# Supplementary material for: Comparative De Novo Transcriptome Analysis of Fertilized Ovules in Xanthoceras sorbifolium Uncovered a Pool of Genes Expressed Specifically or Preferentially in the Selfed Ovule That Are Potentially Involved in Late-Acting Self-Incompatibility
Source: PLoS One. 2015 Oct 20;10(10):e0140507. doi: 10.1371/journal.pone.0140507 (PMC4616620; doi:10.1371/journal.pone.0140507)
Supplement: S1 Table — (XLSX) [file pone.0140507.s001.xlsx]

## Sheet: up
S1 Table. The unigenes expressed specifically or preferentially in the selfed ovules of Xanthoceras sorbifolium
#Gene	Length (bp)	Function	read_Selfed	RPKM_Selfed	read_Crossed	RPKM_Crossed	log2(Fold_change) normalized	q-value(Benjamini et al. 1995)	p-value
comp5780_c0_seq1	2377	PREDICTED: uncharacterized protein LOC100264112	119	1.56077	31	0.605767	1.36543	1.82848e-06	1.38399e-07
comp5793_c0_seq1	1911	(3S)-linalool/(E)-nerolidol synthase	193	3.14861	58	1.40974	1.15928	5.74165e-08	3.58122e-09
comp5846_c0_seq1	1379	conserved hypothetical protein	165	3.73029	47	1.58309	1.23654	1.41433e-07	9.2564e-09
comp5903_c0_seq1	1590	NAC domain protein NAC5	128	2.50978	31	0.905603	1.47061	1.16954e-07	7.58328e-09
comp5928_c0_seq1	2143	predicted protein	190	2.7641	60	1.30048	1.08777	3.83112e-07	2.64161e-08
comp6052_c0_seq1	497	no hit	53	3.32462	6	0.560748	2.56776	1.08545e-06	7.9908e-08
comp6110_c0_seq2	1738	mutt domain protein, putative	119	2.13462	33	0.881937	1.27523	7.04163e-06	5.82585e-07
comp6374_c0_seq1	2523	predicted protein	157	1.94001	42	0.773224	1.32711	5.20443e-08	3.22753e-09
comp6715_c0_seq1	1693	iaa-amino acid hydrolase 9	130	2.39392	25	0.685893	1.80332	3.32524e-10	1.58719e-11
comp6773_c0_seq1	316	catalytic, putative	122	12.0364	20	2.93979	2.03361	3.4555e-11	1.49678e-12
comp6803_c0_seq1	1705	conserved hypothetical protein	563	10.2945	186	5.06713	1.02264	3.46531e-18	8.54899e-20
comp6837_c0_seq1	1020	no hit	235	7.18274	70	3.18765	1.17204	1.00821e-09	5.02321e-11
comp6943_c0_seq1	1550	metal tolerance protein	322	6.47659	101	3.02665	1.09751	7.26834e-12	2.97682e-13
comp6957_c0_seq1	736	unknown	178	7.53988	58	3.66036	1.04256	2.55993e-06	1.97287e-07
comp6983_c0_seq1	889	no hit	176	6.17211	54	2.8214	1.12935	4.85146e-07	3.39892e-08
comp7107_c0_seq1	1361	no hit	594	13.6066	198	6.75741	1.00977	8.90018e-19	2.11773e-20
comp7182_c0_seq1	654	no hit	378	18.0192	124	8.80678	1.03285	1.40877e-12	5.37186e-14
comp7253_c0_seq1	1050	PSI reaction center subunit II	1436	42.6371	392	17.3408	1.29794	5.93445e-67	2.54616e-69
comp7338_c0_seq1	465	unnamed protein product	541	36.2716	172	17.181	1.07803	4.98147e-19	1.16482e-20
comp7393_c0_seq2	763	no hit	3229	131.937	1062	64.6507	1.02911	7.54015e-104	1.61754e-106
comp7397_c0_seq1	772	ERD protein	880	35.5376	214	12.8757	1.4647	2.25444e-49	1.53955e-51
comp7406_c0_seq1	398	no hit	559	43.7876	185	21.5905	1.02013	5.44429e-18	1.36258e-19
comp7409_c0_seq1	948	predicted protein	710	23.3492	204	9.99528	1.22406	2.34049e-30	3.07111e-32
comp7440_c0_seq1	2434	ankyrin repeat-containing protein, putative	808	10.3494	258	4.92348	1.07179	5.89384e-28	8.68197e-30
comp7496_c0_seq1	1658	predicted protein	753	14.159	241	6.75158	1.06842	5.92443e-26	9.71201e-28
comp7577_c0_seq1	333	no hit	314	29.3973	102	14.2275	1.047	9.13144e-11	4.11697e-12
comp7608_c0_seq1	910	60S ribosomal protein L29	692	23.7076	188	9.59599	1.30485	1.17595e-32	1.36856e-34
comp7631_c0_seq1	1691	predicted protein	4052	74.7048	1156	31.7532	1.2343	1.31298e-174	1.0093e-177
comp7698_c0_seq1	745	conserved hypothetical protein	345	14.4373	74	4.61369	1.6458	3.84925e-23	7.21845e-25
comp7702_c0_seq1	381	no hit	245	20.0477	57	6.94901	1.52855	6.24356e-15	1.95104e-16
comp7866_c0_seq1	445	no hit	1009	70.6893	331	34.5495	1.03283	8.82452e-33	1.02225e-34
comp7882_c0_seq1	1242	PREDICTED: chlorophyll a-b binding protein 3, chloroplastic-like isoform 1	788	19.78	259	9.68615	1.03005	1.37752e-25	2.29513e-27
comp7915_c0_seq1	1898	4-coumarate-coa ligase	196	3.21945	62	1.51729	1.08532	2.5226e-07	1.69563e-08
comp7945_c0_seq2	851	PREDICTED: uncharacterized protein LOC100798145	90	3.29712	20	1.09163	1.59473	3.46065e-06	2.72334e-07
comp7985_c0_seq1	1056	conserved hypothetical protein	117	3.45418	32	1.40754	1.29517	6.4695e-06	5.3074e-07
comp7986_c0_seq2	1314	predicted protein	175	4.15207	52	1.83815	1.17558	1.98435e-07	1.32034e-08
comp8062_c0_seq1	1599	glycerate dehydrogenase, putative	219	4.2699	67	1.94625	1.1335	1.15554e-08	6.60832e-10
comp8160_c0_seq1	1873	outward rectifying potassium channel	259	4.31106	83	2.05832	1.06657	3.08646e-09	1.62991e-10
comp8200_c0_seq1	1003	predicted protein	420	13.0548	133	6.15919	1.08377	5.21839e-15	1.62043e-16
comp8203_c0_seq1	1040	conserved hypothetical protein	230	6.89473	72	3.21568	1.10037	1.13213e-08	6.4603e-10
comp8205_c0_seq1	1113	Peroxiredoxin Q, chloroplastic;	214	5.99434	71	2.96303	1.01653	3.38443e-07	2.31788e-08
comp8243_c0_seq1	1365	predicted protein	256	5.84696	78	2.65421	1.1394	4.20421e-10	2.02251e-11
comp8280_c0_seq1	940	ATP synthase F0 subunit 6	110	3.64827	0.5	0.0247067	7.20617	1.23609e-20	2.63181e-22
comp8350_c0_seq1	873	PREDICTED: EID1-like F-box protein 3-like	206	7.35657	68	3.61799	1.02384	5.01146e-07	3.51818e-08
comp8351_c0_seq1	1891	PREDICTED: beta-glucosidase 12-like isoform 1	254	4.18759	46	1.1299	1.88993	1.09922e-20	2.33255e-22
comp9794_c0_seq2	1083	putative chloroplast chlorophyll a/b-binding protein	491	14.1343	127	5.44689	1.3757	3.11401e-25	5.27185e-27
comp10091_c0_seq2	1238	Homeodomain-leucine zipper protein	546	13.7497	149	5.59035	1.29839	1.14602e-25	1.90327e-27
comp10446_c0_seq2	1673	unnamed protein product	855	15.9328	240	6.66329	1.2577	4.77124e-38	4.50358e-40
comp10460_c0_seq2	988	predicted protein	514	16.2192	166	7.80413	1.05539	1.68038e-17	4.31675e-19
comp10572_c0_seq1	859	hypothetical protein VITISV_016717	113	4.10117	21	1.13553	1.85267	2.93715e-09	1.54791e-10
comp10582_c0_seq1	1182	unnamed protein product	259	6.83132	82	3.22233	1.08406	1.82169e-09	9.30419e-11
comp10672_c0_seq1	703	no hit	68	3.01562	0.5	0.033036	6.51227	1.99734e-13	7.03059e-15
comp11093_c0_seq1	488	no hit	861	55.0055	259	24.6521	1.15787	1.18496e-33	1.31761e-35
comp11269_c0_seq1	1172	unnamed protein product	188	5.00095	63	2.49681	1.00211	2.93802e-06	2.28211e-07
comp11333_c0_seq2	756	no hit	106	4.37126	25	1.536	1.50887	1.13524e-06	8.38167e-08
comp11446_c0_seq1	1272	chlorophyll A/B binding protein, putative	1538	37.6957	471	17.1992	1.13206	8.09163e-58	4.48426e-60
comp11498_c0_seq1	605	no hit	632	32.5675	210	16.1227	1.01434	4.28249e-20	9.39365e-22
comp11599_c0_seq1	1718	sarcosine oxidase	461	8.36566	133	3.59585	1.21815	1.05385e-19	2.3493e-21
comp11785_c0_seq1	666	no hit	2431	113.798	780	54.3993	1.06481	1.102e-82	3.44757e-85
comp11889_c0_seq1	879	predicted protein	198	7.02261	62	3.27624	1.09997	1.52048e-07	9.97562e-09
comp11944_c0_seq1	794	predicted protein	181	7.10691	55	3.21748	1.14329	2.35883e-07	1.57837e-08
comp12085_c0_seq1	605	hypothetical protein VITISV_008469	1776	91.5187	586	44.9899	1.02446	9.41634e-57	5.28573e-59
comp12163_c0_seq1	599	Plastocyanin A, chloroplast precursor, putative	199	10.3574	63	4.88525	1.08415	2.03855e-07	1.3586e-08
comp12177_c0_seq1	785	unnamed protein product	147	5.83808	39	2.30764	1.33908	1.23641e-07	8.03895e-09
comp12230_c0_seq1	550	predicted protein	152	8.61595	35	2.95582	1.54345	1.35251e-09	6.80872e-11
comp12271_c0_seq1	882	unknown	3563	125.942	1183	62.3002	1.01545	4.51238e-112	7.98609e-115
comp12404_c0_seq1	780	no hit	3871	154.722	918	54.6665	1.50095	5.54259e-225	2.67528e-228
comp12417_c0_seq1	799	predicted protein	124	4.83835	35	2.03467	1.24972	6.28599e-06	5.14281e-07
comp12493_c0_seq1	801	no hit	148	5.76039	41	2.37752	1.27671	3.54793e-07	2.4381e-08
comp12503_c0_seq1	981	PREDICTED: uncharacterized protein LOC100804686	262	8.32635	86	4.07195	1.03196	7.04159e-09	3.88975e-10
comp12510_c0_seq1	354	no hit	1009	88.8608	334	43.8244	1.01981	4.07416e-32	4.90898e-34
comp12662_c0_seq1	989	conserved hypothetical protein	1480	46.6539	473	22.2146	1.07049	7.63019e-51	5.01969e-53
comp12970_c0_seq1	1668	predicted protein	274	5.12126	88	2.45053	1.06341	1.08294e-09	5.40714e-11
comp13002_c0_seq2	705	PREDICTED: E3 ubiquitin-protein ligase RNF181-like	124	5.48346	35	2.30596	1.24972	6.28599e-06	5.14281e-07
comp13011_c0_seq1	297	cytochrome P450	34	3.56899	2	0.312786	3.51227	7.19434e-06	5.96249e-07
comp13258_c0_seq3	1325	PREDICTED: clp protease-related protein At4g12060, chloroplastic	302	7.10581	87	3.04984	1.22027	4.06582e-13	1.46968e-14
comp13331_c0_seq1	790	PREDICTED: uncharacterized protein LOC100305837	407	16.0616	116	6.82031	1.23571	7.70209e-18	1.94556e-19
comp13492_c0_seq1	371	beta-actin, partial	39	3.27728	0.5	0.0625993	5.71021	4.64329e-08	2.85713e-09
comp13595_c0_seq1	356	no hit	225	19.704	74	9.65506	1.02913	1.11113e-07	7.18269e-09
comp13613_c0_seq1	285	no hit	324	35.4424	107	17.4386	1.02319	1.06206e-10	4.81497e-12
comp13614_c0_seq1	1768	predicted protein	952	16.7872	263	6.9095	1.2807	1.54747e-43	1.20615e-45
comp13615_c0_seq1	1066	expansin 3	146	4.2699	42	1.83006	1.22231	1.16394e-06	8.6019e-08
comp13650_c0_seq1	799	predicted protein	973	37.9654	322	18.719	1.02018	5.30174e-31	6.70086e-33
comp13686_c0_seq1	2163	PREDICTED: uncharacterized protein LOC100268097	181	2.60882	60	1.28845	1.01776	3.44084e-06	2.70651e-07
comp13792_c0_seq2	1475	PREDICTED: putative gamma-glutamylcyclotransferase At3g02910-like	476	10.0609	138	4.34571	1.2111	3.75273e-20	8.20478e-22
comp13815_c0_seq1	2155	unnamed protein product	237	3.42865	79	1.70276	1.00977	7.88592e-08	5.01311e-09
comp13891_c0_seq1	727	no hit	325	13.9371	102	6.51687	1.09668	5.89699e-12	2.39198e-13
comp13995_c0_seq1	702	uncharacterized protein LOC100527691	373	16.5651	100	6.61662	1.32398	3.41416e-18	8.41668e-20
comp14158_c0_seq1	1254	predicted protein	694	17.2538	164	6.07463	1.50605	1.29773e-40	1.12285e-42
comp14294_c0_seq1	1258	conserved hypothetical protein	430	10.6564	141	5.20609	1.03345	3.02411e-14	9.97981e-16
comp14418_c0_seq2	700	Peptide transporter, putative	77	3.42938	16	1.06168	1.69159	8.38881e-06	7.02292e-07
comp14464_c0_seq1	705	no hit	156	6.89855	48	3.16246	1.12525	2.8421e-06	2.2038e-07
comp14660_c0_seq1	3245	predicted protein	157	1.50837	47	0.672754	1.16484	1.22671e-06	9.09432e-08
comp14759_c0_seq1	938	PREDICTED: uncharacterized protein LOC100255664	142	4.71963	41	2.03027	1.217	1.87838e-06	1.42445e-07
comp14842_c0_seq1	671	no hit	145	6.73702	40	2.76892	1.28279	4.32824e-07	3.00295e-08
comp15036_c0_seq1	1206	Carboxy-terminal domain RNA polymerase II polypeptide A small phosphatase, putative	306	7.91037	96	3.69741	1.09723	2.69221e-11	1.15701e-12
comp15538_c1_seq2	698	PREDICTED: small ubiquitin-related modifier 2-like	233	10.4069	66	4.39199	1.2446	1.48958e-10	6.86499e-12
comp15581_c1_seq1	982	Tetrapyrrole-binding protein, chloroplast precursor, putative	184	5.84156	49	2.3177	1.33366	2.4067e-09	1.2533e-10
comp15612_c0_seq1	507	hypothetical protein UTI89_C2916	516	31.7296	2	0.183229	7.43603	4.66111e-94	1.18323e-96
comp15623_c0_seq1	1625	Serine/threonine-protein kinase SAPK10, putative	690	13.2379	230	6.57427	1.00977	9.70051e-22	1.93705e-23
comp15703_c0_seq1	899	PREDICTED: ferredoxin-1, chloroplastic-like	943	32.702	285	14.7251	1.1511	1.73287e-36	1.73169e-38
comp15750_c0_seq1	1380	peroxidase	520	11.7475	152	5.11608	1.19925	1.2146e-21	2.4384e-23
comp15791_c0_seq2	658	Hydrophobic protein OSR8, putative	158	7.48607	50	3.52953	1.08473	5.14001e-06	4.14781e-07
comp15842_c0_seq2	1237	PREDICTED: uncharacterized protein LOC100243041 isoform 1	174	4.38533	55	2.06522	1.08639	1.39974e-06	1.04471e-07
comp15898_c0_seq1	1682	PREDICTED: sigma factor sigB regulation protein rsbQ	262	4.85621	69	1.90544	1.3497	2.63637e-13	9.42133e-15
comp15970_c0_seq1	765	no hit	614	25.0224	186	11.2934	1.14774	8.6084e-24	1.562e-25
comp16052_c0_seq1	1204	no hit	527	13.646	149	5.74821	1.2473	2.61991e-23	4.88499e-25
comp16055_c0_seq1	509	no hit	212	12.985	67	6.11407	1.08664	6.84104e-08	4.30607e-09
comp16122_c0_seq1	864	predicted protein	175	6.31461	58	3.11808	1.01804	5.24553e-06	4.23718e-07
comp16174_c0_seq3	2245	cytochrome P450	522	7.24898	174	3.60003	1.00977	1.4753e-16	4.05892e-18
comp16185_c0_seq1	276	no hit	109	12.3123	29	4.88048	1.33501	8.60976e-06	7.23559e-07
comp16204_c0_seq1	1353	NAC domain protein	376	8.66388	123	4.22261	1.03688	1.36741e-12	5.20681e-14
comp16213_c0_seq1	1209	PREDICTED: uncharacterized protein LOC100251709	386	9.95368	128	4.91764	1.01726	1.5783e-12	6.03804e-14
comp16267_c0_seq2	1344	predicted protein	461	10.6936	150	5.184	1.04461	1.70166e-15	5.07413e-17
comp16650_c0_seq1	1304	beta-1,3-glucanase	287	6.86162	35	1.2467	2.46043	2.85061e-32	3.40414e-34
comp16683_c0_seq1	883	predicted protein	343	12.1103	107	5.62855	1.1054	9.70145e-13	3.63687e-14
comp16820_c0_seq1	1284	PREDICTED: nifU-like protein 3, chloroplastic	102	2.47661	24	0.868199	1.51227	1.84664e-06	1.39906e-07
comp16909_c0_seq1	1161	gibberellin 2-oxidase	65	1.74543	11	0.440082	1.98774	4.52303e-06	3.62162e-07
comp17150_c0_seq1	2257	PREDICTED: subtilisin-like protease	424	5.85675	142	2.92233	1.00298	2.1036e-13	7.4347e-15
comp17167_c0_seq1	1958	predicted protein	236	3.7577	63	1.49452	1.33017	8.69567e-12	3.58006e-13
comp17238_c0_seq1	1321	no hit	123	2.90285	23	0.80872	1.84376	5.78052e-10	2.81493e-11
comp17241_c0_seq1	1597	conserved hypothetical protein	168	3.27964	55	1.59967	1.03576	6.11163e-06	4.99196e-07
comp17371_c0_seq3	1485	hypothetical protein RCOM_1245600	132	2.77121	33	1.03219	1.42481	1.53179e-07	1.00662e-08
comp17403_c0_seq2	1153	PREDICTED: probable protein phosphatase 2C 6	117	3.16358	31	1.24884	1.34097	3.30556e-06	2.58887e-07
comp17418_c0_seq2	1767	Sodium/potassium/calcium exchanger 6 precursor, putative	188	3.31699	62	1.62978	1.0252	1.77951e-06	1.34343e-07
comp17445_c0_seq1	1465	PREDICTED: UDP-glycosyltransferase 91C1-like	141	3.00057	43	1.36334	1.13809	7.97531e-06	6.65963e-07
comp17703_c0_seq2	1305	protein with unknown function	223	5.32742	72	2.56268	1.05578	6.43122e-08	4.03489e-09
comp17727_c0_seq2	962	unknown	151	4.89355	30	1.4485	1.75632	2.30939e-11	9.87533e-13
comp17767_c0_seq2	1052	protein with unknown function	197	5.83812	63	2.78162	1.06958	3.35349e-07	2.29609e-08
comp17814_c0_seq1	1279	purine transporter, putative	172	4.19257	53	1.92477	1.12315	7.71477e-07	5.56217e-08
comp17826_c0_seq1	1218	conserved hypothetical protein	201	5.14483	59	2.24998	1.19321	1.24024e-08	7.11492e-10
comp17938_c0_seq1	1652	predicted protein	358	6.75609	118	3.31776	1.02598	8.07891e-12	3.31891e-13
comp18100_c0_seq2	1482	signal transducer, putative	179	3.76554	56	1.75515	1.10127	6.87184e-07	4.91267e-08
comp18152_c0_seq1	587	predicted protein	742	39.4084	245	19.3866	1.02344	7.26386e-24	1.31024e-25
comp18162_c0_seq2	1270	PREDICTED: uncharacterized protein LOC100252790 isoform 1	373	9.15646	118	4.3157	1.08519	2.04811e-13	7.2276e-15
comp18205_c0_seq1	1315	predicted protein	155	3.67476	49	1.73079	1.08622	6.33234e-06	5.18469e-07
comp18295_c0_seq1	1102	no hit	933	26.3951	249	10.4952	1.33054	2.95101e-45	2.18934e-47
comp18367_c0_seq1	1656	cytochrome P450	172	3.2381	41	1.15	1.49352	2.63261e-10	1.24717e-11
comp18509_c0_seq1	687	predicted protein	416	18.8781	107	7.23436	1.38378	1.26289e-21	2.54438e-23
comp18656_c0_seq1	2690	Beta-amyrin synthase dbj|BAB83088.1| beta-amyrin synthase	2138	24.7787	593	10.2394	1.27496	6.51155e-97	1.54821e-99
comp18792_c0_seq1	916	predicted protein	121	4.11825	33	1.67337	1.29927	4.00522e-06	3.18124e-07
comp18849_c0_seq4	1820	PREDICTED: LOW QUALITY PROTEIN: fatty acyl-CoA reductase 2-like	100	1.71298	24	0.61251	1.4837	3.48242e-06	2.74171e-07
comp18890_c0_seq1	1289	predicted protein	174	4.20842	48	1.72966	1.28279	2.16351e-08	1.27788e-09
comp19056_c1_seq2	637	no hit	786	38.4685	220	16.0419	1.26183	3.51514e-35	3.6887e-37
comp19232_c0_seq1	1853	PREDICTED: uncharacterized protein LOC100251040 isoform 1	512	8.61424	168	4.21121	1.03249	7.75505e-17	2.08787e-18
comp19347_c0_seq1	1377	unknown	178	4.03003	54	1.82152	1.14565	2.90297e-07	1.96505e-08
comp19364_c0_seq1	1027	unnamed protein product	258	7.83198	82	3.70866	1.07848	2.32699e-09	1.20846e-10
comp19382_c0_seq1	1292	PREDICTED: putative peroxisomal-coenzyme A synthetase-like	275	6.63579	85	3.05583	1.1187	1.6281e-10	7.54122e-12
comp19480_c0_seq1	416	PREDICTED: elongation factor 1-gamma-like	132	9.89243	39	4.35456	1.1838	8.27342e-06	6.92484e-07
comp19615_c0_seq1	1636	PREDICTED: UDP-glycosyltransferase 73C2	118	2.24865	31	0.88014	1.35325	2.46466e-06	1.8946e-07
comp19670_c0_seq1	1434	F-box and wd40 domain protein, putative	205	4.45684	60	1.94346	1.1974	7.76661e-09	4.32497e-10
comp19755_c0_seq1	1154	conserved hypothetical protein	219	5.91644	65	2.61626	1.17722	3.67136e-09	1.95323e-10
comp19771_c0_seq1	591	vacuolar ATP synthase subunit G1	147	7.75447	44	3.45811	1.16505	2.98373e-06	2.31975e-07
comp20097_c0_seq1	861	3-hexulose-6-phosphate isomerase, putative	224	8.11087	53	2.85921	1.50424	2.18078e-13	7.71137e-15
comp20487_c0_seq5	629	predicted protein	174	8.62424	58	4.28302	1.00977	6.62704e-06	5.45086e-07
comp20537_c0_seq1	910	PREDICTED: uncharacterized protein LOC100266427	170	5.82412	45	2.29691	1.34234	9.18554e-09	5.16274e-10
comp20577_c0_seq1	2090	Fe(III)-chelate reductase	143	2.1331	44	0.977867	1.12525	8.38878e-06	7.02439e-07
comp20708_c1_seq5	2788	Anthranilate N-methyltransferase;	501	5.60231	153	2.54901	1.13608	3.52859e-19	8.19414e-21
comp20728_c0_seq2	1414	predicted protein	223	4.91675	72	2.36514	1.05578	6.43122e-08	4.03489e-09
comp21042_c0_seq1	319	no hit	91	8.89351	11	1.60168	2.47317	1.25395e-10	5.7432e-12
comp21042_c1_seq1	1083	predicted protein	1759	50.6361	401	17.1984	1.55789	6.39466e-108	1.25749e-110
comp21259_c0_seq2	298	conserved hypothetical protein	137	14.3327	22	3.4291	2.06341	1.01139e-12	3.79691e-14
comp21382_c0_seq2	2517	PREDICTED: protein TIFY 6B isoform 1	3581	44.3551	1145	21.1298	1.06982	1.08305e-122	1.62637e-125
comp21386_c1_seq1	576	no hit	200	10.8251	58	4.67712	1.21068	8.90159e-09	4.9936e-10
comp21396_c1_seq1	1417	unknown	1270	27.9419	417	13.6691	1.03151	4.26124e-41	3.64892e-43
comp21402_c0_seq1	1413	unknown	1902	41.9653	590	19.3947	1.11354	1.47092e-69	5.73242e-72
comp21456_c1_seq1	962	no hit	332	10.7593	106	5.11804	1.07192	8.89958e-12	3.66719e-13
comp21526_c0_seq2	1163	hypothetical protein VITISV_011421	104	2.78789	26	1.03841	1.42481	4.57022e-06	3.66186e-07
comp21711_c0_seq1	1414	predicted protein	163	3.59386	53	1.741	1.04561	7.2805e-06	6.04366e-07
comp21714_c0_seq1	304	no hit	175	17.9468	58	8.86192	1.01804	5.24553e-06	4.23718e-07
comp21740_c0_seq1	2744	white-brown-complex ABC transporter family	228	2.59044	65	1.10028	1.23533	3.1708e-10	1.51234e-11
comp21773_c0_seq1	1231	conserved hypothetical protein	253	6.40745	73	2.75447	1.21797	4.77707e-11	2.09143e-12
comp21821_c0_seq2	914	annexin, putative	126	4.29781	36	1.82949	1.23216	6.76516e-06	5.57656e-07
comp21911_c0_seq1	1574	unnamed protein product	173	3.4266	54	1.59354	1.10455	1.04238e-06	7.65138e-08
comp21946_c0_seq1	1669	predicted protein	115	2.14815	27	0.751416	1.51541	3.15615e-07	2.15081e-08
comp22080_c0_seq1	1270	ubiquitin-protein ligase, putative	143	3.51039	37	1.35323	1.37522	9.96475e-08	6.40945e-09
comp22084_c0_seq1	1450	uncharacterized protein LOC100812463	1207	25.9515	320	10.2507	1.34009	3.67256e-59	1.99589e-61
comp22296_c0_seq5	1407	PREDICTED: probable peptidyl-tRNA hydrolase 2-like	156	3.45663	48	1.5846	1.12525	2.8421e-06	2.2038e-07
comp22433_c0_seq1	1064	Major latex protein, putative	1883	55.1736	540	23.5736	1.22681	2.23383e-80	7.34788e-83
comp22480_c0_seq1	1625	predicted protein	302	5.79397	98	2.80121	1.0485	2.12074e-10	9.94442e-12
comp22594_c0_seq1	1532	predicted protein	134	2.7269	36	1.09148	1.32097	7.05692e-07	5.05634e-08
comp22680_c0_seq1	1239	conserved hypothetical protein	147	3.69887	42	1.57453	1.23216	8.83683e-07	6.43118e-08
comp22719_c0_seq1	1079	predicted protein	223	6.44326	46	1.9802	1.70214	7.78973e-16	2.2657e-17
comp22915_c0_seq1	519	no hit	498	29.9147	139	12.44	1.26587	1.50108e-22	2.88205e-24
comp22954_c0_seq1	1195	Gip1-like protein	3920	102.268	1259	48.9363	1.06338	5.54611e-133	6.94032e-136
comp23106_c0_seq1	972	PREDICTED: auxin-repressed 12.5 kDa protein isoform 1	3598	115.403	1140	54.4768	1.08297	9.51732e-126	1.36112e-128
comp23106_c1_seq1	227	no hit	44	6.04295	2	0.409239	3.88424	6.21017e-08	3.89121e-09
comp23147_c0_seq1	1413	carotenoid beta-ring hydroxylase	423	9.33299	132	4.33915	1.10493	1.41548e-15	4.19295e-17
comp23167_c0_seq2	1004	talisin	1327	41.2059	341	15.7759	1.38513	2.37895e-68	9.61141e-71
comp23180_c0_seq1	342	no hit	185	16.8643	60	8.14889	1.0493	1.31147e-06	9.75546e-08
comp23211_c0_seq1	1645	PREDICTED: 5'-adenylylsulfate reductase 3, chloroplastic-like isoform 1	955	18.0992	267	7.53908	1.26347	9.11732e-43	7.30194e-45
comp23246_c0_seq2	298	no hit	181	18.9358	50	7.7934	1.2808	1.10182e-08	6.26666e-10
comp23254_c0_seq1	1562	predicted protein	2286	45.6266	732	21.7672	1.06772	4.18335e-78	1.43588e-80
comp23298_c0_seq1	1379	predicted protein	352	7.95794	85	2.86304	1.47485	3.61538e-20	7.8851e-22
comp23344_c0_seq1	1347	PREDICTED: serine/threonine-protein kinase SAPK2-like	176	4.0735	57	1.96553	1.05135	2.47947e-06	1.90643e-07
comp23387_c1_seq1	917	DUF26 domain-containing protein 1 precursor, putative	202	6.86759	62	3.14048	1.12882	5.46375e-08	3.40105e-09
comp23419_c0_seq1	821	putative miraculin-like protein 2	459	17.4298	140	7.9206	1.13787	1.18506e-17	3.0295e-19
comp23586_c0_seq1	1514	PREDICTED: uncharacterized protein LOC100257521	140	2.88287	31	0.951062	1.59989	2.4814e-09	1.29486e-10
comp23598_c0_seq11	1218	predicted protein	163	4.17218	46	1.75422	1.24997	1.30937e-07	8.53674e-09
comp23705_c0_seq1	1627	serine carboxypeptidase, putative	310	5.94014	96	2.74067	1.11597	9.68494e-12	4.00639e-13
comp23862_c0_seq2	620	no hit	163	8.19631	53	3.97061	1.04561	7.2805e-06	6.04366e-07
comp24050_c0_seq1	2863	lipoxygenase, putative	482	5.24866	148	2.40112	1.12824	2.86899e-18	7.04195e-20
comp24115_c0_seq1	1997	cytochrome P450	2377	37.1085	733	17.049	1.12206	5.22661e-88	1.48563e-90
comp24151_c0_seq3	850	PREDICTED: uncharacterized protein LOC100854101	192	7.04214	58	3.16944	1.15179	7.46129e-08	4.72183e-09
comp24157_c0_seq2	1646	predicted protein	187	3.54188	51	1.43917	1.29927	3.89508e-09	2.07713e-10
comp24235_c0_seq4	1767	predicted protein	231	4.07566	76	1.99779	1.02863	7.29633e-08	4.60439e-09
comp24393_c0_seq9	1917	unnamed protein product	190	3.08997	63	1.52648	1.01738	1.82746e-06	1.38289e-07
comp24541_c0_seq7	2034	PREDICTED: receptor-like protein 12-like	150	2.29913	43	0.981953	1.22736	7.23732e-07	5.19465e-08
comp24691_c0_seq1	1483	predicted protein	318	6.68511	91	2.85019	1.22989	5.98236e-14	2.01808e-15
comp24773_c1_seq2	1090	hypothetical protein VITISV_029434	178	5.09115	54	2.30113	1.14565	2.90297e-07	1.96505e-08
comp24825_c0_seq1	650	unknown	566	27.1472	172	12.291	1.1432	8.00249e-22	1.59369e-23
comp24912_c0_seq3	1422	o-methyltransferase, putative	808	17.7147	259	8.46006	1.06621	1.0006e-27	1.50256e-29
comp25083_c0_seq1	1375	unknown	200	4.53471	64	2.16197	1.06866	2.72389e-07	1.83872e-08
comp25118_c0_seq1	580	no hit	256	13.7605	84	6.72705	1.03249	1.0688e-08	6.05881e-10
comp25189_c0_seq1	1264	geranylgeranyl pyrophosphate synthase 1	316	7.79404	106	3.89522	1.00067	4.30306e-10	2.07083e-11
comp25421_c1_seq1	845	putative miraculin-like protein 2	478	17.6357	113	6.21148	1.50549	4.47188e-28	6.56337e-30
comp25645_c0_seq1	2678	predicted protein	1056	12.2935	338	5.86245	1.06832	3.19275e-36	3.23053e-38
comp25659_c1_seq3	1087	structural molecule, putative	326	9.34998	108	4.61495	1.01865	1.0919e-10	4.95415e-12
comp25766_c0_seq5	1718	no hit	263	4.7726	85	2.2981	1.05433	3.30932e-09	1.75411e-10
comp25899_c0_seq3	1085	predicted protein	175	5.02841	46	1.96925	1.35245	4.2575e-09	2.28028e-10
comp25928_c0_seq2	1435	PREDICTED: 11S globulin seed storage protein 2	339	7.36496	106	3.43105	1.10203	1.54149e-12	5.89171e-14
comp25982_c0_seq1	1417	PREDICTED: UPF0481 protein At3g47200	362	7.96455	119	3.90077	1.02983	5.1353e-12	2.07384e-13
comp26579_c0_seq1	379	no hit	3290	270.632	1007	123.414	1.13283	1.17734e-123	1.72587e-126
comp26604_c0_seq1	917	60S ribosomal protein L27a, putative	5132	174.478	1616	81.855	1.0919	7.57783e-182	5.55421e-185
comp26611_c0_seq1	745	no hit	3625	151.696	1166	72.6968	1.06122	1.40265e-122	2.13138e-125
comp26697_c0_seq1	514	no hit	2570	155.881	762	68.8597	1.17871	5.93644e-103	1.29473e-105
comp26789_c0_seq1	352	no hit	2148	190.245	709	93.5571	1.02394	1.60154e-68	6.41325e-71
comp27155_c0_seq1	270	no hit	650	75.0537	151	25.9768	1.5307	5.70662e-39	5.21306e-41
comp27677_c0_seq1	272	no hit	400	45.8473	116	19.809	1.21068	5.35992e-17	1.42483e-18
comp28944_c0_seq1	1288	conserved hypothetical protein	1583	38.3166	499	17.9952	1.09036	5.18916e-56	2.9778e-58
comp29027_c0_seq1	351	no hit	85	7.54978	19	2.51431	1.58627	7.72909e-06	6.43883e-07
comp29121_c1_seq1	370	no hit	181	15.251	50	6.27685	1.2808	1.10182e-08	6.26666e-10
comp29311_c0_seq1	692	conserved hypothetical protein	599	26.9863	197	13.2231	1.02917	1.62298e-19	3.66157e-21
comp29864_c0_seq1	238	no hit	186	24.3646	61	11.9049	1.03323	1.72842e-06	1.303e-07
comp30668_c0_seq1	738	uncharacterized protein LOC100305709	356	15.0389	112	7.04912	1.09318	5.64937e-13	2.06633e-14
comp30856_c0_seq1	511	predicted protein	267	16.2897	88	7.99899	1.02607	5.88992e-09	3.21251e-10
comp31037_c0_seq1	288	no hit	222	24.0316	62	9.99936	1.26503	2.49974e-10	1.18199e-11
comp31612_c0_seq1	1518	predicted protein	1092	22.4271	365	11.1685	1.00581	5.98047e-34	6.6072e-36
comp31965_c0_seq1	467	conserved hypothetical protein	293	19.5602	80	7.95694	1.29763	5.64582e-14	1.90051e-15
comp32073_c0_seq1	530	no hit	332	19.5292	104	9.11445	1.09941	3.01847e-12	1.18714e-13
comp32081_c0_seq1	418	no hit	218	16.2593	73	8.11185	1.00317	3.55614e-07	2.44438e-08
comp32171_c0_seq1	595	PREDICTED: calvin cycle protein CP12-like	335	17.553	97	7.5723	1.21291	2.31967e-14	7.5763e-16
comp32213_c0_seq1	309	no hit	246	24.8198	81	12.1759	1.02747	2.53941e-08	1.51671e-09
comp32523_c0_seq1	1125	Caffeoyl-CoA O-methyltransferase;	622	17.2369	208	8.58784	1.00514	1.71239e-19	3.87246e-21
comp32593_c0_seq1	669	predicted protein	270	12.5823	73	5.06839	1.3118	3.95583e-13	1.42921e-14
comp32688_c0_seq1	1497	5-methyltetrahydrofolate:homocysteine methyltransferase, putative	460	9.57985	142	4.40595	1.12055	2.85962e-17	7.49437e-19
comp32768_c0_seq1	2159	AMP dependent ligase, putative	795	11.4799	263	5.65817	1.0207	1.9684e-25	3.30072e-27
comp33345_c0_seq1	1675	PREDICTED: peroxidase 9	644	11.9865	182	5.04696	1.24793	2.06871e-28	2.97706e-30
comp33702_c0_seq1	446	no hit	197	13.7706	57	5.93626	1.21397	1.08849e-08	6.18209e-10
comp34425_c0_seq1	405	no hit	160	12.3165	43	4.93159	1.32047	4.29574e-08	2.63559e-09
comp35195_c0_seq1	482	no hit	167	10.8017	33	3.1801	1.76412	1.3976e-12	5.32426e-14
comp36419_c0_seq1	1787	no hit	325	5.66998	87	2.26135	1.32616	5.91251e-16	1.70596e-17
comp37668_c0_seq1	248	no hit	87	10.9368	20	3.74586	1.54582	9.17468e-06	7.7366e-07
comp38722_c0_seq1	326	no hit	134	12.8147	37	5.27178	1.28144	1.37297e-06	1.02301e-07
comp39207_c0_seq1	220	no hit	77	10.9117	12	2.53356	2.10663	1.372e-07	8.96957e-09
comp40431_c0_seq1	821	predicted protein	140	5.31627	35	1.98015	1.42481	5.79894e-08	3.62006e-09
comp40972_c0_seq1	587	PREDICTED: uncharacterized protein LOC100259559	150	7.96665	37	2.92777	1.44417	1.19182e-08	6.82645e-10
comp42166_c0_seq1	423	no hit	109	8.03357	0.5	0.0549039	7.19299	1.81147e-20	3.88927e-22
comp43895_c0_seq1	856	predicted protein	148	5.39027	34	1.84492	1.5468	2.18422e-09	1.12885e-10
comp44301_c0_seq1	1253	PREDICTED: RING-H2 finger protein ATL5	179	4.45374	46	1.70522	1.38506	1.30152e-09	6.54039e-11
comp45157_c0_seq1	758	PREDICTED: uncharacterized protein LOC100243168	136	5.59361	33	2.02217	1.46787	4.44809e-08	2.73066e-09
comp45507_c0_seq1	654	conserved hypothetical protein	81	3.86127	13	0.923291	2.06422	9.1734e-08	5.86764e-09
comp46802_c0_seq1	1125	Nitrogen fixation protein nifU, putative	148	4.1014	46	1.89923	1.1107	7.14238e-06	5.91432e-07
comp48912_c0_seq1	2371	PREDICTED: uncharacterized protein LOC100267728	251	3.30039	60	1.17542	1.48946	9.93798e-15	3.1517e-16
comp49604_c0_seq1	684	cytochrome P450, putative	73	3.32728	7	0.475352	2.80728	7.95101e-10	3.92874e-11
comp50074_c0_seq1	662	predicted protein	55	2.59016	7	0.491149	2.39881	1.90173e-06	1.44318e-07
comp54876_c0_seq1	1308	kinase, putative	137	3.26539	5	0.177556	4.20091	1.14053e-24	1.98182e-26
comp56021_c0_seq1	2913	xenotropic and polytropic murine leukemia virus receptor pho1, putative	198	2.11908	66	1.05239	1.00977	1.22622e-06	9.08849e-08
comp57667_c0_seq1	863	unknown protein	57	2.05914	0.5	0.0269112	6.2577	1.94419e-11	8.25459e-13
comp61874_c0_seq1	1576	no hit	96	1.89905	0.5	0.0147363	7.00977	2.71981e-18	6.66607e-20
comp64661_c0_seq1	763	hypothetical protein	43	1.75698	0.5	0.0304382	5.85107	8.01682e-09	4.47433e-10
comp70739_c0_seq1	726	hypothetical protein	35	1.50298	0.5	0.0319894	5.55409	2.77845e-07	1.87654e-08
comp73021_c0_seq1	506	cytochrome P450	40	2.46452	2	0.183592	3.74673	4.20511e-07	2.91376e-08
comp99708_c0_seq1	1725	no hit	55	0.994022	0.5	0.0134634	6.20617	4.56261e-11	1.99509e-12
