# Supplementary material for: Comparative De Novo Transcriptome Analysis of Fertilized Ovules in Xanthoceras sorbifolium Uncovered a Pool of Genes Expressed Specifically or Preferentially in the Selfed Ovule That Are Potentially Involved in Late-Acting Self-Incompatibility
Source: PLoS One. 2015 Oct 20;10(10):e0140507. doi: 10.1371/journal.pone.0140507 (PMC4616620; doi:10.1371/journal.pone.0140507)
Supplement: S5 Table — (XLSX) [file pone.0140507.s005.xlsx]

## Sheet: Sheet1
S5 Table. The unigenes assigned with KO number and EC number.
Gene_ID	KO_ID	Annotaion
comp18302_c0_seq1	K00128	E1.2.1.3; aldehyde dehydrogenase (NAD+) [EC:1.2.1.3]
comp9466_c0_seq1	K01810	GPI, pgi; glucose-6-phosphate isomerase [EC:5.3.1.9]
comp22134_c0_seq1	K03841	FBP, fbp; fructose-1,6-bisphosphatase I [EC:3.1.3.11]
comp8379_c0_seq1	K00850	pfkA, PFK; 6-phosphofructokinase 1 [EC:2.7.1.11]
comp16013_c0_seq1	K00121	frmA, ADH5, adhC; S-(hydroxymethyl)glutathione dehydrogenase / alcohol dehydrogenase [EC:1.1.1.284 1.1.1.1]
comp25512_c1_seq9	K14085	ALDH7A1; aldehyde dehydrogenase family 7 member A1 [EC:1.2.1.31 1.2.1.8 1.2.1.3]
comp24148_c0_seq3	K00873	PK, pyk; pyruvate kinase [EC:2.7.1.40]
comp23740_c0_seq1	K01623	ALDO; fructose-bisphosphate aldolase, class I [EC:4.1.2.13]
comp13307_c0_seq1	K01895	ACSS, acs; acetyl-CoA synthetase [EC:6.2.1.1]
comp16078_c0_seq1	K01803	TPI, tpiA; triosephosphate isomerase (TIM) [EC:5.3.1.1]
comp233726_c0_seq1	K03841	FBP, fbp; fructose-1,6-bisphosphatase I [EC:3.1.3.11]
comp15788_c0_seq1	K00134	GAPDH, gapA; glyceraldehyde 3-phosphate dehydrogenase [EC:1.2.1.12]
comp12822_c0_seq1	K15634	gpmB; probable phosphoglycerate mutase [EC:5.4.2.12]
comp18960_c0_seq4	K00850	pfkA, PFK; 6-phosphofructokinase 1 [EC:2.7.1.11]
comp24526_c0_seq3	K00873	PK, pyk; pyruvate kinase [EC:2.7.1.40]
comp22127_c0_seq3	K01610	E4.1.1.49, pckA; phosphoenolpyruvate carboxykinase (ATP) [EC:4.1.1.49]
comp24849_c0_seq1	K00162	PDHB, pdhB; pyruvate dehydrogenase E1 component subunit beta [EC:1.2.4.1]
comp15830_c0_seq1	K00161	PDHA, pdhA; pyruvate dehydrogenase E1 component subunit alpha [EC:1.2.4.1]
comp6806_c0_seq1	K01834	PGAM, gpmA; 2,3-bisphosphoglycerate-dependent phosphoglycerate mutase [EC:5.4.2.11]
comp7335_c0_seq2	K00016	LDH, ldh; L-lactate dehydrogenase [EC:1.1.1.27]
comp19154_c0_seq6	K00850	pfkA, PFK; 6-phosphofructokinase 1 [EC:2.7.1.11]
comp27099_c0_seq1	K00128	E1.2.1.3; aldehyde dehydrogenase (NAD+) [EC:1.2.1.3]
comp20225_c0_seq3	K00873	PK, pyk; pyruvate kinase [EC:2.7.1.40]
comp14571_c0_seq1	K01689	ENO, eno; enolase [EC:4.2.1.11]
comp6786_c0_seq2	K00873	PK, pyk; pyruvate kinase [EC:2.7.1.40]
comp11770_c1_seq1	K01835	pgm; phosphoglucomutase [EC:5.4.2.2]
comp25892_c1_seq1	K00850	pfkA, PFK; 6-phosphofructokinase 1 [EC:2.7.1.11]
comp24165_c1_seq1	K00844	HK; hexokinase [EC:2.7.1.1]
comp18178_c0_seq1	K00873	PK, pyk; pyruvate kinase [EC:2.7.1.40]
comp11450_c0_seq1	K00001	E1.1.1.1, adh; alcohol dehydrogenase [EC:1.1.1.1]
comp25103_c1_seq10	K00627	DLAT, aceF, pdhC; pyruvate dehydrogenase E2 component (dihydrolipoamide acetyltransferase) [EC:2.3.1.12]
comp25336_c0_seq1	K01568	E4.1.1.1, pdc; pyruvate decarboxylase [EC:4.1.1.1]
comp23289_c0_seq1	K00927	PGK, pgk; phosphoglycerate kinase [EC:2.7.2.3]
comp23096_c1_seq1	K00161	PDHA, pdhA; pyruvate dehydrogenase E1 component subunit alpha [EC:1.2.4.1]
comp20593_c0_seq1	K01568	E4.1.1.1, pdc; pyruvate decarboxylase [EC:4.1.1.1]
comp21241_c0_seq1	K01689	ENO, eno; enolase [EC:4.2.1.11]
comp16301_c0_seq2	K15634	gpmB; probable phosphoglycerate mutase [EC:5.4.2.12]
comp30299_c0_seq1	K01792	E5.1.3.15; glucose-6-phosphate 1-epimerase [EC:5.1.3.15]
comp13007_c0_seq1	K00873	PK, pyk; pyruvate kinase [EC:2.7.1.40]
comp22056_c0_seq1	K00850	pfkA, PFK; 6-phosphofructokinase 1 [EC:2.7.1.11]
comp26535_c0_seq1	K01689	ENO, eno; enolase [EC:4.2.1.11]
comp16901_c0_seq1	K00128	E1.2.1.3; aldehyde dehydrogenase (NAD+) [EC:1.2.1.3]
comp24292_c0_seq1	K15633	gpmI; 2,3-bisphosphoglycerate-independent phosphoglycerate mutase [EC:5.4.2.12]
comp29752_c0_seq1	K00627	DLAT, aceF, pdhC; pyruvate dehydrogenase E2 component (dihydrolipoamide acetyltransferase) [EC:2.3.1.12]
comp25350_c0_seq1	K03841	FBP, fbp; fructose-1,6-bisphosphatase I [EC:3.1.3.11]
comp21460_c0_seq6	K15634	gpmB; probable phosphoglycerate mutase [EC:5.4.2.12]
comp27876_c0_seq1	K00121	frmA, ADH5, adhC; S-(hydroxymethyl)glutathione dehydrogenase / alcohol dehydrogenase [EC:1.1.1.284 1.1.1.1]
comp24876_c0_seq1	K01785	E5.1.3.3, galM; aldose 1-epimerase [EC:5.1.3.3]
comp14563_c0_seq2	K15634	gpmB; probable phosphoglycerate mutase [EC:5.4.2.12]
comp22253_c0_seq1	K00873	PK, pyk; pyruvate kinase [EC:2.7.1.40]
comp14689_c0_seq1	K00873	PK, pyk; pyruvate kinase [EC:2.7.1.40]
comp27247_c0_seq1	K01803	TPI, tpiA; triosephosphate isomerase (TIM) [EC:5.3.1.1]
comp7557_c0_seq1	K01623	ALDO; fructose-bisphosphate aldolase, class I [EC:4.1.2.13]
comp6848_c0_seq1	K00001	E1.1.1.1, adh; alcohol dehydrogenase [EC:1.1.1.1]
comp15960_c0_seq1	K00382	DLD, lpd, pdhD; dihydrolipoamide dehydrogenase [EC:1.8.1.4]
comp25584_c0_seq15	K01835	pgm; phosphoglucomutase [EC:5.4.2.2]
comp15467_c0_seq1	K00844	HK; hexokinase [EC:2.7.1.1]
comp21384_c0_seq1	K00134	GAPDH, gapA; glyceraldehyde 3-phosphate dehydrogenase [EC:1.2.1.12]
comp25418_c0_seq2	K01792	E5.1.3.15; glucose-6-phosphate 1-epimerase [EC:5.1.3.15]
comp25245_c0_seq1	K01689	ENO, eno; enolase [EC:4.2.1.11]
comp17218_c0_seq2	K01785	E5.1.3.3, galM; aldose 1-epimerase [EC:5.1.3.3]
comp573_c0_seq2	K00121	frmA, ADH5, adhC; S-(hydroxymethyl)glutathione dehydrogenase / alcohol dehydrogenase [EC:1.1.1.284 1.1.1.1]
comp20554_c0_seq3	K01792	E5.1.3.15; glucose-6-phosphate 1-epimerase [EC:5.1.3.15]
comp15716_c0_seq1	K00131	E1.2.1.9, gapN; glyceraldehyde-3-phosphate dehydrogenase (NADP) [EC:1.2.1.9]
comp20076_c0_seq1	K01834	PGAM, gpmA; 2,3-bisphosphoglycerate-dependent phosphoglycerate mutase [EC:5.4.2.11]
comp25014_c0_seq1	K00382	DLD, lpd, pdhD; dihydrolipoamide dehydrogenase [EC:1.8.1.4]
comp15735_c0_seq1	K01623	ALDO; fructose-bisphosphate aldolase, class I [EC:4.1.2.13]
comp12011_c0_seq1	K01810	GPI, pgi; glucose-6-phosphate isomerase [EC:5.3.1.9]
comp18552_c0_seq1	K00162	PDHB, pdhB; pyruvate dehydrogenase E1 component subunit beta [EC:1.2.4.1]
comp21298_c0_seq1	K00162	PDHB, pdhB; pyruvate dehydrogenase E1 component subunit beta [EC:1.2.4.1]
comp76210_c0_seq1	K00128	E1.2.1.3; aldehyde dehydrogenase (NAD+) [EC:1.2.1.3]
comp18079_c1_seq1	K00031	IDH1, IDH2, icd; isocitrate dehydrogenase [EC:1.1.1.42]
comp7089_c0_seq1	K00026	MDH2; malate dehydrogenase [EC:1.1.1.37]
comp22703_c0_seq1	K01681	ACO, acnA; aconitate hydratase [EC:4.2.1.3]
comp23258_c0_seq1	K01648	ACLY; ATP citrate (pro-S)-lyase [EC:2.3.3.8]
comp20616_c0_seq1	K00026	MDH2; malate dehydrogenase [EC:1.1.1.37]
comp18113_c0_seq1	K00234	SDHA, SDH1; succinate dehydrogenase (ubiquinone) flavoprotein subunit [EC:1.3.5.1]
comp22127_c0_seq3	K01610	E4.1.1.49, pckA; phosphoenolpyruvate carboxykinase (ATP) [EC:4.1.1.49]
comp24849_c0_seq1	K00162	PDHB, pdhB; pyruvate dehydrogenase E1 component subunit beta [EC:1.2.4.1]
comp15830_c0_seq1	K00161	PDHA, pdhA; pyruvate dehydrogenase E1 component subunit alpha [EC:1.2.4.1]
comp33142_c0_seq1	K01647	CS, gltA; citrate synthase [EC:2.3.3.1]
comp15108_c0_seq1	K00235	SDHB, SDH2; succinate dehydrogenase (ubiquinone) iron-sulfur subunit [EC:1.3.5.1]
comp20682_c0_seq1	K01681	ACO, acnA; aconitate hydratase [EC:4.2.1.3]
comp25103_c1_seq10	K00627	DLAT, aceF, pdhC; pyruvate dehydrogenase E2 component (dihydrolipoamide acetyltransferase) [EC:2.3.1.12]
comp23096_c1_seq1	K00161	PDHA, pdhA; pyruvate dehydrogenase E1 component subunit alpha [EC:1.2.4.1]
comp19849_c0_seq2	K00026	MDH2; malate dehydrogenase [EC:1.1.1.37]
comp16510_c0_seq1	K00030	IDH3; isocitrate dehydrogenase (NAD+) [EC:1.1.1.41]
comp8011_c0_seq1	K01648	ACLY; ATP citrate (pro-S)-lyase [EC:2.3.3.8]
comp29752_c0_seq1	K00627	DLAT, aceF, pdhC; pyruvate dehydrogenase E2 component (dihydrolipoamide acetyltransferase) [EC:2.3.1.12]
comp27324_c0_seq1	K01648	ACLY; ATP citrate (pro-S)-lyase [EC:2.3.3.8]
comp22866_c0_seq1	K00031	IDH1, IDH2, icd; isocitrate dehydrogenase [EC:1.1.1.42]
comp7114_c1_seq1	K01900	LSC2; succinyl-CoA synthetase beta subunit [EC:6.2.1.4 6.2.1.5]
comp16423_c0_seq1	K00030	IDH3; isocitrate dehydrogenase (NAD+) [EC:1.1.1.41]
comp23691_c0_seq1	K01679	E4.2.1.2B, fumC; fumarate hydratase, class II [EC:4.2.1.2]
comp13410_c0_seq1	K00026	MDH2; malate dehydrogenase [EC:1.1.1.37]
comp7244_c0_seq1	K01899	LSC1; succinyl-CoA synthetase alpha subunit [EC:6.2.1.4 6.2.1.5]
comp8311_c0_seq1	K00658	DLST, sucB; 2-oxoglutarate dehydrogenase E2 component (dihydrolipoamide succinyltransferase) [EC:2.3.1.61]
comp15960_c0_seq1	K00382	DLD, lpd, pdhD; dihydrolipoamide dehydrogenase [EC:1.8.1.4]
comp24875_c2_seq1	K00164	OGDH, sucA; 2-oxoglutarate dehydrogenase E1 component [EC:1.2.4.2]
comp22259_c0_seq3	K01647	CS, gltA; citrate synthase [EC:2.3.3.1]
comp19057_c0_seq1	K00030	IDH3; isocitrate dehydrogenase (NAD+) [EC:1.1.1.41]
comp25014_c0_seq1	K00382	DLD, lpd, pdhD; dihydrolipoamide dehydrogenase [EC:1.8.1.4]
comp7365_c0_seq1	K00025	MDH1; malate dehydrogenase [EC:1.1.1.37]
comp18552_c0_seq1	K00162	PDHB, pdhB; pyruvate dehydrogenase E1 component subunit beta [EC:1.2.4.1]
comp21298_c0_seq1	K00162	PDHB, pdhB; pyruvate dehydrogenase E1 component subunit beta [EC:1.2.4.1]
comp21852_c0_seq2	K01783	rpe, RPE; ribulose-phosphate 3-epimerase [EC:5.1.3.1]
comp22497_c0_seq2	K01057	PGLS, pgl, devB; 6-phosphogluconolactonase [EC:3.1.1.31]
comp21513_c0_seq1	K00036	G6PD, zwf; glucose-6-phosphate 1-dehydrogenase [EC:1.1.1.49]
comp18645_c0_seq1	K01807	rpiA; ribose 5-phosphate isomerase A [EC:5.3.1.6]
comp9466_c0_seq1	K01810	GPI, pgi; glucose-6-phosphate isomerase [EC:5.3.1.9]
comp21458_c0_seq2	K00033	PGD, gnd; 6-phosphogluconate dehydrogenase [EC:1.1.1.44]
comp22134_c0_seq1	K03841	FBP, fbp; fructose-1,6-bisphosphatase I [EC:3.1.3.11]
comp8379_c0_seq1	K00850	pfkA, PFK; 6-phosphofructokinase 1 [EC:2.7.1.11]
comp6872_c0_seq1	K00036	G6PD, zwf; glucose-6-phosphate 1-dehydrogenase [EC:1.1.1.49]
comp23740_c0_seq1	K01623	ALDO; fructose-bisphosphate aldolase, class I [EC:4.1.2.13]
comp233726_c0_seq1	K03841	FBP, fbp; fructose-1,6-bisphosphatase I [EC:3.1.3.11]
comp27776_c0_seq1	K00616	E2.2.1.2, talA, talB; transaldolase [EC:2.2.1.2]
comp10663_c0_seq1	K01807	rpiA; ribose 5-phosphate isomerase A [EC:5.3.1.6]
comp18960_c0_seq4	K00850	pfkA, PFK; 6-phosphofructokinase 1 [EC:2.7.1.11]
comp19154_c0_seq6	K00850	pfkA, PFK; 6-phosphofructokinase 1 [EC:2.7.1.11]
comp21351_c0_seq10	K01783	rpe, RPE; ribulose-phosphate 3-epimerase [EC:5.1.3.1]
comp8307_c0_seq1	K00851	E2.7.1.12, gntK, idnK; gluconokinase [EC:2.7.1.12]
comp22427_c0_seq6	K00948	PRPS, prsA; ribose-phosphate pyrophosphokinase [EC:2.7.6.1]
comp11770_c1_seq1	K01835	pgm; phosphoglucomutase [EC:5.4.2.2]
comp25892_c1_seq1	K00850	pfkA, PFK; 6-phosphofructokinase 1 [EC:2.7.1.11]
comp12477_c0_seq1	K00615	E2.2.1.1, tktA, tktB; transketolase [EC:2.2.1.1]
comp22056_c0_seq1	K00850	pfkA, PFK; 6-phosphofructokinase 1 [EC:2.7.1.11]
comp25777_c0_seq1	K00036	G6PD, zwf; glucose-6-phosphate 1-dehydrogenase [EC:1.1.1.49]
comp25350_c0_seq1	K03841	FBP, fbp; fructose-1,6-bisphosphatase I [EC:3.1.3.11]
comp21434_c0_seq1	K01057	PGLS, pgl, devB; 6-phosphogluconolactonase [EC:3.1.1.31]
comp11615_c0_seq1	K00615	E2.2.1.1, tktA, tktB; transketolase [EC:2.2.1.1]
comp7557_c0_seq1	K01623	ALDO; fructose-bisphosphate aldolase, class I [EC:4.1.2.13]
comp25584_c0_seq15	K01835	pgm; phosphoglucomutase [EC:5.4.2.2]
comp31606_c0_seq1	K00033	PGD, gnd; 6-phosphogluconate dehydrogenase [EC:1.1.1.44]
comp20681_c0_seq1	K00616	E2.2.1.2, talA, talB; transaldolase [EC:2.2.1.2]
comp8062_c0_seq1	K00090	E1.1.1.215; gluconate 2-dehydrogenase [EC:1.1.1.215]
comp15735_c0_seq1	K01623	ALDO; fructose-bisphosphate aldolase, class I [EC:4.1.2.13]
comp12011_c0_seq1	K01810	GPI, pgi; glucose-6-phosphate isomerase [EC:5.3.1.9]
comp21852_c0_seq2	K01783	rpe, RPE; ribulose-phosphate 3-epimerase [EC:5.1.3.1]
comp21645_c1_seq2	K00699	UGT; glucuronosyltransferase [EC:2.4.1.17]
comp18302_c0_seq1	K00128	E1.2.1.3; aldehyde dehydrogenase (NAD+) [EC:1.2.1.3]
comp25388_c0_seq1	K00699	UGT; glucuronosyltransferase [EC:2.4.1.17]
comp46737_c0_seq1	K00699	UGT; glucuronosyltransferase [EC:2.4.1.17]
comp19992_c0_seq1	K01728	E4.2.2.2, pel; pectate lyase [EC:4.2.2.2]
comp149427_c0_seq1	K00699	UGT; glucuronosyltransferase [EC:2.4.1.17]
comp25977_c0_seq1	K00699	UGT; glucuronosyltransferase [EC:2.4.1.17]
comp20047_c0_seq2	K01051	E3.1.1.11; pectinesterase [EC:3.1.1.11]
comp56697_c0_seq1	K00699	UGT; glucuronosyltransferase [EC:2.4.1.17]
comp22467_c0_seq2	K01805	xylA; xylose isomerase [EC:5.3.1.5]
comp27099_c0_seq1	K00128	E1.2.1.3; aldehyde dehydrogenase (NAD+) [EC:1.2.1.3]
comp18245_c0_seq1	K00699	UGT; glucuronosyltransferase [EC:2.4.1.17]
comp17085_c0_seq2	K01728	E4.2.2.2, pel; pectate lyase [EC:4.2.2.2]
comp21351_c0_seq10	K01783	rpe, RPE; ribulose-phosphate 3-epimerase [EC:5.1.3.1]
comp103515_c0_seq1	K01051	E3.1.1.11; pectinesterase [EC:3.1.1.11]
comp7720_c0_seq1	K01051	E3.1.1.11; pectinesterase [EC:3.1.1.11]
comp21451_c1_seq2	K16190	GLCAK; glucuronokinase [EC:2.7.1.43]
comp26104_c2_seq1	K01051	E3.1.1.11; pectinesterase [EC:3.1.1.11]
comp44662_c0_seq1	K00854	xylB, XYLB; xylulokinase [EC:2.7.1.17]
comp16901_c0_seq1	K00128	E1.2.1.3; aldehyde dehydrogenase (NAD+) [EC:1.2.1.3]
comp95188_c0_seq1	K00699	UGT; glucuronosyltransferase [EC:2.4.1.17]
comp7956_c0_seq2	K00699	UGT; glucuronosyltransferase [EC:2.4.1.17]
comp22022_c0_seq10	K12447	USP; UDP-sugar pyrophosphorylase [EC:2.7.7.64]
comp23073_c0_seq1	K00963	UGP2, galU, galF; UTP--glucose-1-phosphate uridylyltransferase [EC:2.7.7.9]
comp20539_c0_seq1	K01728	E4.2.2.2, pel; pectate lyase [EC:4.2.2.2]
comp18333_c0_seq1	K00012	UGDH, ugd; UDPglucose 6-dehydrogenase [EC:1.1.1.22]
comp55657_c0_seq1	K01051	E3.1.1.11; pectinesterase [EC:3.1.1.11]
comp7157_c0_seq1	K01051	E3.1.1.11; pectinesterase [EC:3.1.1.11]
comp217287_c0_seq1	K01184	E3.2.1.15; polygalacturonase [EC:3.2.1.15]
comp6858_c0_seq2	K01728	E4.2.2.2, pel; pectate lyase [EC:4.2.2.2]
comp14395_c0_seq1	K00699	UGT; glucuronosyltransferase [EC:2.4.1.17]
comp19035_c0_seq9	K01051	E3.1.1.11; pectinesterase [EC:3.1.1.11]
comp76210_c0_seq1	K00128	E1.2.1.3; aldehyde dehydrogenase (NAD+) [EC:1.2.1.3]
comp27290_c0_seq1	K00895	E2.7.1.90, pfk; pyrophosphate--fructose-6-phosphate 1-phosphotransferase [EC:2.7.1.90]
comp25858_c0_seq1	K01809	E5.3.1.8, manA; mannose-6-phosphate isomerase [EC:5.3.1.8]
comp27563_c0_seq1	K00847	E2.7.1.4, scrK; fructokinase [EC:2.7.1.4]
comp29428_c0_seq1	K02377	TSTA3, fcl; GDP-L-fucose synthase [EC:1.1.1.271]
comp22134_c0_seq1	K03841	FBP, fbp; fructose-1,6-bisphosphatase I [EC:3.1.3.11]
comp8379_c0_seq1	K00850	pfkA, PFK; 6-phosphofructokinase 1 [EC:2.7.1.11]
comp33977_c0_seq1	K00847	E2.7.1.4, scrK; fructokinase [EC:2.7.1.4]
comp23740_c0_seq1	K01623	ALDO; fructose-bisphosphate aldolase, class I [EC:4.1.2.13]
comp16078_c0_seq1	K01803	TPI, tpiA; triosephosphate isomerase (TIM) [EC:5.3.1.1]
comp233726_c0_seq1	K03841	FBP, fbp; fructose-1,6-bisphosphatase I [EC:3.1.3.11]
comp16756_c0_seq1	K00966	GMPP; mannose-1-phosphate guanylyltransferase [EC:2.7.7.13]
comp18960_c0_seq4	K00850	pfkA, PFK; 6-phosphofructokinase 1 [EC:2.7.1.11]
comp22467_c0_seq2	K01805	xylA; xylose isomerase [EC:5.3.1.5]
comp19154_c0_seq6	K00850	pfkA, PFK; 6-phosphofructokinase 1 [EC:2.7.1.11]
comp23312_c1_seq1	K00895	E2.7.1.90, pfk; pyrophosphate--fructose-6-phosphate 1-phosphotransferase [EC:2.7.1.90]
comp15834_c0_seq1	K01711	gmd, GMDS; GDPmannose 4,6-dehydratase [EC:4.2.1.47]
comp10427_c0_seq1	K17497	PMM; phosphomannomutase [EC:5.4.2.8]
comp14251_c0_seq1	K00966	GMPP; mannose-1-phosphate guanylyltransferase [EC:2.7.7.13]
comp25892_c1_seq1	K00850	pfkA, PFK; 6-phosphofructokinase 1 [EC:2.7.1.11]
comp24165_c1_seq1	K00844	HK; hexokinase [EC:2.7.1.1]
comp10358_c0_seq1	K00008	SORD, gutB; L-iditol 2-dehydrogenase [EC:1.1.1.14]
comp22056_c0_seq1	K00850	pfkA, PFK; 6-phosphofructokinase 1 [EC:2.7.1.11]
comp25350_c0_seq1	K03841	FBP, fbp; fructose-1,6-bisphosphatase I [EC:3.1.3.11]
comp21208_c0_seq11	K01103	PFKFB; 6-phosphofructo-2-kinase / fructose-2,6-bisphosphatase [EC:2.7.1.105 3.1.3.46]
comp27247_c0_seq1	K01803	TPI, tpiA; triosephosphate isomerase (TIM) [EC:5.3.1.1]
comp10265_c0_seq1	K00847	E2.7.1.4, scrK; fructokinase [EC:2.7.1.4]
comp7557_c0_seq1	K01623	ALDO; fructose-bisphosphate aldolase, class I [EC:4.1.2.13]
comp15467_c0_seq1	K00844	HK; hexokinase [EC:2.7.1.1]
comp19420_c0_seq4	K05305	FUK; fucokinase [EC:2.7.1.52]
comp15735_c0_seq1	K01623	ALDO; fructose-bisphosphate aldolase, class I [EC:4.1.2.13]
comp23181_c0_seq1	K00965	galT, GALT; UDPglucose--hexose-1-phosphate uridylyltransferase [EC:2.7.7.12]
comp8379_c0_seq1	K00850	pfkA, PFK; 6-phosphofructokinase 1 [EC:2.7.1.11]
comp79507_c0_seq1	K01193	E3.2.1.26, sacA; beta-fructofuranosidase [EC:3.2.1.26]
comp24196_c0_seq1	K06617	E2.4.1.82; raffinose synthase [EC:2.4.1.82]
comp18765_c0_seq1	K01784	galE, GALE; UDP-glucose 4-epimerase [EC:5.1.3.2]
comp18629_c0_seq1	K06617	E2.4.1.82; raffinose synthase [EC:2.4.1.82]
comp22561_c0_seq2	K07407	E3.2.1.22B, galA, rafA; alpha-galactosidase [EC:3.2.1.22]
comp26201_c0_seq1	K12309	GLB1, ELNR1; beta-galactosidase [EC:3.2.1.23]
comp18960_c0_seq4	K00850	pfkA, PFK; 6-phosphofructokinase 1 [EC:2.7.1.11]
comp25698_c0_seq1	K00849	galK; galactokinase [EC:2.7.1.6]
comp23390_c0_seq3	K06617	E2.4.1.82; raffinose synthase [EC:2.4.1.82]
comp19154_c0_seq6	K00850	pfkA, PFK; 6-phosphofructokinase 1 [EC:2.7.1.11]
comp46148_c0_seq1	K06611	E2.4.1.67; stachyose synthetase [EC:2.4.1.67]
comp11770_c1_seq1	K01835	pgm; phosphoglucomutase [EC:5.4.2.2]
comp25892_c1_seq1	K00850	pfkA, PFK; 6-phosphofructokinase 1 [EC:2.7.1.11]
comp24165_c1_seq1	K00844	HK; hexokinase [EC:2.7.1.1]
comp22056_c0_seq1	K00850	pfkA, PFK; 6-phosphofructokinase 1 [EC:2.7.1.11]
comp25107_c0_seq1	K01193	E3.2.1.26, sacA; beta-fructofuranosidase [EC:3.2.1.26]
comp23073_c0_seq1	K00963	UGP2, galU, galF; UTP--glucose-1-phosphate uridylyltransferase [EC:2.7.7.9]
comp20803_c0_seq2	K07407	E3.2.1.22B, galA, rafA; alpha-galactosidase [EC:3.2.1.22]
comp23926_c0_seq2	K06617	E2.4.1.82; raffinose synthase [EC:2.4.1.82]
comp6780_c0_seq2	K01193	E3.2.1.26, sacA; beta-fructofuranosidase [EC:3.2.1.26]
comp25584_c0_seq15	K01835	pgm; phosphoglucomutase [EC:5.4.2.2]
comp15467_c0_seq1	K00844	HK; hexokinase [EC:2.7.1.1]
comp17233_c0_seq2	K01193	E3.2.1.26, sacA; beta-fructofuranosidase [EC:3.2.1.26]
comp17937_c0_seq1	K01187	E3.2.1.20, malZ; alpha-glucosidase [EC:3.2.1.20]
comp7532_c0_seq1	K01190	lacZ; beta-galactosidase [EC:3.2.1.23]
comp25723_c1_seq17	K00849	galK; galactokinase [EC:2.7.1.6]
comp2197_c0_seq1	K00434	E1.11.1.11; L-ascorbate peroxidase [EC:1.11.1.11]
comp21645_c1_seq2	K00699	UGT; glucuronosyltransferase [EC:2.4.1.17]
comp18302_c0_seq1	K00128	E1.2.1.3; aldehyde dehydrogenase (NAD+) [EC:1.2.1.3]
comp25388_c0_seq1	K00699	UGT; glucuronosyltransferase [EC:2.4.1.17]
comp46737_c0_seq1	K00699	UGT; glucuronosyltransferase [EC:2.4.1.17]
comp149427_c0_seq1	K00699	UGT; glucuronosyltransferase [EC:2.4.1.17]
comp25977_c0_seq1	K00699	UGT; glucuronosyltransferase [EC:2.4.1.17]
comp25512_c1_seq9	K14085	ALDH7A1; aldehyde dehydrogenase family 7 member A1 [EC:1.2.1.31 1.2.1.8 1.2.1.3]
comp20040_c0_seq1	K08232	E1.6.5.4; monodehydroascorbate reductase (NADH) [EC:1.6.5.4]
comp56697_c0_seq1	K00699	UGT; glucuronosyltransferase [EC:2.4.1.17]
comp20066_c1_seq5	K00103	E1.1.3.8; L-gulonolactone oxidase [EC:1.1.3.8]
comp27099_c0_seq1	K00128	E1.2.1.3; aldehyde dehydrogenase (NAD+) [EC:1.2.1.3]
comp18245_c0_seq1	K00699	UGT; glucuronosyltransferase [EC:2.4.1.17]
comp14531_c0_seq1	K00434	E1.11.1.11; L-ascorbate peroxidase [EC:1.11.1.11]
comp189338_c0_seq1	K00469	MIOX; inositol oxygenase [EC:1.13.99.1]
comp20887_c0_seq1	K10047	VTC4; inositol-phosphate phosphatase / L-galactose 1-phosphate phosphatase [EC:3.1.3.25 3.1.3.-]
comp21432_c0_seq1	K08232	E1.6.5.4; monodehydroascorbate reductase (NADH) [EC:1.6.5.4]
comp21451_c1_seq2	K16190	GLCAK; glucuronokinase [EC:2.7.1.43]
comp18830_c0_seq1	K17744	GalDH; L-galactose dehydrogenase [EC:1.1.1.316]
comp68578_c0_seq1	K00469	MIOX; inositol oxygenase [EC:1.13.99.1]
comp27444_c0_seq1	K08232	E1.6.5.4; monodehydroascorbate reductase (NADH) [EC:1.6.5.4]
comp16901_c0_seq1	K00128	E1.2.1.3; aldehyde dehydrogenase (NAD+) [EC:1.2.1.3]
comp21362_c0_seq1	K00434	E1.11.1.11; L-ascorbate peroxidase [EC:1.11.1.11]
comp20401_c0_seq1	K00423	E1.10.3.3; L-ascorbate oxidase [EC:1.10.3.3]
comp95188_c0_seq1	K00699	UGT; glucuronosyltransferase [EC:2.4.1.17]
comp7956_c0_seq2	K00699	UGT; glucuronosyltransferase [EC:2.4.1.17]
comp22022_c0_seq10	K12447	USP; UDP-sugar pyrophosphorylase [EC:2.7.7.64]
comp18333_c0_seq1	K00012	UGDH, ugd; UDPglucose 6-dehydrogenase [EC:1.1.1.22]
comp19190_c0_seq1	K00225	GLDH; L-galactono-1,4-lactone dehydrogenase [EC:1.3.2.3]
comp7281_c0_seq1	K00434	E1.11.1.11; L-ascorbate peroxidase [EC:1.11.1.11]
comp23685_c0_seq1	K10046	GME; GDP-D-mannose 3', 5'-epimerase [EC:5.1.3.18 5.1.3.-]
comp18593_c0_seq1	K00434	E1.11.1.11; L-ascorbate peroxidase [EC:1.11.1.11]
comp14395_c0_seq1	K00699	UGT; glucuronosyltransferase [EC:2.4.1.17]
comp7250_c0_seq1	K14190	VTC2_5; GDP-L-galactose phosphorylase [EC:2.7.7.69]
comp76210_c0_seq1	K00128	E1.2.1.3; aldehyde dehydrogenase (NAD+) [EC:1.2.1.3]
comp24838_c0_seq1	K01962	accA; acetyl-CoA carboxylase carboxyl transferase subunit alpha [EC:6.4.1.2]
comp31080_c0_seq1	K03921	DESA1; acyl-[acyl-carrier-protein] desaturase [EC:1.14.19.2]
comp15650_c0_seq1	K00059	fabG; 3-oxoacyl-[acyl-carrier protein] reductase [EC:1.1.1.100]
comp19714_c0_seq2	K10782	FATA; fatty acyl-ACP thioesterase A [EC:3.1.2.14 3.1.2.-]
comp19554_c0_seq1	K00059	fabG; 3-oxoacyl-[acyl-carrier protein] reductase [EC:1.1.1.100]
comp31688_c0_seq1	K00648	fabH; 3-oxoacyl-[acyl-carrier-protein] synthase III [EC:2.3.1.180]
comp18472_c0_seq2	K09458	fabF; 3-oxoacyl-[acyl-carrier-protein] synthase II [EC:2.3.1.179]
comp13125_c0_seq1	K10781	FATB; fatty acyl-ACP thioesterase B [EC:3.1.2.14 3.1.2.-]
comp20374_c0_seq1	K09458	fabF; 3-oxoacyl-[acyl-carrier-protein] synthase II [EC:2.3.1.179]
comp18930_c0_seq1	K00208	fabI; enoyl-[acyl-carrier protein] reductase I [EC:1.3.1.9 1.3.1.10]
comp7132_c0_seq1	K03921	DESA1; acyl-[acyl-carrier-protein] desaturase [EC:1.14.19.2]
comp14354_c0_seq1	K00645	fabD; [acyl-carrier-protein] S-malonyltransferase [EC:2.3.1.39]
comp28012_c0_seq1	K00208	fabI; enoyl-[acyl-carrier protein] reductase I [EC:1.3.1.9 1.3.1.10]
comp16606_c0_seq1	K00059	fabG; 3-oxoacyl-[acyl-carrier protein] reductase [EC:1.1.1.100]
comp16617_c0_seq5	K01962	accA; acetyl-CoA carboxylase carboxyl transferase subunit alpha [EC:6.4.1.2]
comp24919_c5_seq13	K11262	ACAC; acetyl-CoA carboxylase / biotin carboxylase [EC:6.4.1.2 6.3.4.14]
comp18822_c0_seq2	K02372	fabZ; 3-hydroxyacyl-[acyl-carrier-protein] dehydratase [EC:4.2.1.59]
comp13970_c0_seq1	K01961	accC; acetyl-CoA carboxylase, biotin carboxylase subunit [EC:6.4.1.2 6.3.4.14]
comp13644_c0_seq1	K03921	DESA1; acyl-[acyl-carrier-protein] desaturase [EC:1.14.19.2]
comp23717_c0_seq13	K09458	fabF; 3-oxoacyl-[acyl-carrier-protein] synthase II [EC:2.3.1.179]
comp18587_c0_seq1	K02372	fabZ; 3-hydroxyacyl-[acyl-carrier-protein] dehydratase [EC:4.2.1.59]
comp24503_c2_seq2	K01074	PPT; palmitoyl-protein thioesterase [EC:3.1.2.22]
comp73298_c0_seq1	K15397	KCS; 3-ketoacyl-CoA synthase [EC:2.3.1.199]
comp13427_c0_seq1	K15397	KCS; 3-ketoacyl-CoA synthase [EC:2.3.1.199]
comp37239_c0_seq1	K01074	PPT; palmitoyl-protein thioesterase [EC:3.1.2.22]
comp21367_c0_seq5	K15397	KCS; 3-ketoacyl-CoA synthase [EC:2.3.1.199]
comp89557_c0_seq1	K15397	KCS; 3-ketoacyl-CoA synthase [EC:2.3.1.199]
comp16526_c0_seq1	K10251	HSD17B12, KAR, IFA38; 17beta-estradiol 17-dehydrogenase / very-long-chain 3-oxoacyl-CoA reductase [EC:1.1.1.62 1.1.1.330]
comp18846_c0_seq1	K10258	TER, TSC13, CER10; very-long-chain enoyl-CoA reductase [EC:1.3.1.93]
comp23221_c0_seq1	K15397	KCS; 3-ketoacyl-CoA synthase [EC:2.3.1.199]
comp7422_c0_seq1	K07512	MECR, NRBF1; mitochondrial trans-2-enoyl-CoA reductase [EC:1.3.1.38]
comp20565_c0_seq1	K01068	ACOT1_2_4; acyl-coenzyme A thioesterase 1/2/4 [EC:3.1.2.2]
comp7613_c0_seq1	K10251	HSD17B12, KAR, IFA38; 17beta-estradiol 17-dehydrogenase / very-long-chain 3-oxoacyl-CoA reductase [EC:1.1.1.62 1.1.1.330]
comp8063_c0_seq1	K10703	PHS1, PAS2; very-long-chain (3R)-3-hydroxyacyl-[acyl-carrier protein] dehydratase [EC:4.2.1.134]
comp20589_c0_seq1	K10258	TER, TSC13, CER10; very-long-chain enoyl-CoA reductase [EC:1.3.1.93]
comp24807_c0_seq2	K15397	KCS; 3-ketoacyl-CoA synthase [EC:2.3.1.199]
comp16345_c0_seq1	K15397	KCS; 3-ketoacyl-CoA synthase [EC:2.3.1.199]
comp13109_c1_seq1	K10703	PHS1, PAS2; very-long-chain (3R)-3-hydroxyacyl-[acyl-carrier protein] dehydratase [EC:4.2.1.134]
comp12512_c1_seq2	K01897	ACSL, fadD; long-chain acyl-CoA synthetase [EC:6.2.1.3]
comp12034_c0_seq1	K00626	E2.3.1.9, atoB; acetyl-CoA C-acetyltransferase [EC:2.3.1.9]
comp18302_c0_seq1	K00128	E1.2.1.3; aldehyde dehydrogenase (NAD+) [EC:1.2.1.3]
comp29831_c0_seq1	K01897	ACSL, fadD; long-chain acyl-CoA synthetase [EC:6.2.1.3]
comp24770_c0_seq2	K01897	ACSL, fadD; long-chain acyl-CoA synthetase [EC:6.2.1.3]
comp16013_c0_seq1	K00121	frmA, ADH5, adhC; S-(hydroxymethyl)glutathione dehydrogenase / alcohol dehydrogenase [EC:1.1.1.284 1.1.1.1]
comp25512_c1_seq9	K14085	ALDH7A1; aldehyde dehydrogenase family 7 member A1 [EC:1.2.1.31 1.2.1.8 1.2.1.3]
comp25944_c0_seq1	K01897	ACSL, fadD; long-chain acyl-CoA synthetase [EC:6.2.1.3]
comp22102_c0_seq1	K00232	E1.3.3.6, ACOX1, ACOX3; acyl-CoA oxidase [EC:1.3.3.6]
comp15655_c0_seq1	K10527	MFP2; enoyl-CoA hydratase/3-hydroxyacyl-CoA dehydrogenase [EC:4.2.1.17 1.1.1.35 1.1.1.211]
comp11566_c0_seq1	K01897	ACSL, fadD; long-chain acyl-CoA synthetase [EC:6.2.1.3]
comp27099_c0_seq1	K00128	E1.2.1.3; aldehyde dehydrogenase (NAD+) [EC:1.2.1.3]
comp16100_c0_seq1	K07513	ACAA1; acetyl-CoA acyltransferase 1 [EC:2.3.1.16]
comp20964_c0_seq1	K01897	ACSL, fadD; long-chain acyl-CoA synthetase [EC:6.2.1.3]
comp33661_c0_seq1	K01897	ACSL, fadD; long-chain acyl-CoA synthetase [EC:6.2.1.3]
comp11450_c0_seq1	K00001	E1.1.1.1, adh; alcohol dehydrogenase [EC:1.1.1.1]
comp25695_c1_seq20	K01897	ACSL, fadD; long-chain acyl-CoA synthetase [EC:6.2.1.3]
comp18038_c0_seq1	K10527	MFP2; enoyl-CoA hydratase/3-hydroxyacyl-CoA dehydrogenase [EC:4.2.1.17 1.1.1.35 1.1.1.211]
comp16901_c0_seq1	K00128	E1.2.1.3; aldehyde dehydrogenase (NAD+) [EC:1.2.1.3]
comp27876_c0_seq1	K00121	frmA, ADH5, adhC; S-(hydroxymethyl)glutathione dehydrogenase / alcohol dehydrogenase [EC:1.1.1.284 1.1.1.1]
comp24999_c0_seq1	K00249	ACADM, acd; acyl-CoA dehydrogenase [EC:1.3.8.7]
comp24815_c1_seq1	K00232	E1.3.3.6, ACOX1, ACOX3; acyl-CoA oxidase [EC:1.3.3.6]
comp30125_c0_seq1	K00232	E1.3.3.6, ACOX1, ACOX3; acyl-CoA oxidase [EC:1.3.3.6]
comp19238_c0_seq1	K00232	E1.3.3.6, ACOX1, ACOX3; acyl-CoA oxidase [EC:1.3.3.6]
comp6848_c0_seq1	K00001	E1.1.1.1, adh; alcohol dehydrogenase [EC:1.1.1.1]
comp573_c0_seq2	K00121	frmA, ADH5, adhC; S-(hydroxymethyl)glutathione dehydrogenase / alcohol dehydrogenase [EC:1.1.1.284 1.1.1.1]
comp76210_c0_seq1	K00128	E1.2.1.3; aldehyde dehydrogenase (NAD+) [EC:1.2.1.3]
comp12034_c0_seq1	K00626	E2.3.1.9, atoB; acetyl-CoA C-acetyltransferase [EC:2.3.1.9]
comp22162_c0_seq2	K01640	E4.1.3.4, HMGCL, hmgL; hydroxymethylglutaryl-CoA lyase [EC:4.1.3.4]
comp24731_c0_seq3	K01641	E2.3.3.10; hydroxymethylglutaryl-CoA synthase [EC:2.3.3.10]
comp12619_c0_seq1	K15400	HHT1; omega-hydroxypalmitate O-feruloyl transferase [EC:2.3.1.188]
comp23765_c0_seq1	K15402	CYP86B1; cytochrome P450, family 86, subfamily B, polypeptide 1 (fatty acid omega-hydroxylase) [EC:1.14.-.-]
comp24047_c0_seq1	K15404	K15404, CER1; aldehyde decarbonylase [EC:4.1.99.5]
comp20069_c0_seq1	K15403	ACE, HTH; fatty acid omega-hydroxy dehydrogenase [EC:1.1.-.-]
comp18849_c0_seq4	K13356	FAR; fatty acyl-CoA reductase [EC:1.2.1.-]
comp16174_c0_seq3	K15398	CYP86A4S; cytochrome P450, family 86, subfamily A, polypeptide 2/4/7/8 (fatty acid omega-hydroxylase) [EC:1.14.-.-]
comp40350_c0_seq1	K15398	CYP86A4S; cytochrome P450, family 86, subfamily A, polypeptide 2/4/7/8 (fatty acid omega-hydroxylase) [EC:1.14.-.-]
comp24661_c1_seq1	K00559	E2.1.1.41, SMT1, ERG6; sterol 24-C-methyltransferase [EC:2.1.1.41]
comp26220_c0_seq1	K05917	CYP51; cytochrome P450, family 51 (sterol 14-demethylase) [EC:1.14.13.70]
comp22994_c0_seq1	K00213	DHCR7; 7-dehydrocholesterol reductase [EC:1.3.1.21]
comp22081_c1_seq1	K08242	E2.1.1.143; 24-methylenesterol C-methyltransferase [EC:2.1.1.143]
comp13816_c0_seq3	K08246	CPI1; cycloeucalenol cycloisomerase [EC:5.5.1.9]
comp11846_c0_seq1	K00227	SC5DL, ERG3; lathosterol oxidase [EC:1.14.21.6]
comp13672_c0_seq1	K01824	EBP; cholestenol delta-isomerase [EC:5.3.3.5]
comp30401_c0_seq1	K14423	SMO1; 4,4-dimethyl-9beta,19-cyclopropylsterol-4alpha-methyl oxidase [EC:1.14.13.72]
comp24127_c0_seq6	K00511	SQLE, ERG1; squalene monooxygenase [EC:1.14.13.132]
comp13423_c0_seq1	K14424	SMO2; 4-alpha-methyl-delta7-sterol-4alpha-methyl oxidase [EC:1.14.13.72]
comp7298_c0_seq1	K09828	DHCR24; delta24-sterol reductase [EC:1.3.1.72]
comp20266_c0_seq1	K00801	FDFT1; farnesyl-diphosphate farnesyltransferase [EC:2.5.1.21]
comp21170_c0_seq4	K07748	E1.1.1.170, NSDHL, ERG26; sterol-4alpha-carboxylate 3-dehydrogenase (decarboxylating) [EC:1.1.1.170]
comp22049_c0_seq1	K14674	TGL4; TAG lipase / steryl ester hydrolase / phospholipase A2 / LPA acyltransferase [EC:3.1.1.3 3.1.1.13 3.1.1.4 2.3.1.51]
comp15500_c1_seq3	K01853	E5.4.99.8; cycloartenol synthase [EC:5.4.99.8]
comp17008_c0_seq1	K00815	TAT; tyrosine aminotransferase [EC:2.6.1.5]
comp18269_c0_seq1	K01904	E6.2.1.12; 4-coumarate--CoA ligase [EC:6.2.1.12]
comp18408_c0_seq1	K00815	TAT; tyrosine aminotransferase [EC:2.6.1.5]
comp24280_c0_seq1	K06126	COQ6; ubiquinone biosynthesis monooxygenase Coq6 [EC:1.14.13.-]
comp52369_c0_seq1	K01904	E6.2.1.12; 4-coumarate--CoA ligase [EC:6.2.1.12]
comp25102_c0_seq38	K14759	PHYLLO; isochorismate synthase / 2-succinyl-5-enolpyruvyl-6-hydroxy-3-cyclohexene-1-carboxylate synthase / 2-succinyl-6-hydroxy-2,4-cyclohexadiene-1-carboxylate synthase / O-succinylbenzoate synthase [EC:5.4.4.2 2.2.1.9 4.2.99.20 4.2.1.113]
comp22505_c0_seq1	K02548	menA; 1,4-dihydroxy-2-naphthoate octaprenyltransferase [EC:2.5.1.74 2.5.1.-]
comp20810_c0_seq4	K03183	ubiE; ubiquinone/menaquinone biosynthesis methyltransferase [EC:2.1.1.163 2.1.1.201]
comp24329_c0_seq1	K00457	HPD, hppD; 4-hydroxyphenylpyruvate dioxygenase [EC:1.13.11.27]
comp10405_c0_seq2	K01904	E6.2.1.12; 4-coumarate--CoA ligase [EC:6.2.1.12]
comp22937_c0_seq6	K14760	AAE14; acyl-activating enzyme 14 [EC:6.2.1.26]
comp17318_c0_seq1	K00815	TAT; tyrosine aminotransferase [EC:2.6.1.5]
comp21845_c0_seq4	K05928	E2.1.1.95; tocopherol O-methyltransferase [EC:2.1.1.95]
comp23762_c0_seq1	K00591	COQ3; hexaprenyldihydroxybenzoate methyltransferase [EC:2.1.1.114]
comp14024_c0_seq1	K01661	menB; naphthoate synthase [EC:4.1.3.36]
comp16971_c0_seq4	K01904	E6.2.1.12; 4-coumarate--CoA ligase [EC:6.2.1.12]
comp22316_c0_seq2	K06125	COQ2; 4-hydroxybenzoate hexaprenyltransferase [EC:2.5.1.-]
comp10081_c0_seq2	K02552	menF; menaquinone-specific isochorismate synthase [EC:5.4.4.2]
comp24324_c0_seq1	K06127	COQ5; ubiquinone biosynthesis methyltransferase [EC:2.1.1.201]
comp21645_c1_seq2	K00699	UGT; glucuronosyltransferase [EC:2.4.1.17]
comp25388_c0_seq1	K00699	UGT; glucuronosyltransferase [EC:2.4.1.17]
comp46737_c0_seq1	K00699	UGT; glucuronosyltransferase [EC:2.4.1.17]
comp149427_c0_seq1	K00699	UGT; glucuronosyltransferase [EC:2.4.1.17]
comp25977_c0_seq1	K00699	UGT; glucuronosyltransferase [EC:2.4.1.17]
comp56697_c0_seq1	K00699	UGT; glucuronosyltransferase [EC:2.4.1.17]
comp20685_c0_seq1	K07408	CYP1A1; cytochrome P450, family 1, subfamily A, polypeptide 1 [EC:1.14.14.1]
comp18245_c0_seq1	K00699	UGT; glucuronosyltransferase [EC:2.4.1.17]
comp16526_c0_seq1	K10251	HSD17B12, KAR, IFA38; 17beta-estradiol 17-dehydrogenase / very-long-chain 3-oxoacyl-CoA reductase [EC:1.1.1.62 1.1.1.330]
comp50189_c0_seq1	K00512	CYP17A; cytochrome P450, family 17, subfamily A (steroid 17alpha-monooxygenase/17alpha-hydroxyprogesterone aldolase) [EC:1.14.99.9 4.1.2.30]
comp7613_c0_seq1	K10251	HSD17B12, KAR, IFA38; 17beta-estradiol 17-dehydrogenase / very-long-chain 3-oxoacyl-CoA reductase [EC:1.1.1.62 1.1.1.330]
comp95188_c0_seq1	K00699	UGT; glucuronosyltransferase [EC:2.4.1.17]
comp7956_c0_seq2	K00699	UGT; glucuronosyltransferase [EC:2.4.1.17]
comp10168_c0_seq1	K00512	CYP17A; cytochrome P450, family 17, subfamily A (steroid 17alpha-monooxygenase/17alpha-hydroxyprogesterone aldolase) [EC:1.14.99.9 4.1.2.30]
comp14395_c0_seq1	K00699	UGT; glucuronosyltransferase [EC:2.4.1.17]
comp90130_c0_seq1	K07408	CYP1A1; cytochrome P450, family 1, subfamily A, polypeptide 1 [EC:1.14.14.1]
comp29832_c0_seq1	K02148	ATPeVC, ATP6C; V-type H+-transporting ATPase subunit C [EC:3.6.3.14]
comp7543_c0_seq1	K02150	ATPeVE, ATP6E; V-type H+-transporting ATPase subunit E [EC:3.6.3.14]
comp22520_c0_seq1	K03936	NDUFS3; NADH dehydrogenase (ubiquinone) Fe-S protein 3 [EC:1.6.5.3 1.6.99.3]
comp24076_c1_seq11	K02123	ATPVI, ntpI; V-type H+-transporting ATPase subunit I [EC:3.6.3.14]
comp20978_c0_seq1	K01535	E3.6.3.6; H+-transporting ATPase [EC:3.6.3.6]
comp24486_c0_seq1	K02133	ATPeF1B, ATP5B; F-type H+-transporting ATPase subunit beta [EC:3.6.3.14]
comp20837_c1_seq1	K01507	ppa; inorganic pyrophosphatase [EC:3.6.1.1]
comp25243_c0_seq1	K01507	ppa; inorganic pyrophosphatase [EC:3.6.1.1]
comp7437_c0_seq1	K02140	ATPeFG, ATP5L; F-type H+-transporting ATPase subunit g [EC:3.6.3.14]
comp15542_c0_seq1	K02140	ATPeFG, ATP5L; F-type H+-transporting ATPase subunit g [EC:3.6.3.14]
comp18773_c0_seq1	K03941	NDUFS8; NADH dehydrogenase (ubiquinone) Fe-S protein 8 [EC:1.6.5.3 1.6.99.3]
comp18113_c0_seq1	K00234	SDHA, SDH1; succinate dehydrogenase (ubiquinone) flavoprotein subunit [EC:1.3.5.1]
comp26744_c0_seq1	K02134	ATPeF1D, ATP5D; F-type H+-transporting ATPase subunit delta [EC:3.6.3.14]
comp28017_c0_seq1	K00411	UQCRFS1, RIP1, petA; ubiquinol-cytochrome c reductase iron-sulfur subunit [EC:1.10.2.2]
comp7226_c0_seq1	K03940	NDUFS7; NADH dehydrogenase (ubiquinone) Fe-S protein 7 [EC:1.6.5.3 1.6.99.3]
comp23593_c1_seq1	K02155	ATPeVPL, ATP6L; V-type H+-transporting ATPase 16kDa proteolipid subunit [EC:3.6.3.14]
comp27803_c0_seq1	K01507	ppa; inorganic pyrophosphatase [EC:3.6.1.1]
comp6904_c0_seq1	K02113	ATPF1D, atpH; F-type H+-transporting ATPase subunit delta [EC:3.6.3.14]
comp15108_c0_seq1	K00235	SDHB, SDH2; succinate dehydrogenase (ubiquinone) iron-sulfur subunit [EC:1.3.5.1]
comp16359_c1_seq1	K02152	ATPeVG, ATP6G1; V-type H+-transporting ATPase subunit G [EC:3.6.3.14]
comp25981_c1_seq52	K02144	ATPeV54kD; V-type H+-transporting ATPase 54 kD subunit [EC:3.6.3.14]
comp12315_c0_seq2	K02115	ATPF1G, atpG; F-type H+-transporting ATPase subunit gamma [EC:3.6.3.14]
comp19585_c0_seq1	K02111	ATPF1A, atpA; F-type H+-transporting ATPase subunit alpha [EC:3.6.3.14]
comp7857_c0_seq2	K02149	ATPeVD, ATP6M; V-type H+-transporting ATPase subunit D [EC:3.6.3.14]
comp16568_c0_seq1	K02137	ATPeF1O, ATP5O; F-type H+-transporting ATPase oligomycin sensitivity conferral protein [EC:3.6.3.14]
comp8280_c0_seq1	K02126	ATPeF0A, MTATP6; F-type H+-transporting ATPase subunit a [EC:3.6.3.14]
comp8964_c0_seq1	K03885	ndh; NADH dehydrogenase [EC:1.6.99.3]
comp16026_c1_seq2	K01507	ppa; inorganic pyrophosphatase [EC:3.6.1.1]
comp15713_c1_seq1	K02147	ATPeVB, ATP6B1; V-type H+-transporting ATPase subunit B [EC:3.6.3.14]
comp31212_c0_seq1	K03661	ATPeVPF, ATP6F; V-type H+-transporting ATPase 21kDa proteolipid subunit [EC:3.6.3.14]
comp20136_c0_seq1	K03885	ndh; NADH dehydrogenase [EC:1.6.99.3]
comp27251_c0_seq1	K02138	ATPeFD, ATP5H; F-type H+-transporting ATPase subunit d [EC:3.6.3.14]
comp28024_c0_seq1	K02134	ATPeF1D, ATP5D; F-type H+-transporting ATPase subunit delta [EC:3.6.3.14]
comp26269_c0_seq3	K03935	NDUFS2; NADH dehydrogenase (ubiquinone) Fe-S protein 2 [EC:1.6.5.3 1.6.99.3]
comp26385_c0_seq29	K01507	ppa; inorganic pyrophosphatase [EC:3.6.1.1]
comp28311_c0_seq1	K02146	ATPeVAC39, ATP6D; V-type H+-transporting ATPase subunit AC39 [EC:3.6.3.14]
comp17109_c0_seq2	K03885	ndh; NADH dehydrogenase [EC:1.6.99.3]
comp11325_c0_seq1	K03943	NDUFV2; NADH dehydrogenase (ubiquinone) flavoprotein 2 [EC:1.6.5.3 1.6.99.3]
comp18747_c0_seq3	K01535	E3.6.3.6; H+-transporting ATPase [EC:3.6.3.6]
comp14995_c0_seq1	K03934	NDUFS1; NADH dehydrogenase (ubiquinone) Fe-S protein 1 [EC:1.6.5.3 1.6.99.3]
comp26404_c1_seq9	K03883	ND5; NADH-ubiquinone oxidoreductase chain 5 [EC:1.6.5.3]
comp28049_c0_seq1	K02145	ATPeVA, ATP6A1; V-type H+-transporting ATPase subunit A [EC:3.6.3.14]
comp17309_c0_seq1	K02115	ATPF1G, atpG; F-type H+-transporting ATPase subunit gamma [EC:3.6.3.14]
comp7169_c0_seq1	K01507	ppa; inorganic pyrophosphatase [EC:3.6.1.1]
comp28095_c0_seq1	K03942	NDUFV1; NADH dehydrogenase (ubiquinone) flavoprotein 1 [EC:1.6.5.3 1.6.99.3]
comp23469_c0_seq1	K02112	ATPF1B, atpD; F-type H+-transporting ATPase subunit beta [EC:3.6.3.14]
comp19771_c0_seq1	K02152	ATPeVG, ATP6G1; V-type H+-transporting ATPase subunit G [EC:3.6.3.14]
comp15779_c0_seq1	K02154	ATPeVI, ATP6N1A; V-type H+-transporting ATPase subunit I [EC:3.6.3.14]
comp19585_c1_seq2	K02109	ATPF0B, atpF; F-type H+-transporting ATPase subunit b [EC:3.6.3.14]
comp26210_c0_seq13	K03881	ND4; NADH-ubiquinone oxidoreductase chain 4 [EC:1.6.5.3]
comp21206_c0_seq1	K02151	ATPeVF, ATP6S14; V-type H+-transporting ATPase subunit F [EC:3.6.3.14]
comp33979_c0_seq1	K02109	ATPF0B, atpF; F-type H+-transporting ATPase subunit b [EC:3.6.3.14]
comp12075_c0_seq1	K00411	UQCRFS1, RIP1, petA; ubiquinol-cytochrome c reductase iron-sulfur subunit [EC:1.10.2.2]
comp18865_c0_seq1	K05577	ndhF; NAD(P)H-quinone oxidoreductase subunit 5 [EC:1.6.5.3]
comp46814_c0_seq1	K02641	petH; ferredoxin--NADP+ reductase [EC:1.18.1.2]
comp6904_c0_seq1	K02113	ATPF1D, atpH; F-type H+-transporting ATPase subunit delta [EC:3.6.3.14]
comp12315_c0_seq2	K02115	ATPF1G, atpG; F-type H+-transporting ATPase subunit gamma [EC:3.6.3.14]
comp19585_c0_seq1	K02111	ATPF1A, atpA; F-type H+-transporting ATPase subunit alpha [EC:3.6.3.14]
comp17309_c0_seq1	K02115	ATPF1G, atpG; F-type H+-transporting ATPase subunit gamma [EC:3.6.3.14]
comp23469_c0_seq1	K02112	ATPF1B, atpD; F-type H+-transporting ATPase subunit beta [EC:3.6.3.14]
comp19585_c1_seq2	K02109	ATPF0B, atpF; F-type H+-transporting ATPase subunit b [EC:3.6.3.14]
comp6913_c0_seq1	K02636	petC; cytochrome b6-f complex iron-sulfur subunit [EC:1.10.9.1]
comp33979_c0_seq1	K02109	ATPF0B, atpF; F-type H+-transporting ATPase subunit b [EC:3.6.3.14]
comp21514_c0_seq1	K01081	E3.1.3.5; 5'-nucleotidase [EC:3.1.3.5]
comp19193_c0_seq1	K00940	E2.7.4.6, ndk; nucleoside-diphosphate kinase [EC:2.7.4.6]
comp41872_c0_seq1	K00942	E2.7.4.8, gmk; guanylate kinase [EC:2.7.4.8]
comp13112_c0_seq1	K01466	allB; allantoinase [EC:3.5.2.5]
comp24175_c0_seq2	K02327	POLD1; DNA polymerase delta subunit 1 [EC:2.7.7.7]
comp12010_c0_seq1	K01939	E6.3.4.4, purA; adenylosuccinate synthase [EC:6.3.4.4]
comp22818_c1_seq2	K00940	E2.7.4.6, ndk; nucleoside-diphosphate kinase [EC:2.7.4.6]
comp21247_c0_seq1	K13811	PAPSS; 3'-phosphoadenosine 5'-phosphosulfate synthase [EC:2.7.7.4 2.7.1.25]
comp24148_c0_seq3	K00873	PK, pyk; pyruvate kinase [EC:2.7.1.40]
comp25628_c1_seq1	K01509	E3.6.1.3; adenosinetriphosphatase [EC:3.6.1.3]
comp18445_c0_seq8	K14977	ylbA; ureidoglycine aminohydrolase [EC:3.5.3.-]
comp26195_c3_seq2	K01933	purM; phosphoribosylformylglycinamidine cyclo-ligase [EC:6.3.3.1]
comp22537_c0_seq1	K06928	K06928; nucleoside-triphosphatase THEP1 [EC:3.6.1.15]
comp24526_c0_seq3	K00873	PK, pyk; pyruvate kinase [EC:2.7.1.40]
comp20225_c0_seq3	K00873	PK, pyk; pyruvate kinase [EC:2.7.1.40]
comp6786_c0_seq2	K00873	PK, pyk; pyruvate kinase [EC:2.7.1.40]
comp22427_c0_seq6	K00948	PRPS, prsA; ribose-phosphate pyrophosphokinase [EC:2.7.6.1]
comp11770_c1_seq1	K01835	pgm; phosphoglucomutase [EC:5.4.2.2]
comp18178_c0_seq1	K00873	PK, pyk; pyruvate kinase [EC:2.7.1.40]
comp20499_c0_seq1	K03021	RPC2, POLR3B; DNA-directed RNA polymerase III subunit RPC2 [EC:2.7.7.6]
comp22912_c0_seq3	K00088	guaB; IMP dehydrogenase [EC:1.1.1.205]
comp13237_c0_seq2	K02083	allC; allantoate deiminase [EC:3.5.3.9]
comp25661_c0_seq1	K00106	XDH; xanthine dehydrogenase/oxidase [EC:1.17.1.4 1.17.3.2]
comp21562_c0_seq1	K00856	E2.7.1.20, ADK; adenosine kinase [EC:2.7.1.20]
comp19418_c0_seq2	K02685	PRI2; DNA primase large subunit [EC:2.7.7.-]
comp25359_c0_seq1	K02335	DPO1, polA; DNA polymerase I [EC:2.7.7.7]
comp13007_c0_seq1	K00873	PK, pyk; pyruvate kinase [EC:2.7.1.40]
comp29956_c0_seq1	K01510	ENTPD1_3_8; apyrase [EC:3.6.1.5]
comp18051_c0_seq1	K03046	rpoC; DNA-directed RNA polymerase subunit beta' [EC:2.7.7.6]
comp20295_c0_seq1	K13811	PAPSS; 3'-phosphoadenosine 5'-phosphosulfate synthase [EC:2.7.7.4 2.7.1.25]
comp25786_c0_seq3	K02324	POLE1; DNA polymerase epsilon subunit 1 [EC:2.7.7.7]
comp19934_c0_seq2	K00939	E2.7.4.3, adk; adenylate kinase [EC:2.7.4.3]
comp26360_c1_seq1	K03010	RPB2, POLR2B; DNA-directed RNA polymerase II subunit RPB2 [EC:2.7.7.6]
comp22253_c0_seq1	K00873	PK, pyk; pyruvate kinase [EC:2.7.1.40]
comp16840_c0_seq1	K01768	E4.6.1.1; adenylate cyclase [EC:4.6.1.1]
comp14689_c0_seq1	K00873	PK, pyk; pyruvate kinase [EC:2.7.1.40]
comp18392_c0_seq3	K02320	POLA1; DNA polymerase alpha subunit A [EC:2.7.7.7]
comp25580_c0_seq1	K01427	URE; urease [EC:3.5.1.5]
comp19632_c1_seq1	K01522	FHIT; bis(5'-adenosyl)-triphosphatase [EC:3.6.1.29]
comp14240_c0_seq3	K00940	E2.7.4.6, ndk; nucleoside-diphosphate kinase [EC:2.7.4.6]
comp29906_c0_seq1	K00940	E2.7.4.6, ndk; nucleoside-diphosphate kinase [EC:2.7.4.6]
comp24882_c0_seq1	K03787	surE; 5'-nucleotidase [EC:3.1.3.5]
comp23601_c0_seq10	K02325	POLE2; DNA polymerase epsilon subunit 2 [EC:2.7.7.7]
comp19078_c0_seq2	K01488	E3.5.4.4, ADA, add; adenosine deaminase [EC:3.5.4.4]
comp142495_c0_seq1	K00939	E2.7.4.3, adk; adenylate kinase [EC:2.7.4.3]
comp25593_c0_seq2	K01945	purD; phosphoribosylamine--glycine ligase [EC:6.3.4.13]
comp15159_c0_seq1	K14641	APY1_2; apyrase [EC:3.6.1.5]
comp22017_c0_seq2	K00860	cysC; adenylylsulfate kinase [EC:2.7.1.25]
comp7014_c0_seq1	K03049	rpoE1; DNA-directed RNA polymerase subunit E' [EC:2.7.7.6]
comp30956_c0_seq1	K00939	E2.7.4.3, adk; adenylate kinase [EC:2.7.4.3]
comp7363_c0_seq1	K10808	RRM2; ribonucleoside-diphosphate reductase subunit M2 [EC:1.17.4.1]
comp23850_c0_seq1	K11808	ADE2; phosphoribosylaminoimidazole carboxylase [EC:4.1.1.21]
comp16323_c0_seq1	K02684	PRI1; DNA primase small subunit [EC:2.7.7.-]
comp23366_c0_seq1	K03006	RPB1, POLR2A; DNA-directed RNA polymerase II subunit RPB1 [EC:2.7.7.6]
comp16293_c0_seq1	K00939	E2.7.4.3, adk; adenylate kinase [EC:2.7.4.3]
comp25584_c0_seq15	K01835	pgm; phosphoglucomutase [EC:5.4.2.2]
comp14520_c0_seq1	K02999	RPA1, POLR1A; DNA-directed RNA polymerase I subunit RPA1 [EC:2.7.7.6]
comp22650_c1_seq1	K00962	pnp, PNPT1; polyribonucleotide nucleotidyltransferase [EC:2.7.7.8]
comp6046_c0_seq1	K00860	cysC; adenylylsulfate kinase [EC:2.7.1.25]
comp29719_c0_seq1	K03787	surE; 5'-nucleotidase [EC:3.1.3.5]
comp11692_c0_seq1	K01951	guaA, GMPS; GMP synthase (glutamine-hydrolysing) [EC:6.3.5.2]
comp7581_c0_seq1	K00760	hprT, hpt, HPRT1; hypoxanthine phosphoribosyltransferase [EC:2.4.2.8]
comp23596_c0_seq1	K10807	RRM1; ribonucleoside-diphosphate reductase subunit M1 [EC:1.17.4.1]
comp11293_c0_seq2	K01519	ITPA; inosine triphosphate pyrophosphatase [EC:3.6.1.19]
comp24161_c0_seq1	K03002	RPA2, POLR1B; DNA-directed RNA polymerase I subunit RPA2 [EC:2.7.7.6]
comp20464_c1_seq1	K00602	purH; phosphoribosylaminoimidazolecarboxamide formyltransferase / IMP cyclohydrolase [EC:2.1.2.3 3.5.4.10]
comp26345_c0_seq4	K01952	purL, PFAS; phosphoribosylformylglycinamidine synthase [EC:6.3.5.3]
comp24351_c0_seq1	K01490	E3.5.4.6, AMPD; AMP deaminase [EC:3.5.4.6]
comp26144_c0_seq12	K03018	RPC1, POLR3A; DNA-directed RNA polymerase III subunit RPC1 [EC:2.7.7.6]
comp25112_c0_seq4	K00759	E2.4.2.7, apt; adenine phosphoribosyltransferase [EC:2.4.2.7]
comp15269_c0_seq2	K01923	purC; phosphoribosylaminoimidazole-succinocarboxamide synthase [EC:6.3.2.6]
comp23414_c1_seq3	K13484	TTHL; 5-hydroxyisourate hydrolase / 2-oxo-4-hydroxy-4-carboxy-5-ureidoimidazoline decarboxylase [EC:3.5.2.17 4.1.1.-]
comp18632_c0_seq3	K00942	E2.7.4.8, gmk; guanylate kinase [EC:2.7.4.8]
comp25661_c0_seq1	K00106	XDH; xanthine dehydrogenase/oxidase [EC:1.17.1.4 1.17.3.2]
comp21514_c0_seq1	K01081	E3.1.3.5; 5'-nucleotidase [EC:3.1.3.5]
comp19193_c0_seq1	K00940	E2.7.4.6, ndk; nucleoside-diphosphate kinase [EC:2.7.4.6]
comp13117_c0_seq1	K01240	URH1; uridine nucleosidase [EC:3.2.2.3]
comp24175_c0_seq2	K02327	POLD1; DNA polymerase delta subunit 1 [EC:2.7.7.7]
comp28008_c0_seq1	K01520	dut, DUT; dUTP pyrophosphatase [EC:3.6.1.23]
comp22818_c1_seq2	K00940	E2.7.4.6, ndk; nucleoside-diphosphate kinase [EC:2.7.4.6]
comp24915_c0_seq11	K16329	psuG; pseudouridine-5'-phosphate glycosidase [EC:3.2.-.-]
comp13565_c0_seq2	K00761	upp, UPRT; uracil phosphoribosyltransferase [EC:2.4.2.9]
comp25397_c0_seq4	K01937	E6.3.4.2, pyrG; CTP synthase [EC:6.3.4.2]
comp21568_c0_seq2	K00943	E2.7.4.9, tmk; dTMP kinase [EC:2.7.4.9]
comp13478_c0_seq1	K01520	dut, DUT; dUTP pyrophosphatase [EC:3.6.1.23]
comp10420_c0_seq1	K13800	CMPK1, UMPK; UMP-CMP kinase [EC:2.7.4.- 2.7.4.14]
comp20499_c0_seq1	K03021	RPC2, POLR3B; DNA-directed RNA polymerase III subunit RPC2 [EC:2.7.7.6]
comp12009_c0_seq1	K01465	URA4, pyrC; dihydroorotase [EC:3.5.2.3]
comp14468_c0_seq1	K01955	carB, CPA2; carbamoyl-phosphate synthase large subunit [EC:6.3.5.5]
comp26993_c0_seq1	K13421	UMPS; uridine monophosphate synthetase [EC:2.4.2.10 4.1.1.23]
comp19418_c0_seq2	K02685	PRI2; DNA primase large subunit [EC:2.7.7.-]
comp14347_c0_seq3	K00876	udk, UCK; uridine kinase [EC:2.7.1.48]
comp25359_c0_seq1	K02335	DPO1, polA; DNA polymerase I [EC:2.7.7.7]
comp22879_c0_seq8	K00384	E1.8.1.9, trxB; thioredoxin reductase (NADPH) [EC:1.8.1.9]
comp29956_c0_seq1	K01510	ENTPD1_3_8; apyrase [EC:3.6.1.5]
comp18051_c0_seq1	K03046	rpoC; DNA-directed RNA polymerase subunit beta' [EC:2.7.7.6]
comp25786_c0_seq3	K02324	POLE1; DNA polymerase epsilon subunit 1 [EC:2.7.7.7]
comp25518_c0_seq4	K00609	pyrB, PYR2; aspartate carbamoyltransferase catalytic subunit [EC:2.1.3.2]
comp33528_c0_seq1	K00857	tdk, TK; thymidine kinase [EC:2.7.1.21]
comp26360_c1_seq1	K03010	RPB2, POLR2B; DNA-directed RNA polymerase II subunit RPB2 [EC:2.7.7.6]
comp15857_c0_seq1	K13998	DHFR-TS; dihydrofolate reductase / thymidylate synthase [EC:1.5.1.3 2.1.1.45]
comp18392_c0_seq3	K02320	POLA1; DNA polymerase alpha subunit A [EC:2.7.7.7]
comp14240_c0_seq3	K00940	E2.7.4.6, ndk; nucleoside-diphosphate kinase [EC:2.7.4.6]
comp19470_c0_seq2	K09903	pyrH; uridylate kinase [EC:2.7.4.22]
comp29906_c0_seq1	K00940	E2.7.4.6, ndk; nucleoside-diphosphate kinase [EC:2.7.4.6]
comp24882_c0_seq1	K03787	surE; 5'-nucleotidase [EC:3.1.3.5]
comp23601_c0_seq10	K02325	POLE2; DNA polymerase epsilon subunit 2 [EC:2.7.7.7]
comp15839_c0_seq2	K01937	E6.3.4.2, pyrG; CTP synthase [EC:6.3.4.2]
comp15159_c0_seq1	K14641	APY1_2; apyrase [EC:3.6.1.5]
comp7014_c0_seq1	K03049	rpoE1; DNA-directed RNA polymerase subunit E' [EC:2.7.7.6]
comp21204_c0_seq1	K00207	DPYD; dihydropyrimidine dehydrogenase (NADP+) [EC:1.3.1.2]
comp7363_c0_seq1	K10808	RRM2; ribonucleoside-diphosphate reductase subunit M2 [EC:1.17.4.1]
comp25116_c0_seq5	K13800	CMPK1, UMPK; UMP-CMP kinase [EC:2.7.4.- 2.7.4.14]
comp16323_c0_seq1	K02684	PRI1; DNA primase small subunit [EC:2.7.7.-]
comp23366_c0_seq1	K03006	RPB1, POLR2A; DNA-directed RNA polymerase II subunit RPB1 [EC:2.7.7.6]
comp35438_c0_seq1	K01431	UPB1; beta-ureidopropionase [EC:3.5.1.6]
comp19799_c0_seq1	K00254	DHODH, pyrD; dihydroorotate dehydrogenase [EC:1.3.5.2]
comp14520_c0_seq1	K02999	RPA1, POLR1A; DNA-directed RNA polymerase I subunit RPA1 [EC:2.7.7.6]
comp22650_c1_seq1	K00962	pnp, PNPT1; polyribonucleotide nucleotidyltransferase [EC:2.7.7.8]
comp29719_c0_seq1	K03787	surE; 5'-nucleotidase [EC:3.1.3.5]
comp18776_c1_seq1	K00761	upp, UPRT; uracil phosphoribosyltransferase [EC:2.4.2.9]
comp23596_c0_seq1	K10807	RRM1; ribonucleoside-diphosphate reductase subunit M1 [EC:1.17.4.1]
comp23486_c0_seq3	K01464	DPYS, dht, hydA; dihydropyrimidinase [EC:3.5.2.2]
comp11293_c0_seq2	K01519	ITPA; inosine triphosphate pyrophosphatase [EC:3.6.1.19]
comp8401_c0_seq1	K16904	DCTPP1; dCTP diphosphatase [EC:3.6.1.12]
comp24161_c0_seq1	K03002	RPA2, POLR1B; DNA-directed RNA polymerase I subunit RPA2 [EC:2.7.7.6]
comp19017_c0_seq1	K00384	E1.8.1.9, trxB; thioredoxin reductase (NADPH) [EC:1.8.1.9]
comp25678_c0_seq1	K00384	E1.8.1.9, trxB; thioredoxin reductase (NADPH) [EC:1.8.1.9]
comp26144_c0_seq12	K03018	RPC1, POLR3A; DNA-directed RNA polymerase III subunit RPC1 [EC:2.7.7.6]
comp31968_c0_seq1	K01489	cdd, CDA; cytidine deaminase [EC:3.5.4.5]
comp19265_c0_seq4	K01493	comEB; dCMP deaminase [EC:3.5.4.12]
comp12010_c0_seq1	K01939	E6.3.4.4, purA; adenylosuccinate synthase [EC:6.3.4.4]
comp11794_c0_seq1	K01915	glnA; glutamine synthetase [EC:6.3.1.2]
comp19250_c0_seq1	K00820	E2.6.1.16, glmS; glucosamine--fructose-6-phosphate aminotransferase (isomerizing) [EC:2.6.1.16]
comp24357_c0_seq1	K01580	E4.1.1.15, gadB, gadA, GAD; glutamate decarboxylase [EC:4.1.1.15]
comp25229_c0_seq4	K00264	GLT1; glutamate synthase (NADPH/NADH) [EC:1.4.1.13 1.4.1.14]
comp24072_c0_seq1	K00827	AGXT2; alanine-glyoxylate transaminase / (R)-3-amino-2-methylpropionate-pyruvate transaminase [EC:2.6.1.44 2.6.1.40]
comp20540_c0_seq1	K00294	E1.2.1.88; 1-pyrroline-5-carboxylate dehydrogenase [EC:1.2.1.88]
comp11390_c0_seq1	K01940	E6.3.4.5, argG; argininosuccinate synthase [EC:6.3.4.5]
comp25527_c0_seq4	K00262	E1.4.1.4, gdhA; glutamate dehydrogenase (NADP+) [EC:1.4.1.4]
comp30339_c0_seq1	K01580	E4.1.1.15, gadB, gadA, GAD; glutamate decarboxylase [EC:4.1.1.15]
comp14468_c0_seq1	K01955	carB, CPA2; carbamoyl-phosphate synthase large subunit [EC:6.3.5.5]
comp7247_c0_seq1	K01580	E4.1.1.15, gadB, gadA, GAD; glutamate decarboxylase [EC:4.1.1.15]
comp20514_c0_seq1	K14454	GOT1; aspartate aminotransferase, cytoplasmic [EC:2.6.1.1]
comp10566_c0_seq1	K01953	asnB, ASNS; asparagine synthase (glutamine-hydrolysing) [EC:6.3.5.4]
comp25518_c0_seq4	K00609	pyrB, PYR2; aspartate carbamoyltransferase catalytic subunit [EC:2.1.3.2]
comp15510_c0_seq2	K14272	GGAT; glutamate--glyoxylate aminotransferase [EC:2.6.1.4 2.6.1.2 2.6.1.44 2.6.1.-]
comp22388_c0_seq1	K14455	GOT2; aspartate aminotransferase, mitochondrial [EC:2.6.1.1]
comp15547_c0_seq1	K13566	NIT2; omega-amidase [EC:3.5.1.3]
comp19271_c0_seq1	K00261	GLUD1_2, gdhA; glutamate dehydrogenase (NAD(P)+) [EC:1.4.1.3]
comp7837_c0_seq1	K16871	POP2; 4-aminobutyrate---pyruvate transaminase [EC:2.6.1.96]
comp28965_c0_seq1	K00814	GPT, ALT; alanine transaminase [EC:2.6.1.2]
comp20215_c0_seq1	K14454	GOT1; aspartate aminotransferase, cytoplasmic [EC:2.6.1.1]
comp14025_c0_seq2	K00811	ASP5; aspartate aminotransferase, chloroplastic [EC:2.6.1.1]
comp29095_c0_seq1	K01755	argH, ASL; argininosuccinate lyase [EC:4.3.2.1]
comp22955_c1_seq1	K00813	aspC; aspartate aminotransferase [EC:2.6.1.1]
comp16234_c0_seq2	K00278	nadB; L-aspartate oxidase [EC:1.4.3.16]
comp24838_c0_seq1	K01962	accA; acetyl-CoA carboxylase carboxyl transferase subunit alpha [EC:6.4.1.2]
comp16617_c0_seq5	K01962	accA; acetyl-CoA carboxylase carboxyl transferase subunit alpha [EC:6.4.1.2]
comp13970_c0_seq1	K01961	accC; acetyl-CoA carboxylase, biotin carboxylase subunit [EC:6.4.1.2 6.3.4.14]
comp24919_c5_seq13	K11262	ACAC; acetyl-CoA carboxylase / biotin carboxylase [EC:6.4.1.2 6.3.4.14]
comp23033_c0_seq1	K00928	lysC; aspartate kinase [EC:2.7.2.4]
comp7589_c0_seq1	K00600	glyA, SHMT; glycine hydroxymethyltransferase [EC:2.1.2.1]
comp24920_c0_seq1	K00133	asd; aspartate-semialdehyde dehydrogenase [EC:1.2.1.11]
comp18343_c0_seq1	K01696	trpB; tryptophan synthase beta chain [EC:4.2.1.20]
comp19092_c0_seq1	K01754	E4.3.1.19, ilvA, tdcB; threonine dehydratase [EC:4.3.1.19]
comp13362_c0_seq1	K00872	thrB1; homoserine kinase [EC:2.7.1.39]
comp25512_c1_seq9	K14085	ALDH7A1; aldehyde dehydrogenase family 7 member A1 [EC:1.2.1.31 1.2.1.8 1.2.1.3]
comp23922_c0_seq5	K01754	E4.3.1.19, ilvA, tdcB; threonine dehydratase [EC:4.3.1.19]
comp14509_c1_seq2	K00600	glyA, SHMT; glycine hydroxymethyltransferase [EC:2.1.2.1]
comp16430_c0_seq1	K01695	trpA; tryptophan synthase alpha chain [EC:4.2.1.20]
comp24072_c0_seq1	K00827	AGXT2; alanine-glyoxylate transaminase / (R)-3-amino-2-methylpropionate-pyruvate transaminase [EC:2.6.1.44 2.6.1.40]
comp26324_c1_seq20	K00600	glyA, SHMT; glycine hydroxymethyltransferase [EC:2.1.2.1]
comp12822_c0_seq1	K15634	gpmB; probable phosphoglycerate mutase [EC:5.4.2.12]
comp16564_c0_seq1	K00831	serC, PSAT1; phosphoserine aminotransferase [EC:2.6.1.52]
comp7075_c0_seq1	K00058	serA, PHGDH; D-3-phosphoglycerate dehydrogenase [EC:1.1.1.95]
comp6806_c0_seq1	K01834	PGAM, gpmA; 2,3-bisphosphoglycerate-dependent phosphoglycerate mutase [EC:5.4.2.11]
comp30139_c0_seq1	K00600	glyA, SHMT; glycine hydroxymethyltransferase [EC:2.1.2.1]
comp7371_c0_seq1	K00130	betB, gbsA; betaine-aldehyde dehydrogenase [EC:1.2.1.8]
comp24608_c0_seq1	K00281	GLDC, gcvP; glycine dehydrogenase [EC:1.4.4.2]
comp25064_c0_seq3	K15918	GLYK; D-glycerate 3-kinase [EC:2.7.1.31]
comp14102_c0_seq1	K12524	thrA; bifunctional aspartokinase / homoserine dehydrogenase 1 [EC:2.7.2.4 1.1.1.3]
comp16301_c0_seq2	K15634	gpmB; probable phosphoglycerate mutase [EC:5.4.2.12]
comp22778_c0_seq1	K01620	ltaE; threonine aldolase [EC:4.1.2.5]
comp31805_c0_seq1	K00058	serA, PHGDH; D-3-phosphoglycerate dehydrogenase [EC:1.1.1.95]
comp24292_c0_seq1	K15633	gpmI; 2,3-bisphosphoglycerate-independent phosphoglycerate mutase [EC:5.4.2.12]
comp21460_c0_seq6	K15634	gpmB; probable phosphoglycerate mutase [EC:5.4.2.12]
comp15510_c0_seq2	K14272	GGAT; glutamate--glyoxylate aminotransferase [EC:2.6.1.4 2.6.1.2 2.6.1.44 2.6.1.-]
comp14714_c0_seq1	K00276	AOC3, AOC2, tynA; primary-amine oxidase [EC:1.4.3.21]
comp14563_c0_seq2	K15634	gpmB; probable phosphoglycerate mutase [EC:5.4.2.12]
comp8024_c0_seq2	K00058	serA, PHGDH; D-3-phosphoglycerate dehydrogenase [EC:1.1.1.95]
comp15960_c0_seq1	K00382	DLD, lpd, pdhD; dihydrolipoamide dehydrogenase [EC:1.8.1.4]
comp21502_c0_seq1	K12235	SRR; serine racemase [EC:5.1.1.18]
comp18791_c0_seq1	K01733	thrC; threonine synthase [EC:4.2.3.1]
comp15360_c0_seq1	K06001	K06001, trpB; tryptophan synthase beta chain [EC:4.2.1.20]
comp20076_c0_seq1	K01834	PGAM, gpmA; 2,3-bisphosphoglycerate-dependent phosphoglycerate mutase [EC:5.4.2.11]
comp7555_c0_seq1	K00605	gcvT, AMT; aminomethyltransferase [EC:2.1.2.10]
comp25014_c0_seq1	K00382	DLD, lpd, pdhD; dihydrolipoamide dehydrogenase [EC:1.8.1.4]
comp25271_c1_seq1	K01079	serB, PSPH; phosphoserine phosphatase [EC:3.1.3.3]
comp25405_c1_seq1	K00600	glyA, SHMT; glycine hydroxymethyltransferase [EC:2.1.2.1]
comp17008_c0_seq1	K00815	TAT; tyrosine aminotransferase [EC:2.6.1.5]
comp18408_c0_seq1	K00815	TAT; tyrosine aminotransferase [EC:2.6.1.5]
comp23033_c0_seq1	K00928	lysC; aspartate kinase [EC:2.7.2.4]
comp19427_c0_seq1	K01739	metB; cystathionine gamma-synthase [EC:2.5.1.48]
comp24920_c0_seq1	K00133	asd; aspartate-semialdehyde dehydrogenase [EC:1.2.1.11]
comp10438_c0_seq1	K01762	ACS; 1-aminocyclopropane-1-carboxylate synthase [EC:4.4.1.14]
comp7230_c0_seq1	K01611	speD, AMD1; S-adenosylmethionine decarboxylase [EC:4.1.1.50]
comp24214_c1_seq2	K00797	speE, SRM; spermidine synthase [EC:2.5.1.16]
comp31612_c0_seq1	K13034	ATCYSC1; L-3-cyanoalanine synthase/ cysteine synthase [EC:2.5.1.47 4.4.1.9]
comp6033_c0_seq1	K00640	cysE; serine O-acetyltransferase [EC:2.3.1.30]
comp29497_c0_seq1	K00797	speE, SRM; spermidine synthase [EC:2.5.1.16]
comp15433_c0_seq1	K05933	E1.14.17.4; aminocyclopropanecarboxylate oxidase [EC:1.14.17.4]
comp29531_c0_seq1	K01738	cysK; cysteine synthase A [EC:2.5.1.47]
comp7138_c0_seq1	K01011	TST, MPST, sseA; thiosulfate/3-mercaptopyruvate sulfurtransferase [EC:2.8.1.1 2.8.1.2]
comp7335_c0_seq2	K00016	LDH, ldh; L-lactate dehydrogenase [EC:1.1.1.27]
comp24123_c0_seq1	K01738	cysK; cysteine synthase A [EC:2.5.1.47]
comp20876_c0_seq1	K01251	E3.3.1.1, ahcY; adenosylhomocysteinase [EC:3.3.1.1]
comp18234_c0_seq2	K01738	cysK; cysteine synthase A [EC:2.5.1.47]
comp23103_c0_seq1	K08963	mtnA; methylthioribose-1-phosphate isomerase [EC:5.3.1.23]
comp14102_c0_seq1	K12524	thrA; bifunctional aspartokinase / homoserine dehydrogenase 1 [EC:2.7.2.4 1.1.1.3]
comp7517_c0_seq1	K00640	cysE; serine O-acetyltransferase [EC:2.3.1.30]
comp17318_c0_seq1	K00815	TAT; tyrosine aminotransferase [EC:2.6.1.5]
comp24700_c1_seq6	K01760	metC; cystathionine beta-lyase [EC:4.4.1.8]
comp17079_c0_seq1	K08967	mtnD, mtnZ, ADI1; 1,2-dihydroxy-3-keto-5-methylthiopentene dioxygenase [EC:1.13.11.53 1.13.11.54]
comp15786_c0_seq1	K00789	metK; S-adenosylmethionine synthetase [EC:2.5.1.6]
comp20514_c0_seq1	K14454	GOT1; aspartate aminotransferase, cytoplasmic [EC:2.6.1.1]
comp19949_c0_seq1	K00640	cysE; serine O-acetyltransferase [EC:2.3.1.30]
comp25166_c0_seq1	K00558	DNMT1, dcm; DNA (cytosine-5)-methyltransferase 1 [EC:2.1.1.37]
comp15127_c0_seq1	K01611	speD, AMD1; S-adenosylmethionine decarboxylase [EC:4.1.1.50]
comp7186_c0_seq1	K01738	cysK; cysteine synthase A [EC:2.5.1.47]
comp23044_c0_seq2	K00558	DNMT1, dcm; DNA (cytosine-5)-methyltransferase 1 [EC:2.1.1.37]
comp22388_c0_seq1	K14455	GOT2; aspartate aminotransferase, mitochondrial [EC:2.6.1.1]
comp20992_c0_seq1	K16054	DEP1; methylthioribulose 1-phosphate dehydratase / enolase-phosphatase E1 [EC:4.2.1.109 3.1.3.77]
comp26050_c2_seq1	K00558	DNMT1, dcm; DNA (cytosine-5)-methyltransferase 1 [EC:2.1.1.37]
comp35789_c0_seq1	K17398	DNMT3A; DNA (cytosine-5)-methyltransferase 3A [EC:2.1.1.37]
comp28038_c0_seq1	K00797	speE, SRM; spermidine synthase [EC:2.5.1.16]
comp43313_c0_seq1	K01611	speD, AMD1; S-adenosylmethionine decarboxylase [EC:4.1.1.50]
comp21613_c0_seq1	K01244	MTN; 5'-methylthioadenosine nucleosidase [EC:3.2.2.16]
comp25785_c1_seq2	K00899	mtnK; 5-methylthioribose kinase [EC:2.7.1.100]
comp20215_c0_seq1	K14454	GOT1; aspartate aminotransferase, cytoplasmic [EC:2.6.1.1]
comp32688_c0_seq1	K00547	mmuM; homocysteine S-methyltransferase [EC:2.1.1.10]
comp14025_c0_seq2	K00811	ASP5; aspartate aminotransferase, chloroplastic [EC:2.6.1.1]
comp21495_c0_seq1	K00789	metK; S-adenosylmethionine synthetase [EC:2.5.1.6]
comp19392_c0_seq1	K00549	metE; 5-methyltetrahydropteroyltriglutamate--homocysteine methyltransferase [EC:2.1.1.14]
comp26718_c0_seq1	K00789	metK; S-adenosylmethionine synthetase [EC:2.5.1.6]
comp22955_c1_seq1	K00813	aspC; aspartate aminotransferase [EC:2.6.1.1]
comp7631_c0_seq1	K01761	E4.4.1.11; methionine-gamma-lyase [EC:4.4.1.11]
comp44043_c0_seq1	K05933	E1.14.17.4; aminocyclopropanecarboxylate oxidase [EC:1.14.17.4]
comp20332_c0_seq1	K00547	mmuM; homocysteine S-methyltransferase [EC:2.1.1.10]
comp27458_c0_seq1	K08967	mtnD, mtnZ, ADI1; 1,2-dihydroxy-3-keto-5-methylthiopentene dioxygenase [EC:1.13.11.53 1.13.11.54]
comp12034_c0_seq1	K00626	E2.3.1.9, atoB; acetyl-CoA C-acetyltransferase [EC:2.3.1.9]
comp16044_c0_seq1	K00826	E2.6.1.42, ilvE; branched-chain amino acid aminotransferase [EC:2.6.1.42]
comp18302_c0_seq1	K00128	E1.2.1.3; aldehyde dehydrogenase (NAD+) [EC:1.2.1.3]
comp7135_c0_seq1	K05605	HIBCH; 3-hydroxyisobutyryl-CoA hydrolase [EC:3.1.2.4]
comp7676_c0_seq1	K00826	E2.6.1.42, ilvE; branched-chain amino acid aminotransferase [EC:2.6.1.42]
comp20757_c0_seq1	K00166	BCKDHA, bkdA1; 2-oxoisovalerate dehydrogenase E1 component, alpha subunit [EC:1.2.4.4]
comp19498_c0_seq4	K00020	E1.1.1.31, mmsB; 3-hydroxyisobutyrate dehydrogenase [EC:1.1.1.31]
comp21253_c0_seq2	K00826	E2.6.1.42, ilvE; branched-chain amino acid aminotransferase [EC:2.6.1.42]
comp25512_c1_seq9	K14085	ALDH7A1; aldehyde dehydrogenase family 7 member A1 [EC:1.2.1.31 1.2.1.8 1.2.1.3]
comp22191_c0_seq7	K00140	mmsA, iolA, ALDH6A1; malonate-semialdehyde dehydrogenase (acetylating) / methylmalonate-semialdehyde dehydrogenase [EC:1.2.1.18 1.2.1.27]
comp22857_c0_seq3	K00253	IVD, ivd; isovaleryl-CoA dehydrogenase [EC:1.3.8.4]
comp27099_c0_seq1	K00128	E1.2.1.3; aldehyde dehydrogenase (NAD+) [EC:1.2.1.3]
comp22162_c0_seq2	K01640	E4.1.3.4, HMGCL, hmgL; hydroxymethylglutaryl-CoA lyase [EC:4.1.3.4]
comp20874_c0_seq1	K00826	E2.6.1.42, ilvE; branched-chain amino acid aminotransferase [EC:2.6.1.42]
comp23956_c0_seq4	K05605	HIBCH; 3-hydroxyisobutyryl-CoA hydrolase [EC:3.1.2.4]
comp16100_c0_seq1	K07513	ACAA1; acetyl-CoA acyltransferase 1 [EC:2.3.1.16]
comp11459_c0_seq1	K09699	E2.3.1.168, bkdB; 2-oxoisovalerate dehydrogenase E2 component (dihydrolipoyl transacylase) [EC:2.3.1.168]
comp16901_c0_seq1	K00128	E1.2.1.3; aldehyde dehydrogenase (NAD+) [EC:1.2.1.3]
comp21559_c0_seq1	K05605	HIBCH; 3-hydroxyisobutyryl-CoA hydrolase [EC:3.1.2.4]
comp24999_c0_seq1	K00249	ACADM, acd; acyl-CoA dehydrogenase [EC:1.3.8.7]
comp24731_c0_seq3	K01641	E2.3.3.10; hydroxymethylglutaryl-CoA synthase [EC:2.3.3.10]
comp20445_c0_seq2	K00167	E1.2.4.4B, bkdA2; 2-oxoisovalerate dehydrogenase E1 component, beta subunit [EC:1.2.4.4]
comp25643_c0_seq2	K01969	E6.4.1.4B; 3-methylcrotonyl-CoA carboxylase beta subunit [EC:6.4.1.4]
comp15960_c0_seq1	K00382	DLD, lpd, pdhD; dihydrolipoamide dehydrogenase [EC:1.8.1.4]
comp15877_c0_seq1	K05607	AUH; methylglutaconyl-CoA hydratase [EC:4.2.1.18]
comp25922_c0_seq6	K01968	E6.4.1.4A; 3-methylcrotonyl-CoA carboxylase alpha subunit [EC:6.4.1.4]
comp25014_c0_seq1	K00382	DLD, lpd, pdhD; dihydrolipoamide dehydrogenase [EC:1.8.1.4]
comp76210_c0_seq1	K00128	E1.2.1.3; aldehyde dehydrogenase (NAD+) [EC:1.2.1.3]
comp22162_c0_seq2	K01640	E4.1.3.4, HMGCL, hmgL; hydroxymethylglutaryl-CoA lyase [EC:4.1.3.4]
comp16044_c0_seq1	K00826	E2.6.1.42, ilvE; branched-chain amino acid aminotransferase [EC:2.6.1.42]
comp7676_c0_seq1	K00826	E2.6.1.42, ilvE; branched-chain amino acid aminotransferase [EC:2.6.1.42]
comp19092_c0_seq1	K01754	E4.3.1.19, ilvA, tdcB; threonine dehydratase [EC:4.3.1.19]
comp11984_c0_seq1	K00053	ilvC; ketol-acid reductoisomerase [EC:1.1.1.86]
comp21253_c0_seq2	K00826	E2.6.1.42, ilvE; branched-chain amino acid aminotransferase [EC:2.6.1.42]
comp23922_c0_seq5	K01754	E4.3.1.19, ilvA, tdcB; threonine dehydratase [EC:4.3.1.19]
comp30649_c0_seq1	K00052	leuB; 3-isopropylmalate dehydrogenase [EC:1.1.1.85]
comp7272_c0_seq1	K01704	leuD; 3-isopropylmalate/(R)-2-methylmalate dehydratase small subunit [EC:4.2.1.33 4.2.1.35]
comp26159_c1_seq2	K01649	leuA; 2-isopropylmalate synthase [EC:2.3.3.13]
comp20874_c0_seq1	K00826	E2.6.1.42, ilvE; branched-chain amino acid aminotransferase [EC:2.6.1.42]
comp26140_c0_seq1	K00053	ilvC; ketol-acid reductoisomerase [EC:1.1.1.86]
comp22898_c0_seq1	K01687	ilvD; dihydroxy-acid dehydratase [EC:4.2.1.9]
comp13594_c0_seq1	K01703	leuC; 3-isopropylmalate/(R)-2-methylmalate dehydratase large subunit [EC:4.2.1.33 4.2.1.35]
comp18728_c0_seq4	K01653	E2.2.1.6S, ilvH, ilvN; acetolactate synthase I/III small subunit [EC:2.2.1.6]
comp22083_c0_seq2	K01653	E2.2.1.6S, ilvH, ilvN; acetolactate synthase I/III small subunit [EC:2.2.1.6]
comp23033_c0_seq1	K00928	lysC; aspartate kinase [EC:2.7.2.4]
comp16169_c0_seq1	K01586	lysA; diaminopimelate decarboxylase [EC:4.1.1.20]
comp24920_c0_seq1	K00133	asd; aspartate-semialdehyde dehydrogenase [EC:1.2.1.11]
comp25512_c1_seq9	K14085	ALDH7A1; aldehyde dehydrogenase family 7 member A1 [EC:1.2.1.31 1.2.1.8 1.2.1.3]
comp25853_c1_seq10	K10206	E2.6.1.83; LL-diaminopimelate aminotransferase [EC:2.6.1.83]
comp23385_c0_seq2	K00215	dapB; 4-hydroxy-tetrahydrodipicolinate reductase [EC:1.17.1.8]
comp18730_c0_seq2	K10206	E2.6.1.83; LL-diaminopimelate aminotransferase [EC:2.6.1.83]
comp26009_c0_seq1	K01714	dapA; 4-hydroxy-tetrahydrodipicolinate synthase [EC:4.3.3.7]
comp23043_c0_seq1	K01778	dapF; diaminopimelate epimerase [EC:5.1.1.7]
comp14102_c0_seq1	K12524	thrA; bifunctional aspartokinase / homoserine dehydrogenase 1 [EC:2.7.2.4 1.1.1.3]
comp23104_c0_seq2	K01929	murF; UDP-N-acetylmuramoyl-tripeptide--D-alanyl-D-alanine ligase [EC:6.3.2.10]
comp12034_c0_seq1	K00626	E2.3.1.9, atoB; acetyl-CoA C-acetyltransferase [EC:2.3.1.9]
comp18302_c0_seq1	K00128	E1.2.1.3; aldehyde dehydrogenase (NAD+) [EC:1.2.1.3]
comp25512_c1_seq9	K14085	ALDH7A1; aldehyde dehydrogenase family 7 member A1 [EC:1.2.1.31 1.2.1.8 1.2.1.3]
comp27099_c0_seq1	K00128	E1.2.1.3; aldehyde dehydrogenase (NAD+) [EC:1.2.1.3]
comp13531_c0_seq1	K11420	EHMT; euchromatic histone-lysine N-methyltransferase [EC:2.1.1.43]
comp16901_c0_seq1	K00128	E1.2.1.3; aldehyde dehydrogenase (NAD+) [EC:1.2.1.3]
comp25695_c0_seq2	K11420	EHMT; euchromatic histone-lysine N-methyltransferase [EC:2.1.1.43]
comp21372_c0_seq5	K01582	E4.1.1.18, ldcC, cadA; lysine decarboxylase [EC:4.1.1.18]
comp19173_c0_seq1	K11420	EHMT; euchromatic histone-lysine N-methyltransferase [EC:2.1.1.43]
comp8311_c0_seq1	K00658	DLST, sucB; 2-oxoglutarate dehydrogenase E2 component (dihydrolipoamide succinyltransferase) [EC:2.3.1.61]
comp22836_c0_seq2	K11420	EHMT; euchromatic histone-lysine N-methyltransferase [EC:2.1.1.43]
comp22271_c0_seq3	K11422	SETD1, SET1; histone-lysine N-methyltransferase SETD1 [EC:2.1.1.43]
comp24875_c2_seq1	K00164	OGDH, sucA; 2-oxoglutarate dehydrogenase E1 component [EC:1.2.4.2]
comp24092_c0_seq1	K09186	MLL1; histone-lysine N-methyltransferase MLL1 [EC:2.1.1.43]
comp76210_c0_seq1	K00128	E1.2.1.3; aldehyde dehydrogenase (NAD+) [EC:1.2.1.3]
comp18302_c0_seq1	K00128	E1.2.1.3; aldehyde dehydrogenase (NAD+) [EC:1.2.1.3]
comp31232_c0_seq1	K00819	E2.6.1.13, rocD; ornithine--oxo-acid transaminase [EC:2.6.1.13]
comp33541_c0_seq1	K00931	proB; glutamate 5-kinase [EC:2.7.2.11]
comp8090_c0_seq1	K00318	E1.5.99.8; proline dehydrogenase [EC:1.5.99.8]
comp18028_c0_seq3	K00472	E1.14.11.2; prolyl 4-hydroxylase [EC:1.14.11.2]
comp20437_c1_seq1	K00930	argB; acetylglutamate kinase [EC:2.7.2.8]
comp16137_c0_seq2	K00472	E1.14.11.2; prolyl 4-hydroxylase [EC:1.14.11.2]
comp11794_c0_seq1	K01915	glnA; glutamine synthetase [EC:6.3.1.2]
comp7230_c0_seq1	K01611	speD, AMD1; S-adenosylmethionine decarboxylase [EC:4.1.1.50]
comp25512_c1_seq9	K14085	ALDH7A1; aldehyde dehydrogenase family 7 member A1 [EC:1.2.1.31 1.2.1.8 1.2.1.3]
comp24214_c1_seq2	K00797	speE, SRM; spermidine synthase [EC:2.5.1.16]
comp7091_c0_seq1	K10536	E3.5.3.12; agmatine deiminase [EC:3.5.3.12]
comp33232_c0_seq1	K00472	E1.14.11.2; prolyl 4-hydroxylase [EC:1.14.11.2]
comp29497_c0_seq1	K00797	speE, SRM; spermidine synthase [EC:2.5.1.16]
comp27099_c0_seq1	K00128	E1.2.1.3; aldehyde dehydrogenase (NAD+) [EC:1.2.1.3]
comp20540_c0_seq1	K00294	E1.2.1.88; 1-pyrroline-5-carboxylate dehydrogenase [EC:1.2.1.88]
comp34508_c0_seq1	K12657	ALDH18A1, P5CS; delta-1-pyrroline-5-carboxylate synthetase [EC:2.7.2.11 1.2.1.41]
comp22511_c0_seq2	K14677	ACY1; aminoacylase [EC:3.5.1.14]
comp25228_c0_seq2	K00472	E1.14.11.2; prolyl 4-hydroxylase [EC:1.14.11.2]
comp11390_c0_seq1	K01940	E6.3.4.5, argG; argininosuccinate synthase [EC:6.3.4.5]
comp25527_c0_seq4	K00262	E1.4.1.4, gdhA; glutamate dehydrogenase (NADP+) [EC:1.4.1.4]
comp24635_c0_seq2	K14682	argAB; amino-acid N-acetyltransferase [EC:2.3.1.1]
comp20514_c0_seq1	K14454	GOT1; aspartate aminotransferase, cytoplasmic [EC:2.6.1.1]
comp16901_c0_seq1	K00128	E1.2.1.3; aldehyde dehydrogenase (NAD+) [EC:1.2.1.3]
comp15127_c0_seq1	K01611	speD, AMD1; S-adenosylmethionine decarboxylase [EC:4.1.1.50]
comp22388_c0_seq1	K14455	GOT2; aspartate aminotransferase, mitochondrial [EC:2.6.1.1]
comp16283_c0_seq1	K01476	E3.5.3.1, rocF, arg; arginase [EC:3.5.3.1]
comp28038_c0_seq1	K00797	speE, SRM; spermidine synthase [EC:2.5.1.16]
comp43313_c0_seq1	K01611	speD, AMD1; S-adenosylmethionine decarboxylase [EC:4.1.1.50]
comp25580_c0_seq1	K01427	URE; urease [EC:3.5.1.5]
comp23989_c0_seq1	K01583	E4.1.1.19; arginine decarboxylase [EC:4.1.1.19]
comp19271_c0_seq1	K00261	GLUD1_2, gdhA; glutamate dehydrogenase (NAD(P)+) [EC:1.4.1.3]
comp21099_c0_seq2	K00472	E1.14.11.2; prolyl 4-hydroxylase [EC:1.14.11.2]
comp18236_c0_seq1	K00620	argJ; glutamate N-acetyltransferase / amino-acid N-acetyltransferase [EC:2.3.1.35 2.3.1.1]
comp20215_c0_seq1	K14454	GOT1; aspartate aminotransferase, cytoplasmic [EC:2.6.1.1]
comp30740_c0_seq1	K00611	OTC, argF, argI; ornithine carbamoyltransferase [EC:2.1.3.3]
comp24513_c0_seq6	K01259	pip; proline iminopeptidase [EC:3.4.11.5]
comp22739_c0_seq1	K14677	ACY1; aminoacylase [EC:3.5.1.14]
comp14025_c0_seq2	K00811	ASP5; aspartate aminotransferase, chloroplastic [EC:2.6.1.1]
comp25815_c1_seq1	K00818	E2.6.1.11, argD; acetylornithine aminotransferase [EC:2.6.1.11]
comp14565_c0_seq1	K00145	argC; N-acetyl-gamma-glutamyl-phosphate reductase [EC:1.2.1.38]
comp28207_c0_seq1	K01438	argE; acetylornithine deacetylase [EC:3.5.1.16]
comp29095_c0_seq1	K01755	argH, ASL; argininosuccinate lyase [EC:4.3.2.1]
comp22955_c1_seq1	K00813	aspC; aspartate aminotransferase [EC:2.6.1.1]
comp24605_c0_seq19	K13427	NOA1; nitric-oxide synthase, plant [EC:1.14.13.39]
comp76210_c0_seq1	K00128	E1.2.1.3; aldehyde dehydrogenase (NAD+) [EC:1.2.1.3]
comp18302_c0_seq1	K00128	E1.2.1.3; aldehyde dehydrogenase (NAD+) [EC:1.2.1.3]
comp24400_c0_seq1	K00599	E2.1.1.-; [EC:2.1.1.-]
comp17432_c0_seq1	K01745	hutH, HAL; histidine ammonia-lyase [EC:4.3.1.3]
comp25512_c1_seq9	K14085	ALDH7A1; aldehyde dehydrogenase family 7 member A1 [EC:1.2.1.31 1.2.1.8 1.2.1.3]
comp8216_c0_seq1	K00765	hisG; ATP phosphoribosyltransferase [EC:2.4.2.17]
comp27099_c0_seq1	K00128	E1.2.1.3; aldehyde dehydrogenase (NAD+) [EC:1.2.1.3]
comp52584_c0_seq1	K01593	DDC; aromatic-L-amino-acid decarboxylase [EC:4.1.1.28]
comp25804_c1_seq1	K11755	hisIE; phosphoribosyl-ATP pyrophosphohydrolase / phosphoribosyl-AMP cyclohydrolase [EC:3.6.1.31 3.5.4.19]
comp17908_c0_seq1	K00599	E2.1.1.-; [EC:2.1.1.-]
comp16901_c0_seq1	K00128	E1.2.1.3; aldehyde dehydrogenase (NAD+) [EC:1.2.1.3]
comp18031_c0_seq4	K01693	E4.2.1.19, hisB; imidazoleglycerol-phosphate dehydratase [EC:4.2.1.19]
comp23795_c0_seq2	K00013	hisD; histidinol dehydrogenase [EC:1.1.1.23]
comp19178_c1_seq7	K00817	hisC; histidinol-phosphate aminotransferase [EC:2.6.1.9]
comp24375_c0_seq18	K00599	E2.1.1.-; [EC:2.1.1.-]
comp11728_c0_seq2	K01590	hdc, HDC; histidine decarboxylase [EC:4.1.1.22]
comp7529_c0_seq1	K01663	HIS7; glutamine amidotransferase / cyclase [EC:2.4.2.- 4.1.3.-]
comp76210_c0_seq1	K00128	E1.2.1.3; aldehyde dehydrogenase (NAD+) [EC:1.2.1.3]
comp17008_c0_seq1	K00815	TAT; tyrosine aminotransferase [EC:2.6.1.5]
comp18408_c0_seq1	K00815	TAT; tyrosine aminotransferase [EC:2.6.1.5]
comp24400_c0_seq1	K00599	E2.1.1.-; [EC:2.1.1.-]
comp16013_c0_seq1	K00121	frmA, ADH5, adhC; S-(hydroxymethyl)glutathione dehydrogenase / alcohol dehydrogenase [EC:1.1.1.284 1.1.1.1]
comp13726_c0_seq1	K01557	FAHD1; acylpyruvate hydrolase [EC:3.7.1.5]
comp24329_c0_seq1	K00457	HPD, hppD; 4-hydroxyphenylpyruvate dioxygenase [EC:1.13.11.27]
comp11450_c0_seq1	K00001	E1.1.1.1, adh; alcohol dehydrogenase [EC:1.1.1.1]
comp52584_c0_seq1	K01593	DDC; aromatic-L-amino-acid decarboxylase [EC:4.1.1.28]
comp17318_c0_seq1	K00815	TAT; tyrosine aminotransferase [EC:2.6.1.5]
comp25599_c0_seq2	K01800	maiA, GSTZ1; maleylacetoacetate isomerase [EC:5.2.1.2]
comp17908_c0_seq1	K00599	E2.1.1.-; [EC:2.1.1.-]
comp20514_c0_seq1	K14454	GOT1; aspartate aminotransferase, cytoplasmic [EC:2.6.1.1]
comp27876_c0_seq1	K00121	frmA, ADH5, adhC; S-(hydroxymethyl)glutathione dehydrogenase / alcohol dehydrogenase [EC:1.1.1.284 1.1.1.1]
comp19923_c0_seq1	K01592	E4.1.1.25; tyrosine decarboxylase [EC:4.1.1.25]
comp22388_c0_seq1	K14455	GOT2; aspartate aminotransferase, mitochondrial [EC:2.6.1.1]
comp14714_c0_seq1	K00276	AOC3, AOC2, tynA; primary-amine oxidase [EC:1.4.3.21]
comp19178_c1_seq7	K00817	hisC; histidinol-phosphate aminotransferase [EC:2.6.1.9]
comp6848_c0_seq1	K00001	E1.1.1.1, adh; alcohol dehydrogenase [EC:1.1.1.1]
comp24375_c0_seq18	K00599	E2.1.1.-; [EC:2.1.1.-]
comp20215_c0_seq1	K14454	GOT1; aspartate aminotransferase, cytoplasmic [EC:2.6.1.1]
comp24606_c0_seq19	K00451	HGD, hmgA; homogentisate 1,2-dioxygenase [EC:1.13.11.5]
comp18023_c0_seq1	K01555	FAH, fahA; fumarylacetoacetase [EC:3.7.1.2]
comp14025_c0_seq2	K00811	ASP5; aspartate aminotransferase, chloroplastic [EC:2.6.1.1]
comp573_c0_seq2	K00121	frmA, ADH5, adhC; S-(hydroxymethyl)glutathione dehydrogenase / alcohol dehydrogenase [EC:1.1.1.284 1.1.1.1]
comp22955_c1_seq1	K00813	aspC; aspartate aminotransferase [EC:2.6.1.1]
comp59123_c0_seq1	K00224	E1.3.1.-; [EC:1.3.1.-]
comp17008_c0_seq1	K00815	TAT; tyrosine aminotransferase [EC:2.6.1.5]
comp18269_c0_seq1	K01904	E6.2.1.12; 4-coumarate--CoA ligase [EC:6.2.1.12]
comp18408_c0_seq1	K00815	TAT; tyrosine aminotransferase [EC:2.6.1.5]
comp18615_c0_seq2	K00430	E1.11.1.7; peroxidase [EC:1.11.1.7]
comp49145_c0_seq1	K00430	E1.11.1.7; peroxidase [EC:1.11.1.7]
comp52369_c0_seq1	K01904	E6.2.1.12; 4-coumarate--CoA ligase [EC:6.2.1.12]
comp94074_c0_seq1	K00430	E1.11.1.7; peroxidase [EC:1.11.1.7]
comp31966_c0_seq1	K00430	E1.11.1.7; peroxidase [EC:1.11.1.7]
comp18519_c0_seq2	K00430	E1.11.1.7; peroxidase [EC:1.11.1.7]
comp15797_c0_seq1	K00430	E1.11.1.7; peroxidase [EC:1.11.1.7]
comp23686_c0_seq3	K00430	E1.11.1.7; peroxidase [EC:1.11.1.7]
comp21346_c0_seq1	K10775	E4.3.1.24; phenylalanine ammonia-lyase [EC:4.3.1.24]
comp24329_c0_seq1	K00457	HPD, hppD; 4-hydroxyphenylpyruvate dioxygenase [EC:1.13.11.27]
comp10405_c0_seq2	K01904	E6.2.1.12; 4-coumarate--CoA ligase [EC:6.2.1.12]
comp33345_c0_seq1	K00430	E1.11.1.7; peroxidase [EC:1.11.1.7]
comp14615_c0_seq1	K00430	E1.11.1.7; peroxidase [EC:1.11.1.7]
comp52584_c0_seq1	K01593	DDC; aromatic-L-amino-acid decarboxylase [EC:4.1.1.28]
comp14708_c0_seq2	K00430	E1.11.1.7; peroxidase [EC:1.11.1.7]
comp31798_c0_seq1	K00074	paaH, hbd, fadB, mmgB; 3-hydroxybutyryl-CoA dehydrogenase [EC:1.1.1.157]
comp17318_c0_seq1	K00815	TAT; tyrosine aminotransferase [EC:2.6.1.5]
comp20514_c0_seq1	K14454	GOT1; aspartate aminotransferase, cytoplasmic [EC:2.6.1.1]
comp78175_c0_seq1	K00430	E1.11.1.7; peroxidase [EC:1.11.1.7]
comp162581_c0_seq1	K00430	E1.11.1.7; peroxidase [EC:1.11.1.7]
comp22388_c0_seq1	K14455	GOT2; aspartate aminotransferase, mitochondrial [EC:2.6.1.1]
comp14714_c0_seq1	K00276	AOC3, AOC2, tynA; primary-amine oxidase [EC:1.4.3.21]
comp19178_c1_seq7	K00817	hisC; histidinol-phosphate aminotransferase [EC:2.6.1.9]
comp32523_c0_seq1	K00588	E2.1.1.104; caffeoyl-CoA O-methyltransferase [EC:2.1.1.104]
comp9892_c0_seq1	K00430	E1.11.1.7; peroxidase [EC:1.11.1.7]
comp54380_c0_seq1	K00430	E1.11.1.7; peroxidase [EC:1.11.1.7]
comp15750_c0_seq1	K00430	E1.11.1.7; peroxidase [EC:1.11.1.7]
comp20215_c0_seq1	K14454	GOT1; aspartate aminotransferase, cytoplasmic [EC:2.6.1.1]
comp21597_c0_seq1	K00487	CYP73A; trans-cinnamate 4-monooxygenase [EC:1.14.13.11]
comp14025_c0_seq2	K00811	ASP5; aspartate aminotransferase, chloroplastic [EC:2.6.1.1]
comp16971_c0_seq4	K01904	E6.2.1.12; 4-coumarate--CoA ligase [EC:6.2.1.12]
comp15241_c0_seq1	K00430	E1.11.1.7; peroxidase [EC:1.11.1.7]
comp22955_c1_seq1	K00813	aspC; aspartate aminotransferase [EC:2.6.1.1]
comp17713_c0_seq1	K00430	E1.11.1.7; peroxidase [EC:1.11.1.7]
comp7251_c0_seq1	K01061	E3.1.1.45; carboxymethylenebutenolidase [EC:3.1.1.45]
comp59123_c0_seq1	K00224	E1.3.1.-; [EC:1.3.1.-]
comp12034_c0_seq1	K00626	E2.3.1.9, atoB; acetyl-CoA C-acetyltransferase [EC:2.3.1.9]
comp16100_c0_seq1	K07513	ACAA1; acetyl-CoA acyltransferase 1 [EC:2.3.1.16]
comp31798_c0_seq1	K00074	paaH, hbd, fadB, mmgB; 3-hydroxybutyryl-CoA dehydrogenase [EC:1.1.1.157]
comp21286_c0_seq1	K00517	E1.14.-.-; [EC:1.14.-.-]
comp6491_c0_seq1	K00517	E1.14.-.-; [EC:1.14.-.-]
comp16201_c0_seq1	K00517	E1.14.-.-; [EC:1.14.-.-]
comp17697_c0_seq1	K00517	E1.14.-.-; [EC:1.14.-.-]
comp78794_c0_seq1	K00517	E1.14.-.-; [EC:1.14.-.-]
comp21090_c0_seq1	K00517	E1.14.-.-; [EC:1.14.-.-]
comp30843_c0_seq1	K00517	E1.14.-.-; [EC:1.14.-.-]
comp63643_c0_seq1	K00517	E1.14.-.-; [EC:1.14.-.-]
comp7251_c0_seq1	K01061	E3.1.1.45; carboxymethylenebutenolidase [EC:3.1.1.45]
comp12034_c0_seq1	K00626	E2.3.1.9, atoB; acetyl-CoA C-acetyltransferase [EC:2.3.1.9]
comp18302_c0_seq1	K00128	E1.2.1.3; aldehyde dehydrogenase (NAD+) [EC:1.2.1.3]
comp15968_c0_seq1	K07130	kynB; arylformamidase [EC:3.5.1.9]
comp25512_c1_seq9	K14085	ALDH7A1; aldehyde dehydrogenase family 7 member A1 [EC:1.2.1.31 1.2.1.8 1.2.1.3]
comp20685_c0_seq1	K07408	CYP1A1; cytochrome P450, family 1, subfamily A, polypeptide 1 [EC:1.14.14.1]
comp27099_c0_seq1	K00128	E1.2.1.3; aldehyde dehydrogenase (NAD+) [EC:1.2.1.3]
comp1528_c0_seq1	K11818	CYP83B1; cytochrome P450, family 83, subfamily B, polypeptide 1 [EC:1.14.-.-]
comp52584_c0_seq1	K01593	DDC; aromatic-L-amino-acid decarboxylase [EC:4.1.1.28]
comp15118_c0_seq1	K11820	UGT74B1; N-hydroxythioamide S-beta-glucosyltransferase [EC:2.4.1.195]
comp16901_c0_seq1	K00128	E1.2.1.3; aldehyde dehydrogenase (NAD+) [EC:1.2.1.3]
comp21233_c0_seq2	K03781	katE, CAT, catB, srpA; catalase [EC:1.11.1.6]
comp24875_c2_seq1	K00164	OGDH, sucA; 2-oxoglutarate dehydrogenase E1 component [EC:1.2.4.2]
comp90130_c0_seq1	K07408	CYP1A1; cytochrome P450, family 1, subfamily A, polypeptide 1 [EC:1.14.14.1]
comp19522_c0_seq2	K16903	TAA1; L-tryptophan---pyruvate aminotransferase [EC:2.6.1.99]
comp20015_c0_seq2	K11816	YUCCA; indole-3-pyruvate monooxygenase [EC:1.14.13.168]
comp24421_c0_seq1	K11816	YUCCA; indole-3-pyruvate monooxygenase [EC:1.14.13.168]
comp76210_c0_seq1	K00128	E1.2.1.3; aldehyde dehydrogenase (NAD+) [EC:1.2.1.3]
comp17008_c0_seq1	K00815	TAT; tyrosine aminotransferase [EC:2.6.1.5]
comp18408_c0_seq1	K00815	TAT; tyrosine aminotransferase [EC:2.6.1.5]
comp11774_c1_seq1	K01626	E2.5.1.54, aroF, aroG, aroH; 3-deoxy-7-phosphoheptulonate synthase [EC:2.5.1.54]
comp16594_c0_seq4	K00891	E2.7.1.71, aroK, aroL; shikimate kinase [EC:2.7.1.71]
comp18343_c0_seq1	K01696	trpB; tryptophan synthase beta chain [EC:4.2.1.20]
comp22530_c0_seq2	K00766	trpD; anthranilate phosphoribosyltransferase [EC:2.4.2.18]
comp16430_c0_seq1	K01695	trpA; tryptophan synthase alpha chain [EC:4.2.1.20]
comp19048_c1_seq1	K05359	ADT, PDT; arogenate/prephenate dehydratase [EC:4.2.1.91 4.2.1.51]
comp15594_c0_seq4	K05359	ADT, PDT; arogenate/prephenate dehydratase [EC:4.2.1.91 4.2.1.51]
comp13661_c0_seq1	K01736	aroC; chorismate synthase [EC:4.2.3.5]
comp15048_c0_seq1	K01735	aroB; 3-dehydroquinate synthase [EC:4.2.3.4]
comp39965_c0_seq1	K00014	aroE; shikimate dehydrogenase [EC:1.1.1.25]
comp44984_c0_seq1	K15227	TYRAAT; arogenate dehydrogenase (NADP+), plant [EC:1.3.1.78]
comp20742_c1_seq1	K13832	aroDE, DHQ-SDH; 3-dehydroquinate dehydratase / shikimate dehydrogenase [EC:4.2.1.10 1.1.1.25]
comp22093_c1_seq1	K01850	E5.4.99.5; chorismate mutase [EC:5.4.99.5]
comp17318_c0_seq1	K00815	TAT; tyrosine aminotransferase [EC:2.6.1.5]
comp40172_c0_seq1	K01817	trpF; phosphoribosylanthranilate isomerase [EC:5.3.1.24]
comp20514_c0_seq1	K14454	GOT1; aspartate aminotransferase, cytoplasmic [EC:2.6.1.1]
comp22388_c0_seq1	K14455	GOT2; aspartate aminotransferase, mitochondrial [EC:2.6.1.1]
comp11396_c0_seq2	K01609	trpC; indole-3-glycerol phosphate synthase [EC:4.1.1.48]
comp19178_c1_seq7	K00817	hisC; histidinol-phosphate aminotransferase [EC:2.6.1.9]
comp37289_c0_seq1	K15227	TYRAAT; arogenate dehydrogenase (NADP+), plant [EC:1.3.1.78]
comp57775_c0_seq1	K04517	tyrA2; prephenate dehydrogenase [EC:1.3.1.12]
comp23442_c0_seq34	K01657	trpE; anthranilate synthase component I [EC:4.1.3.27]
comp6371_c0_seq1	K00891	E2.7.1.71, aroK, aroL; shikimate kinase [EC:2.7.1.71]
comp12363_c0_seq2	K01657	trpE; anthranilate synthase component I [EC:4.1.3.27]
comp8354_c0_seq1	K00800	aroA; 3-phosphoshikimate 1-carboxyvinyltransferase [EC:2.5.1.19]
comp20215_c0_seq1	K14454	GOT1; aspartate aminotransferase, cytoplasmic [EC:2.6.1.1]
comp15360_c0_seq1	K06001	K06001, trpB; tryptophan synthase beta chain [EC:4.2.1.20]
comp21888_c0_seq1	K01626	E2.5.1.54, aroF, aroG, aroH; 3-deoxy-7-phosphoheptulonate synthase [EC:2.5.1.54]
comp14025_c0_seq2	K00811	ASP5; aspartate aminotransferase, chloroplastic [EC:2.6.1.1]
comp22955_c1_seq1	K00813	aspC; aspartate aminotransferase [EC:2.6.1.1]
comp113049_c0_seq1	K00014	aroE; shikimate dehydrogenase [EC:1.1.1.25]
comp17008_c0_seq1	K00815	TAT; tyrosine aminotransferase [EC:2.6.1.5]
comp18408_c0_seq1	K00815	TAT; tyrosine aminotransferase [EC:2.6.1.5]
comp17318_c0_seq1	K00815	TAT; tyrosine aminotransferase [EC:2.6.1.5]
comp19178_c1_seq7	K00817	hisC; histidinol-phosphate aminotransferase [EC:2.6.1.9]
comp57775_c0_seq1	K04517	tyrA2; prephenate dehydrogenase [EC:1.3.1.12]
comp22955_c1_seq1	K00813	aspC; aspartate aminotransferase [EC:2.6.1.1]
comp18302_c0_seq1	K00128	E1.2.1.3; aldehyde dehydrogenase (NAD+) [EC:1.2.1.3]
comp7135_c0_seq1	K05605	HIBCH; 3-hydroxyisobutyryl-CoA hydrolase [EC:3.1.2.4]
comp24357_c0_seq1	K01580	E4.1.1.15, gadB, gadA, GAD; glutamate decarboxylase [EC:4.1.1.15]
comp25512_c1_seq9	K14085	ALDH7A1; aldehyde dehydrogenase family 7 member A1 [EC:1.2.1.31 1.2.1.8 1.2.1.3]
comp23848_c0_seq2	K01578	E4.1.1.9, MLYCD; malonyl-CoA decarboxylase [EC:4.1.1.9]
comp24214_c1_seq2	K00797	speE, SRM; spermidine synthase [EC:2.5.1.16]
comp22191_c0_seq7	K00140	mmsA, iolA, ALDH6A1; malonate-semialdehyde dehydrogenase (acetylating) / methylmalonate-semialdehyde dehydrogenase [EC:1.2.1.18 1.2.1.27]
comp29497_c0_seq1	K00797	speE, SRM; spermidine synthase [EC:2.5.1.16]
comp27099_c0_seq1	K00128	E1.2.1.3; aldehyde dehydrogenase (NAD+) [EC:1.2.1.3]
comp23956_c0_seq4	K05605	HIBCH; 3-hydroxyisobutyryl-CoA hydrolase [EC:3.1.2.4]
comp30339_c0_seq1	K01580	E4.1.1.15, gadB, gadA, GAD; glutamate decarboxylase [EC:4.1.1.15]
comp7247_c0_seq1	K01580	E4.1.1.15, gadB, gadA, GAD; glutamate decarboxylase [EC:4.1.1.15]
comp16901_c0_seq1	K00128	E1.2.1.3; aldehyde dehydrogenase (NAD+) [EC:1.2.1.3]
comp21559_c0_seq1	K05605	HIBCH; 3-hydroxyisobutyryl-CoA hydrolase [EC:3.1.2.4]
comp14714_c0_seq1	K00276	AOC3, AOC2, tynA; primary-amine oxidase [EC:1.4.3.21]
comp24999_c0_seq1	K00249	ACADM, acd; acyl-CoA dehydrogenase [EC:1.3.8.7]
comp28038_c0_seq1	K00797	speE, SRM; spermidine synthase [EC:2.5.1.16]
comp21204_c0_seq1	K00207	DPYD; dihydropyrimidine dehydrogenase (NADP+) [EC:1.3.1.2]
comp35438_c0_seq1	K01431	UPB1; beta-ureidopropionase [EC:3.5.1.6]
comp23486_c0_seq3	K01464	DPYS, dht, hydA; dihydropyrimidinase [EC:3.5.2.2]
comp76210_c0_seq1	K00128	E1.2.1.3; aldehyde dehydrogenase (NAD+) [EC:1.2.1.3]
comp24357_c0_seq1	K01580	E4.1.1.15, gadB, gadA, GAD; glutamate decarboxylase [EC:4.1.1.15]
comp30339_c0_seq1	K01580	E4.1.1.15, gadB, gadA, GAD; glutamate decarboxylase [EC:4.1.1.15]
comp7247_c0_seq1	K01580	E4.1.1.15, gadB, gadA, GAD; glutamate decarboxylase [EC:4.1.1.15]
comp22934_c0_seq1	K00681	ggt; gamma-glutamyltranspeptidase [EC:2.3.2.2]
comp9000_c0_seq1	K10712	ADO; cysteamine dioxygenase [EC:1.13.11.19]
comp14026_c0_seq1	K10712	ADO; cysteamine dioxygenase [EC:1.13.11.19]
comp23584_c0_seq1	K00968	PCYT1; choline-phosphate cytidylyltransferase [EC:2.7.7.15]
comp18621_c0_seq1	K00967	PCYT2; ethanolamine-phosphate cytidylyltransferase [EC:2.7.7.14]
comp8032_c0_seq1	K00968	PCYT1; choline-phosphate cytidylyltransferase [EC:2.7.7.15]
comp24210_c0_seq1	K00967	PCYT2; ethanolamine-phosphate cytidylyltransferase [EC:2.7.7.14]
comp25866_c0_seq2	K00993	EPT1; ethanolaminephosphotransferase [EC:2.7.8.1]
comp19427_c0_seq1	K01739	metB; cystathionine gamma-synthase [EC:2.5.1.48]
comp11611_c0_seq1	K01874	MARS, metG; methionyl-tRNA synthetase [EC:6.1.1.10]
comp21247_c0_seq1	K13811	PAPSS; 3'-phosphoadenosine 5'-phosphosulfate synthase [EC:2.7.7.4 2.7.1.25]
comp26352_c0_seq3	K11717	sufS; cysteine desulfurase / selenocysteine lyase [EC:2.8.1.7 4.4.1.16]
comp24700_c1_seq6	K01760	metC; cystathionine beta-lyase [EC:4.4.1.8]
comp22879_c0_seq8	K00384	E1.8.1.9, trxB; thioredoxin reductase (NADPH) [EC:1.8.1.9]
comp20295_c0_seq1	K13811	PAPSS; 3'-phosphoadenosine 5'-phosphosulfate synthase [EC:2.7.7.4 2.7.1.25]
comp25552_c0_seq4	K01874	MARS, metG; methionyl-tRNA synthetase [EC:6.1.1.10]
comp22375_c0_seq1	K08247	E2.1.1.12; methionine S-methyltransferase [EC:2.1.1.12]
comp19392_c0_seq1	K00549	metE; 5-methyltetrahydropteroyltriglutamate--homocysteine methyltransferase [EC:2.1.1.14]
comp19017_c0_seq1	K00384	E1.8.1.9, trxB; thioredoxin reductase (NADPH) [EC:1.8.1.9]
comp7631_c0_seq1	K01761	E4.4.1.11; methionine-gamma-lyase [EC:4.4.1.11]
comp25678_c0_seq1	K00384	E1.8.1.9, trxB; thioredoxin reductase (NADPH) [EC:1.8.1.9]
comp25309_c0_seq1	K05349	bglX; beta-glucosidase [EC:3.2.1.21]
comp26217_c0_seq1	K13035	NIT4; beta-cyano-L-alanine hydratase/nitrilase [EC:3.5.5.1 3.5.5.4]
comp7589_c0_seq1	K00600	glyA, SHMT; glycine hydroxymethyltransferase [EC:2.1.2.1]
comp22458_c0_seq3	K01188	E3.2.1.21; beta-glucosidase [EC:3.2.1.21]
comp14509_c1_seq2	K00600	glyA, SHMT; glycine hydroxymethyltransferase [EC:2.1.2.1]
comp31612_c0_seq1	K13034	ATCYSC1; L-3-cyanoalanine synthase/ cysteine synthase [EC:2.5.1.47 4.4.1.9]
comp8351_c0_seq1	K01188	E3.2.1.21; beta-glucosidase [EC:3.2.1.21]
comp26324_c1_seq20	K00600	glyA, SHMT; glycine hydroxymethyltransferase [EC:2.1.2.1]
comp21290_c0_seq1	K05350	bglB; beta-glucosidase [EC:3.2.1.21]
comp30139_c0_seq1	K00600	glyA, SHMT; glycine hydroxymethyltransferase [EC:2.1.2.1]
comp24115_c0_seq1	K12153	CYP79A2; cytochrome P450, family 79, subfamily A, polypeptide 2 (phenylalanine N-monooxygenase) [EC:1.14.13.124]
comp16291_c0_seq1	K01188	E3.2.1.21; beta-glucosidase [EC:3.2.1.21]
comp22941_c0_seq1	K01188	E3.2.1.21; beta-glucosidase [EC:3.2.1.21]
comp22934_c0_seq1	K00681	ggt; gamma-glutamyltranspeptidase [EC:2.3.2.2]
comp25994_c0_seq4	K05349	bglX; beta-glucosidase [EC:3.2.1.21]
comp105809_c0_seq1	K01188	E3.2.1.21; beta-glucosidase [EC:3.2.1.21]
comp59983_c0_seq1	K05350	bglB; beta-glucosidase [EC:3.2.1.21]
comp25405_c1_seq1	K00600	glyA, SHMT; glycine hydroxymethyltransferase [EC:2.1.2.1]
comp140318_c0_seq1	K01924	murC; UDP-N-acetylmuramate--alanine ligase [EC:6.3.2.8]
comp19271_c0_seq1	K00261	GLUD1_2, gdhA; glutamate dehydrogenase (NAD(P)+) [EC:1.4.1.3]
comp2197_c0_seq1	K00434	E1.11.1.11; L-ascorbate peroxidase [EC:1.11.1.11]
comp21513_c0_seq1	K00036	G6PD, zwf; glucose-6-phosphate 1-dehydrogenase [EC:1.1.1.49]
comp20811_c0_seq1	K00799	GST, gst; glutathione S-transferase [EC:2.5.1.18]
comp18079_c1_seq1	K00031	IDH1, IDH2, icd; isocitrate dehydrogenase [EC:1.1.1.42]
comp18036_c0_seq1	K00799	GST, gst; glutathione S-transferase [EC:2.5.1.18]
comp21458_c0_seq2	K00033	PGD, gnd; 6-phosphogluconate dehydrogenase [EC:1.1.1.44]
comp6872_c0_seq1	K00036	G6PD, zwf; glucose-6-phosphate 1-dehydrogenase [EC:1.1.1.49]
comp8227_c0_seq1	K00432	E1.11.1.9; glutathione peroxidase [EC:1.11.1.9]
comp7587_c0_seq1	K00799	GST, gst; glutathione S-transferase [EC:2.5.1.18]
comp23009_c0_seq1	K01255	CARP, pepA; leucyl aminopeptidase [EC:3.4.11.1]
comp24214_c1_seq2	K00797	speE, SRM; spermidine synthase [EC:2.5.1.16]
comp29497_c0_seq1	K00797	speE, SRM; spermidine synthase [EC:2.5.1.16]
comp41775_c0_seq1	K00799	GST, gst; glutathione S-transferase [EC:2.5.1.18]
comp45159_c0_seq1	K00799	GST, gst; glutathione S-transferase [EC:2.5.1.18]
comp28239_c0_seq1	K00432	E1.11.1.9; glutathione peroxidase [EC:1.11.1.9]
comp14531_c0_seq1	K00434	E1.11.1.11; L-ascorbate peroxidase [EC:1.11.1.11]
comp27344_c0_seq1	K00799	GST, gst; glutathione S-transferase [EC:2.5.1.18]
comp7953_c0_seq1	K00432	E1.11.1.9; glutathione peroxidase [EC:1.11.1.9]
comp33923_c0_seq1	K01469	E3.5.2.9; 5-oxoprolinase (ATP-hydrolysing) [EC:3.5.2.9]
comp18455_c0_seq1	K00799	GST, gst; glutathione S-transferase [EC:2.5.1.18]
comp7358_c0_seq1	K00799	GST, gst; glutathione S-transferase [EC:2.5.1.18]
comp85282_c0_seq1	K00799	GST, gst; glutathione S-transferase [EC:2.5.1.18]
comp25777_c0_seq1	K00036	G6PD, zwf; glucose-6-phosphate 1-dehydrogenase [EC:1.1.1.49]
comp23675_c0_seq1	K00432	E1.11.1.9; glutathione peroxidase [EC:1.11.1.9]
comp22866_c0_seq1	K00031	IDH1, IDH2, icd; isocitrate dehydrogenase [EC:1.1.1.42]
comp23388_c0_seq1	K00799	GST, gst; glutathione S-transferase [EC:2.5.1.18]
comp21362_c0_seq1	K00434	E1.11.1.11; L-ascorbate peroxidase [EC:1.11.1.11]
comp22934_c0_seq1	K00681	ggt; gamma-glutamyltranspeptidase [EC:2.3.2.2]
comp8262_c0_seq2	K01919	gshA; glutamate--cysteine ligase [EC:6.3.2.2]
comp28038_c0_seq1	K00797	speE, SRM; spermidine synthase [EC:2.5.1.16]
comp24017_c0_seq2	K00432	E1.11.1.9; glutathione peroxidase [EC:1.11.1.9]
comp13738_c0_seq1	K00799	GST, gst; glutathione S-transferase [EC:2.5.1.18]
comp4967_c0_seq1	K00799	GST, gst; glutathione S-transferase [EC:2.5.1.18]
comp23763_c0_seq2	K00383	E1.8.1.7, GSR, gor; glutathione reductase (NADPH) [EC:1.8.1.7]
comp7281_c0_seq1	K00434	E1.11.1.11; L-ascorbate peroxidase [EC:1.11.1.11]
comp22487_c1_seq2	K01920	E6.3.2.3, gshB; glutathione synthase [EC:6.3.2.3]
comp7363_c0_seq1	K10808	RRM2; ribonucleoside-diphosphate reductase subunit M2 [EC:1.17.4.1]
comp40223_c0_seq1	K00799	GST, gst; glutathione S-transferase [EC:2.5.1.18]
comp18593_c0_seq1	K00434	E1.11.1.11; L-ascorbate peroxidase [EC:1.11.1.11]
comp11782_c0_seq2	K01256	pepN; aminopeptidase N [EC:3.4.11.2]
comp28794_c0_seq1	K00383	E1.8.1.7, GSR, gor; glutathione reductase (NADPH) [EC:1.8.1.7]
comp23596_c0_seq1	K10807	RRM1; ribonucleoside-diphosphate reductase subunit M1 [EC:1.17.4.1]
comp31606_c0_seq1	K00033	PGD, gnd; 6-phosphogluconate dehydrogenase [EC:1.1.1.44]
comp12037_c0_seq1	K00799	GST, gst; glutathione S-transferase [EC:2.5.1.18]
comp25309_c0_seq1	K05349	bglX; beta-glucosidase [EC:3.2.1.21]
comp17875_c0_seq1	K01210	E3.2.1.58; glucan 1,3-beta-glucosidase [EC:3.2.1.58]
comp21645_c1_seq2	K00699	UGT; glucuronosyltransferase [EC:2.4.1.17]
comp27563_c0_seq1	K00847	E2.7.1.4, scrK; fructokinase [EC:2.7.1.4]
comp9466_c0_seq1	K01810	GPI, pgi; glucose-6-phosphate isomerase [EC:5.3.1.9]
comp25517_c0_seq1	K01212	sacC; levanase [EC:3.2.1.65]
comp25388_c0_seq1	K00699	UGT; glucuronosyltransferase [EC:2.4.1.17]
comp25998_c0_seq1	K16055	TPS; trehalose 6-phosphate synthase/phosphatase [EC:2.4.1.15 3.1.3.12]
comp46737_c0_seq1	K00699	UGT; glucuronosyltransferase [EC:2.4.1.17]
comp19920_c0_seq2	K00975	glgC; glucose-1-phosphate adenylyltransferase [EC:2.7.7.27]
comp22458_c0_seq3	K01188	E3.2.1.21; beta-glucosidase [EC:3.2.1.21]
comp8179_c0_seq1	K13648	GAUT; alpha-1,4-galacturonosyltransferase [EC:2.4.1.43]
comp79507_c0_seq1	K01193	E3.2.1.26, sacA; beta-fructofuranosidase [EC:3.2.1.26]
comp149427_c0_seq1	K00699	UGT; glucuronosyltransferase [EC:2.4.1.17]
comp22426_c0_seq3	K13648	GAUT; alpha-1,4-galacturonosyltransferase [EC:2.4.1.43]
comp14280_c0_seq1	K16055	TPS; trehalose 6-phosphate synthase/phosphatase [EC:2.4.1.15 3.1.3.12]
comp25977_c0_seq1	K00699	UGT; glucuronosyltransferase [EC:2.4.1.17]
comp33977_c0_seq1	K00847	E2.7.1.4, scrK; fructokinase [EC:2.7.1.4]
comp8351_c0_seq1	K01188	E3.2.1.21; beta-glucosidase [EC:3.2.1.21]
comp39946_c0_seq1	K13648	GAUT; alpha-1,4-galacturonosyltransferase [EC:2.4.1.43]
comp20047_c0_seq2	K01051	E3.1.1.11; pectinesterase [EC:3.1.1.11]
comp56697_c0_seq1	K00699	UGT; glucuronosyltransferase [EC:2.4.1.17]
comp26138_c0_seq28	K02438	treX, glgX; glycogen operon protein [EC:3.2.1.-]
comp26166_c0_seq15	K00705	malQ; 4-alpha-glucanotransferase [EC:2.4.1.25]
comp22002_c0_seq2	K01087	otsB; trehalose 6-phosphate phosphatase [EC:3.1.3.12]
comp24791_c0_seq1	K00696	E2.4.1.14; sucrose-phosphate synthase [EC:2.4.1.14]
comp18320_c0_seq1	K16055	TPS; trehalose 6-phosphate synthase/phosphatase [EC:2.4.1.15 3.1.3.12]
comp21290_c0_seq1	K05350	bglB; beta-glucosidase [EC:3.2.1.21]
comp18245_c0_seq1	K00699	UGT; glucuronosyltransferase [EC:2.4.1.17]
comp18499_c0_seq1	K01177	E3.2.1.2; beta-amylase [EC:3.2.1.2]
comp25903_c0_seq2	K01194	E3.2.1.28, treA, treF; alpha,alpha-trehalase [EC:3.2.1.28]
comp11392_c0_seq1	K00695	E2.4.1.13; sucrose synthase [EC:2.4.1.13]
comp11770_c1_seq1	K01835	pgm; phosphoglucomutase [EC:5.4.2.2]
comp8386_c0_seq1	K08679	E5.1.3.6; UDP-glucuronate 4-epimerase [EC:5.1.3.6]
comp24165_c1_seq1	K00844	HK; hexokinase [EC:2.7.1.1]
comp26334_c0_seq1	K00770	E2.4.2.24; 1,4-beta-D-xylan synthase [EC:2.4.2.24]
comp103515_c0_seq1	K01051	E3.1.1.11; pectinesterase [EC:3.1.1.11]
comp7720_c0_seq1	K01051	E3.1.1.11; pectinesterase [EC:3.1.1.11]
comp26104_c2_seq1	K01051	E3.1.1.11; pectinesterase [EC:3.1.1.11]
comp33943_c0_seq1	K16055	TPS; trehalose 6-phosphate synthase/phosphatase [EC:2.4.1.15 3.1.3.12]
comp21176_c0_seq2	K00700	glgB; 1,4-alpha-glucan branching enzyme [EC:2.4.1.18]
comp24251_c0_seq2	K16055	TPS; trehalose 6-phosphate synthase/phosphatase [EC:2.4.1.15 3.1.3.12]
comp23556_c0_seq2	K13648	GAUT; alpha-1,4-galacturonosyltransferase [EC:2.4.1.43]
comp21178_c0_seq1	K13648	GAUT; alpha-1,4-galacturonosyltransferase [EC:2.4.1.43]
comp18410_c0_seq7	K16055	TPS; trehalose 6-phosphate synthase/phosphatase [EC:2.4.1.15 3.1.3.12]
comp16291_c0_seq1	K01188	E3.2.1.21; beta-glucosidase [EC:3.2.1.21]
comp24011_c0_seq6	K00703	E2.4.1.21, glgA; starch synthase [EC:2.4.1.21]
comp23530_c0_seq1	K01179	E3.2.1.4; endoglucanase [EC:3.2.1.4]
comp22941_c0_seq1	K01188	E3.2.1.21; beta-glucosidase [EC:3.2.1.21]
comp24405_c0_seq3	K00705	malQ; 4-alpha-glucanotransferase [EC:2.4.1.25]
comp95188_c0_seq1	K00699	UGT; glucuronosyltransferase [EC:2.4.1.17]
comp25107_c0_seq1	K01193	E3.2.1.26, sacA; beta-fructofuranosidase [EC:3.2.1.26]
comp16240_c1_seq1	K13648	GAUT; alpha-1,4-galacturonosyltransferase [EC:2.4.1.43]
comp21109_c0_seq1	K13648	GAUT; alpha-1,4-galacturonosyltransferase [EC:2.4.1.43]
comp7956_c0_seq2	K00699	UGT; glucuronosyltransferase [EC:2.4.1.17]
comp23073_c0_seq1	K00963	UGP2, galU, galF; UTP--glucose-1-phosphate uridylyltransferase [EC:2.7.7.9]
comp18333_c0_seq1	K00012	UGDH, ugd; UDPglucose 6-dehydrogenase [EC:1.1.1.22]
comp55657_c0_seq1	K01051	E3.1.1.11; pectinesterase [EC:3.1.1.11]
comp25994_c0_seq4	K05349	bglX; beta-glucosidase [EC:3.2.1.21]
comp19322_c0_seq2	K01087	otsB; trehalose 6-phosphate phosphatase [EC:3.1.3.12]
comp18829_c0_seq2	K01087	otsB; trehalose 6-phosphate phosphatase [EC:3.1.3.12]
comp10265_c0_seq1	K00847	E2.7.1.4, scrK; fructokinase [EC:2.7.1.4]
comp7157_c0_seq1	K01051	E3.1.1.11; pectinesterase [EC:3.1.1.11]
comp217287_c0_seq1	K01184	E3.2.1.15; polygalacturonase [EC:3.2.1.15]
comp6780_c0_seq2	K01193	E3.2.1.26, sacA; beta-fructofuranosidase [EC:3.2.1.26]
comp7775_c0_seq1	K00696	E2.4.1.14; sucrose-phosphate synthase [EC:2.4.1.14]
comp28014_c0_seq1	K00975	glgC; glucose-1-phosphate adenylyltransferase [EC:2.7.7.27]
comp25584_c0_seq15	K01835	pgm; phosphoglucomutase [EC:5.4.2.2]
comp15467_c0_seq1	K00844	HK; hexokinase [EC:2.7.1.1]
comp18943_c0_seq2	K00695	E2.4.1.13; sucrose synthase [EC:2.4.1.13]
comp14395_c0_seq1	K00699	UGT; glucuronosyltransferase [EC:2.4.1.17]
comp12880_c0_seq1	K00703	E2.4.1.21, glgA; starch synthase [EC:2.4.1.21]
comp32613_c0_seq1	K16148	glgA; starch synthase [EC:2.4.1.21]
comp25242_c0_seq3	K02438	treX, glgX; glycogen operon protein [EC:3.2.1.-]
comp24411_c0_seq1	K13648	GAUT; alpha-1,4-galacturonosyltransferase [EC:2.4.1.43]
comp22318_c0_seq1	K00688	E2.4.1.1, glgP, PYG; starch phosphorylase [EC:2.4.1.1]
comp17233_c0_seq2	K01193	E3.2.1.26, sacA; beta-fructofuranosidase [EC:3.2.1.26]
comp105809_c0_seq1	K01188	E3.2.1.21; beta-glucosidase [EC:3.2.1.21]
comp20470_c0_seq1	K15920	XYL4; beta-D-xylosidase 4 [EC:3.2.1.37]
comp6908_c0_seq1	K01177	E3.2.1.2; beta-amylase [EC:3.2.1.2]
comp19439_c1_seq2	K13648	GAUT; alpha-1,4-galacturonosyltransferase [EC:2.4.1.43]
comp20245_c0_seq1	K08679	E5.1.3.6; UDP-glucuronate 4-epimerase [EC:5.1.3.6]
comp7924_c0_seq1	K00700	glgB; 1,4-alpha-glucan branching enzyme [EC:2.4.1.18]
comp6104_c0_seq1	K01087	otsB; trehalose 6-phosphate phosphatase [EC:3.1.3.12]
comp17937_c0_seq1	K01187	E3.2.1.20, malZ; alpha-glucosidase [EC:3.2.1.20]
comp12011_c0_seq1	K01810	GPI, pgi; glucose-6-phosphate isomerase [EC:5.3.1.9]
comp19035_c0_seq9	K01051	E3.1.1.11; pectinesterase [EC:3.1.1.11]
comp59983_c0_seq1	K05350	bglB; beta-glucosidase [EC:3.2.1.21]
comp24554_c0_seq6	K01231	MAN2; alpha-mannosidase II [EC:3.2.1.114]
comp26050_c0_seq30	K01230	MAN1; mannosyl-oligosaccharide alpha-1,2-mannosidase [EC:3.2.1.113]
comp14080_c1_seq1	K00721	DPM1; dolichol-phosphate mannosyltransferase [EC:2.4.1.83]
comp15894_c0_seq2	K01230	MAN1; mannosyl-oligosaccharide alpha-1,2-mannosidase [EC:3.2.1.113]
comp19030_c0_seq1	K07441	ALG14; beta-1,4-N-acetylglucosaminyltransferase [EC:2.4.1.141]
comp24897_c0_seq1	K05546	GANAB; alpha 1,3-glucosidase [EC:3.2.1.84]
comp16513_c0_seq2	K03844	ALG11; alpha-1,2-mannosyltransferase [EC:2.4.1.131]
comp24463_c0_seq7	K00726	MGAT1; alpha-1,3-mannosyl-glycoprotein beta-1,2-N-acetylglucosaminyltransferase [EC:2.4.1.101]
comp25826_c0_seq6	K01001	ALG7; UDP-N-acetylglucosamine--dolichyl-phosphate N-acetylglucosaminephosphotransferase [EC:2.7.8.15]
comp24116_c0_seq8	K03848	ALG6; alpha-1,3-glucosyltransferase [EC:2.4.1.267]
comp23730_c0_seq2	K03849	ALG8; alpha-1,3-glucosyltransferase [EC:2.4.1.265]
comp11902_c0_seq1	K00737	MGAT3; beta-1,4-mannosyl-glycoprotein beta-1,4-N-acetylglucosaminyltransferase [EC:2.4.1.144]
comp20973_c0_seq14	K03843	ALG2; alpha-1,3/alpha-1,6-mannosyltransferase [EC:2.4.1.132 2.4.1.257]
comp15543_c0_seq1	K07151	STT3; dolichyl-diphosphooligosaccharide--protein glycosyltransferase [EC:2.4.99.18]
comp24921_c1_seq4	K01228	GCS1; mannosyl-oligosaccharide glucosidase [EC:3.2.1.106]
comp23059_c0_seq4	K03845	ALG3; alpha-1,3-mannosyltransferase [EC:2.4.1.258]
comp14551_c0_seq3	K03842	ALG1; beta-1,4-mannosyltransferase [EC:2.4.1.142]
comp16357_c0_seq1	K00736	MGAT2; alpha-1,6-mannosyl-glycoprotein beta-1,2-N-acetylglucosaminyltransferase [EC:2.4.1.143]
comp24447_c0_seq18	K03847	ALG12; alpha-1,6-mannosyltransferase [EC:2.4.1.260]
comp25569_c0_seq5	K00902	E2.7.1.108; dolichol kinase [EC:2.7.1.108]
comp26395_c0_seq2	K00729	ALG5; dolichyl-phosphate beta-glucosyltransferase [EC:2.4.1.117]
comp25591_c0_seq1	K03846	ALG9; alpha-1,2-mannosyltransferase [EC:2.4.1.259 2.4.1.261]
comp25094_c1_seq2	K07252	E3.6.1.43; dolichyldiphosphatase [EC:3.6.1.43]
comp16522_c0_seq1	K00737	MGAT3; beta-1,4-mannosyl-glycoprotein beta-1,4-N-acetylglucosaminyltransferase [EC:2.4.1.144]
comp12435_c0_seq2	K01206	FUCA; alpha-L-fucosidase [EC:3.2.1.51]
comp26201_c0_seq1	K12309	GLB1, ELNR1; beta-galactosidase [EC:3.2.1.23]
comp26072_c0_seq18	K01227	E3.2.1.96; mannosyl-glycoprotein endo-beta-N-acetylglucosaminidase [EC:3.2.1.96]
comp20329_c1_seq1	K12373	HEXA_B; hexosaminidase [EC:3.2.1.52]
comp20329_c0_seq1	K12373	HEXA_B; hexosaminidase [EC:3.2.1.52]
comp18363_c0_seq2	K01206	FUCA; alpha-L-fucosidase [EC:3.2.1.51]
comp7137_c0_seq1	K01191	E3.2.1.24; alpha-mannosidase [EC:3.2.1.24]
comp26348_c0_seq50	K17108	GBA2; non-lysosomal glucosylceramidase [EC:3.2.1.45]
comp13173_c0_seq2	K12373	HEXA_B; hexosaminidase [EC:3.2.1.52]
comp22908_c0_seq5	K15923	AXY8, FUC95A, afcA; alpha-L-fucosidase 2 [EC:3.2.1.51]
comp7532_c0_seq1	K01190	lacZ; beta-galactosidase [EC:3.2.1.23]
comp26305_c0_seq14	K17108	GBA2; non-lysosomal glucosylceramidase [EC:3.2.1.45]
comp24554_c0_seq6	K01231	MAN2; alpha-mannosidase II [EC:3.2.1.114]
comp26050_c0_seq30	K01230	MAN1; mannosyl-oligosaccharide alpha-1,2-mannosidase [EC:3.2.1.113]
comp19337_c0_seq3	K00753	E2.4.1.214; glycoprotein 3-alpha-L-fucosyltransferase [EC:2.4.1.214]
comp15894_c0_seq2	K01230	MAN1; mannosyl-oligosaccharide alpha-1,2-mannosidase [EC:3.2.1.113]
comp19030_c0_seq1	K07441	ALG14; beta-1,4-N-acetylglucosaminyltransferase [EC:2.4.1.141]
comp16513_c0_seq2	K03844	ALG11; alpha-1,2-mannosyltransferase [EC:2.4.1.131]
comp23132_c0_seq1	K03714	E2.4.2.38; glycoprotein 2-beta-D-xylosyltransferase [EC:2.4.2.38]
comp24463_c0_seq7	K00726	MGAT1; alpha-1,3-mannosyl-glycoprotein beta-1,2-N-acetylglucosaminyltransferase [EC:2.4.1.101]
comp20973_c0_seq14	K03843	ALG2; alpha-1,3/alpha-1,6-mannosyltransferase [EC:2.4.1.132 2.4.1.257]
comp15543_c0_seq1	K07151	STT3; dolichyl-diphosphooligosaccharide--protein glycosyltransferase [EC:2.4.99.18]
comp23059_c0_seq4	K03845	ALG3; alpha-1,3-mannosyltransferase [EC:2.4.1.258]
comp14551_c0_seq3	K03842	ALG1; beta-1,4-mannosyltransferase [EC:2.4.1.142]
comp16357_c0_seq1	K00736	MGAT2; alpha-1,6-mannosyl-glycoprotein beta-1,2-N-acetylglucosaminyltransferase [EC:2.4.1.143]
comp25225_c2_seq1	K14412	FUT13, FucTC; alpha-1,4-fucosyltransferase [EC:2.4.1.-]
comp24447_c0_seq18	K03847	ALG12; alpha-1,6-mannosyltransferase [EC:2.4.1.260]
comp25591_c0_seq1	K03846	ALG9; alpha-1,2-mannosyltransferase [EC:2.4.1.259 2.4.1.261]
comp16138_c0_seq1	K03691	POFUT; peptide-O-fucosyltransferase [EC:2.4.1.221]
comp23563_c0_seq1	K09667	OGT; polypeptide N-acetylglucosaminyltransferase [EC:2.4.1.-]
comp23181_c0_seq1	K00965	galT, GALT; UDPglucose--hexose-1-phosphate uridylyltransferase [EC:2.7.7.12]
comp25858_c0_seq1	K01809	E5.3.1.8, manA; mannose-6-phosphate isomerase [EC:5.3.1.8]
comp27563_c0_seq1	K00847	E2.7.1.4, scrK; fructokinase [EC:2.7.1.4]
comp29428_c0_seq1	K02377	TSTA3, fcl; GDP-L-fucose synthase [EC:1.1.1.271]
comp9466_c0_seq1	K01810	GPI, pgi; glucose-6-phosphate isomerase [EC:5.3.1.9]
comp19920_c0_seq2	K00975	glgC; glucose-1-phosphate adenylyltransferase [EC:2.7.7.27]
comp5139_c0_seq3	K01183	E3.2.1.14; chitinase [EC:3.2.1.14]
comp8179_c0_seq1	K13648	GAUT; alpha-1,4-galacturonosyltransferase [EC:2.4.1.43]
comp18765_c0_seq1	K01784	galE, GALE; UDP-glucose 4-epimerase [EC:5.1.3.2]
comp19250_c0_seq1	K00820	E2.6.1.16, glmS; glucosamine--fructose-6-phosphate aminotransferase (isomerizing) [EC:2.6.1.16]
comp22426_c0_seq3	K13648	GAUT; alpha-1,4-galacturonosyltransferase [EC:2.4.1.43]
comp23851_c0_seq1	K01183	E3.2.1.14; chitinase [EC:3.2.1.14]
comp33977_c0_seq1	K00847	E2.7.1.4, scrK; fructokinase [EC:2.7.1.4]
comp20059_c0_seq2	K00972	UAP1; UDP-N-acetylglucosamine pyrophosphorylase [EC:2.7.7.23]
comp39946_c0_seq1	K13648	GAUT; alpha-1,4-galacturonosyltransferase [EC:2.4.1.43]
comp24852_c0_seq1	K01183	E3.2.1.14; chitinase [EC:3.2.1.14]
comp16756_c0_seq1	K00966	GMPP; mannose-1-phosphate guanylyltransferase [EC:2.7.7.13]
comp20329_c1_seq1	K12373	HEXA_B; hexosaminidase [EC:3.2.1.52]
comp25698_c0_seq1	K00849	galK; galactokinase [EC:2.7.1.6]
comp20329_c0_seq1	K12373	HEXA_B; hexosaminidase [EC:3.2.1.52]
comp25513_c0_seq1	K12450	RHM; UDP-glucose 4,6-dehydratase [EC:4.2.1.76]
comp24420_c1_seq1	K00326	E1.6.2.2; cytochrome-b5 reductase [EC:1.6.2.2]
comp20866_c0_seq1	K01836	E5.4.2.3; phosphoacetylglucosamine mutase [EC:5.4.2.3]
comp15834_c0_seq1	K01711	gmd, GMDS; GDPmannose 4,6-dehydratase [EC:4.2.1.47]
comp20243_c0_seq1	K12446	E2.7.1.46; L-arabinokinase [EC:2.7.1.46]
comp10427_c0_seq1	K17497	PMM; phosphomannomutase [EC:5.4.2.8]
comp14251_c0_seq1	K00966	GMPP; mannose-1-phosphate guanylyltransferase [EC:2.7.7.13]
comp11770_c1_seq1	K01835	pgm; phosphoglucomutase [EC:5.4.2.2]
comp8386_c0_seq1	K08679	E5.1.3.6; UDP-glucuronate 4-epimerase [EC:5.1.3.6]
comp24165_c1_seq1	K00844	HK; hexokinase [EC:2.7.1.1]
comp26334_c0_seq1	K00770	E2.4.2.24; 1,4-beta-D-xylan synthase [EC:2.4.2.24]
comp32088_c0_seq1	K12448	UXE; UDP-arabinose 4-epimerase [EC:5.1.3.5]
comp21451_c1_seq2	K16190	GLCAK; glucuronokinase [EC:2.7.1.43]
comp23556_c0_seq2	K13648	GAUT; alpha-1,4-galacturonosyltransferase [EC:2.4.1.43]
comp21178_c0_seq1	K13648	GAUT; alpha-1,4-galacturonosyltransferase [EC:2.4.1.43]
comp27901_c0_seq1	K12451	UER1; 3,5-epimerase/4-reductase [EC:5.1.3.- 1.1.1.-]
comp16240_c1_seq1	K13648	GAUT; alpha-1,4-galacturonosyltransferase [EC:2.4.1.43]
comp21109_c0_seq1	K13648	GAUT; alpha-1,4-galacturonosyltransferase [EC:2.4.1.43]
comp22022_c0_seq10	K12447	USP; UDP-sugar pyrophosphorylase [EC:2.7.7.64]
comp23073_c0_seq1	K00963	UGP2, galU, galF; UTP--glucose-1-phosphate uridylyltransferase [EC:2.7.7.9]
comp18333_c0_seq1	K00012	UGDH, ugd; UDPglucose 6-dehydrogenase [EC:1.1.1.22]
comp13173_c0_seq2	K12373	HEXA_B; hexosaminidase [EC:3.2.1.52]
comp20852_c0_seq1	K01209	E3.2.1.55, abfA; alpha-N-arabinofuranosidase [EC:3.2.1.55]
comp10265_c0_seq1	K00847	E2.7.1.4, scrK; fructokinase [EC:2.7.1.4]
comp13277_c0_seq1	K06118	E3.13.1.1, sqd1, sqdb; UDP-sulfoquinovose synthase [EC:3.13.1.1]
comp23685_c0_seq1	K10046	GME; GDP-D-mannose 3', 5'-epimerase [EC:5.1.3.18 5.1.3.-]
comp28014_c0_seq1	K00975	glgC; glucose-1-phosphate adenylyltransferase [EC:2.7.7.27]
comp25584_c0_seq15	K01835	pgm; phosphoglucomutase [EC:5.4.2.2]
comp15467_c0_seq1	K00844	HK; hexokinase [EC:2.7.1.1]
comp25793_c0_seq8	K00790	murA; UDP-N-acetylglucosamine 1-carboxyvinyltransferase [EC:2.5.1.7]
comp12875_c0_seq1	K00326	E1.6.2.2; cytochrome-b5 reductase [EC:1.6.2.2]
comp24411_c0_seq1	K13648	GAUT; alpha-1,4-galacturonosyltransferase [EC:2.4.1.43]
comp17509_c0_seq2	K00075	murB; UDP-N-acetylmuramate dehydrogenase [EC:1.3.1.98]
comp20470_c0_seq1	K15920	XYL4; beta-D-xylosidase 4 [EC:3.2.1.37]
comp19439_c1_seq2	K13648	GAUT; alpha-1,4-galacturonosyltransferase [EC:2.4.1.43]
comp20245_c0_seq1	K08679	E5.1.3.6; UDP-glucuronate 4-epimerase [EC:5.1.3.6]
comp19420_c0_seq4	K05305	FUK; fucokinase [EC:2.7.1.52]
comp12011_c0_seq1	K01810	GPI, pgi; glucose-6-phosphate isomerase [EC:5.3.1.9]
comp25723_c1_seq17	K00849	galK; galactokinase [EC:2.7.1.6]
comp11770_c1_seq1	K01835	pgm; phosphoglucomutase [EC:5.4.2.2]
comp24165_c1_seq1	K00844	HK; hexokinase [EC:2.7.1.1]
comp23110_c0_seq2	K01092	E3.1.3.25, IMPA, suhB; myo-inositol-1(or 4)-monophosphatase [EC:3.1.3.25]
comp25584_c0_seq15	K01835	pgm; phosphoglucomutase [EC:5.4.2.2]
comp15467_c0_seq1	K00844	HK; hexokinase [EC:2.7.1.1]
comp27043_c0_seq1	K01858	E5.5.1.4, INO1; myo-inositol-1-phosphate synthase [EC:5.5.1.4]
comp27901_c0_seq1	K12451	UER1; 3,5-epimerase/4-reductase [EC:5.1.3.- 1.1.1.-]
comp24165_c1_seq1	K00844	HK; hexokinase [EC:2.7.1.1]
comp15467_c0_seq1	K00844	HK; hexokinase [EC:2.7.1.1]
comp26201_c0_seq1	K12309	GLB1, ELNR1; beta-galactosidase [EC:3.2.1.23]
comp20329_c1_seq1	K12373	HEXA_B; hexosaminidase [EC:3.2.1.52]
comp20329_c0_seq1	K12373	HEXA_B; hexosaminidase [EC:3.2.1.52]
comp124325_c0_seq1	K10532	HGSNAT; heparan-alpha-glucosaminide N-acetyltransferase [EC:2.3.1.78]
comp11344_c0_seq1	K01205	NAGLU; alpha-N-acetylglucosaminidase [EC:3.2.1.50]
comp13173_c0_seq2	K12373	HEXA_B; hexosaminidase [EC:3.2.1.52]
comp22132_c0_seq1	K00734	B3GALT6; galactosylxylosylprotein 3-beta-galactosyltransferase [EC:2.4.1.134]
comp22132_c0_seq1	K00734	B3GALT6; galactosylxylosylprotein 3-beta-galactosyltransferase [EC:2.4.1.134]
comp16940_c0_seq5	K02535	lpxC; UDP-3-O-[3-hydroxymyristoyl] N-acetylglucosamine deacetylase [EC:3.5.1.108]
comp22263_c0_seq22	K00748	lpxB; lipid-A-disaccharide synthase [EC:2.4.1.182]
comp24488_c0_seq11	K02527	kdtA, waaA; 3-deoxy-D-manno-octulosonic-acid transferase [EC:2.4.99.12 2.4.99.13 2.4.99.14 2.4.99.15]
comp16189_c0_seq1	K00979	kdsB; 3-deoxy-manno-octulosonate cytidylyltransferase (CMP-KDO synthetase) [EC:2.7.7.38]
comp18612_c0_seq1	K01627	kdsA; 2-dehydro-3-deoxyphosphooctonate aldolase (KDO 8-P synthase) [EC:2.5.1.55]
comp23982_c1_seq7	K02563	murG; UDP-N-acetylglucosamine--N-acetylmuramyl-(pentapeptide) pyrophosphoryl-undecaprenol N-acetylglucosamine transferase [EC:2.4.1.227]
comp140318_c0_seq1	K01924	murC; UDP-N-acetylmuramate--alanine ligase [EC:6.3.2.8]
comp23982_c0_seq1	K02563	murG; UDP-N-acetylglucosamine--N-acetylmuramyl-(pentapeptide) pyrophosphoryl-undecaprenol N-acetylglucosamine transferase [EC:2.4.1.227]
comp23104_c0_seq2	K01929	murF; UDP-N-acetylmuramoyl-tripeptide--D-alanyl-D-alanine ligase [EC:6.3.2.10]
comp25793_c0_seq8	K00790	murA; UDP-N-acetylglucosamine 1-carboxyvinyltransferase [EC:2.5.1.7]
comp17509_c0_seq2	K00075	murB; UDP-N-acetylmuramate dehydrogenase [EC:1.3.1.98]
comp32019_c0_seq1	K09480	E2.4.1.241; digalactosyldiacylglycerol synthase [EC:2.4.1.241]
comp18302_c0_seq1	K00128	E1.2.1.3; aldehyde dehydrogenase (NAD+) [EC:1.2.1.3]
comp22405_c0_seq2	K11155	DGAT1; diacylglycerol O-acyltransferase 1 [EC:2.3.1.20 2.3.1.75 2.3.1.76]
comp32218_c0_seq1	K13508	GPAT; glycerol-3-phosphate acyltransferase [EC:2.3.1.15]
comp25512_c1_seq9	K14085	ALDH7A1; aldehyde dehydrogenase family 7 member A1 [EC:1.2.1.31 1.2.1.8 1.2.1.3]
comp22561_c0_seq2	K07407	E3.2.1.22B, galA, rafA; alpha-galactosidase [EC:3.2.1.22]
comp25484_c2_seq1	K00864	E2.7.1.30, glpK; glycerol kinase [EC:2.7.1.30]
comp22372_c0_seq4	K00630	ATS1; glycerol-3-phosphate O-acyltransferase [EC:2.3.1.15]
comp27099_c0_seq1	K00128	E1.2.1.3; aldehyde dehydrogenase (NAD+) [EC:1.2.1.3]
comp25064_c0_seq3	K15918	GLYK; D-glycerate 3-kinase [EC:2.7.1.31]
comp23540_c0_seq1	K13523	AGPAT3_4; lysophosphatidic acid acyltransferase / lysophosphatidylinositol acyltransferase [EC:2.3.1.51 2.3.1.-]
comp23886_c0_seq12	K00655	plsC; 1-acyl-sn-glycerol-3-phosphate acyltransferase [EC:2.3.1.51]
comp28852_c0_seq1	K13519	LPT1, ALE1; lysophospholipid acyltransferase [EC:2.3.1.51 2.3.1.23 2.3.1.-]
comp13030_c0_seq1	K13506	GPAT3_4, AGPAT9, AGPAT6; glycerol-3-phosphate O-acyltransferase 3/4 [EC:2.3.1.15]
comp22916_c0_seq9	K15728	LPIN; phosphatidate phosphatase LPIN [EC:3.1.3.4]
comp19760_c0_seq4	K13513	LCLAT1, AGPAT8; lysocardiolipin and lysophospholipid acyltransferase [EC:2.3.1.- 2.3.1.51]
comp16901_c0_seq1	K00128	E1.2.1.3; aldehyde dehydrogenase (NAD+) [EC:1.2.1.3]
comp50898_c0_seq1	K13508	GPAT; glycerol-3-phosphate acyltransferase [EC:2.3.1.15]
comp20803_c0_seq2	K07407	E3.2.1.22B, galA, rafA; alpha-galactosidase [EC:3.2.1.22]
comp23964_c0_seq1	K13513	LCLAT1, AGPAT8; lysocardiolipin and lysophospholipid acyltransferase [EC:2.3.1.- 2.3.1.51]
comp25139_c0_seq1	K00679	E2.3.1.158; phospholipid:diacylglycerol acyltransferase [EC:2.3.1.158]
comp24381_c0_seq1	K15728	LPIN; phosphatidate phosphatase LPIN [EC:3.1.3.4]
comp13277_c0_seq1	K06118	E3.13.1.1, sqd1, sqdb; UDP-sulfoquinovose synthase [EC:3.13.1.1]
comp7130_c0_seq1	K13523	AGPAT3_4; lysophosphatidic acid acyltransferase / lysophosphatidylinositol acyltransferase [EC:2.3.1.51 2.3.1.-]
comp22514_c0_seq4	K06119	SQD2; sulfoquinovosyltransferase [EC:2.4.1.-]
comp16008_c1_seq5	K00901	E2.7.1.107, DGK, dgkA; diacylglycerol kinase (ATP dependent) [EC:2.7.1.107]
comp22049_c0_seq1	K14674	TGL4; TAG lipase / steryl ester hydrolase / phospholipase A2 / LPA acyltransferase [EC:3.1.1.3 3.1.1.13 3.1.1.4 2.3.1.51]
comp18280_c0_seq1	K03715	E2.4.1.46; 1,2-diacylglycerol 3-beta-galactosyltransferase [EC:2.4.1.46]
comp24314_c0_seq3	K00901	E2.7.1.107, DGK, dgkA; diacylglycerol kinase (ATP dependent) [EC:2.7.1.107]
comp11049_c0_seq1	K13508	GPAT; glycerol-3-phosphate acyltransferase [EC:2.3.1.15]
comp23394_c1_seq5	K03715	E2.4.1.46; 1,2-diacylglycerol 3-beta-galactosyltransferase [EC:2.4.1.46]
comp76210_c0_seq1	K00128	E1.2.1.3; aldehyde dehydrogenase (NAD+) [EC:1.2.1.3]
comp39982_c0_seq1	K00913	ITPK1; inositol-1,3,4-trisphosphate 5/6-kinase / inositol-tetrakisphosphate 1-kinase [EC:2.7.1.159 2.7.1.134]
comp30524_c0_seq1	K15422	SAL; 3'(2'), 5'-bisphosphate nucleotidase / inositol polyphosphate 1-phosphatase [EC:3.1.3.7 3.1.3.57]
comp18054_c0_seq1	K00999	CDIPT; CDP-diacylglycerol--inositol 3-phosphatidyltransferase [EC:2.7.8.11]
comp19241_c0_seq1	K00921	PIKFYVE, FAB1; 1-phosphatidylinositol-3-phosphate 5-kinase [EC:2.7.1.150]
comp23001_c0_seq2	K00889	E2.7.1.68, PIP5K; 1-phosphatidylinositol-4-phosphate 5-kinase [EC:2.7.1.68]
comp22567_c0_seq1	K01114	plcC; phospholipase C [EC:3.1.4.3]
comp19959_c0_seq1	K05857	PLCD; phosphatidylinositol phospholipase C, delta [EC:3.1.4.11]
comp16078_c0_seq1	K01803	TPI, tpiA; triosephosphate isomerase (TIM) [EC:5.3.1.1]
comp17722_c1_seq5	K05857	PLCD; phosphatidylinositol phospholipase C, delta [EC:3.1.4.11]
comp17178_c0_seq1	K00915	IPK2; 1D-myo-Inositol-tetrakisphosphate 5-kinase / inositol-polyphosphate multikinase [EC:2.7.1.140 2.7.1.151]
comp22191_c0_seq7	K00140	mmsA, iolA, ALDH6A1; malonate-semialdehyde dehydrogenase (acetylating) / methylmalonate-semialdehyde dehydrogenase [EC:1.2.1.18 1.2.1.27]
comp20863_c0_seq1	K01114	plcC; phospholipase C [EC:3.1.4.3]
comp189338_c0_seq1	K00469	MIOX; inositol oxygenase [EC:1.13.99.1]
comp23426_c0_seq1	K00921	PIKFYVE, FAB1; 1-phosphatidylinositol-3-phosphate 5-kinase [EC:2.7.1.150]
comp20887_c0_seq1	K10047	VTC4; inositol-phosphate phosphatase / L-galactose 1-phosphate phosphatase [EC:3.1.3.25 3.1.3.-]
comp20703_c1_seq3	K00921	PIKFYVE, FAB1; 1-phosphatidylinositol-3-phosphate 5-kinase [EC:2.7.1.150]
comp9923_c0_seq1	K05857	PLCD; phosphatidylinositol phospholipase C, delta [EC:3.1.4.11]
comp68578_c0_seq1	K00469	MIOX; inositol oxygenase [EC:1.13.99.1]
comp23110_c0_seq2	K01092	E3.1.3.25, IMPA, suhB; myo-inositol-1(or 4)-monophosphatase [EC:3.1.3.25]
comp30283_c0_seq1	K01114	plcC; phospholipase C [EC:3.1.4.3]
comp14796_c0_seq1	K00921	PIKFYVE, FAB1; 1-phosphatidylinositol-3-phosphate 5-kinase [EC:2.7.1.150]
comp14095_c0_seq2	K00888	PI4K; phosphatidylinositol 4-kinase [EC:2.7.1.67]
comp184254_c0_seq1	K01110	PTEN; phosphatidylinositol-3,4,5-trisphosphate 3-phosphatase and dual-specificity protein phosphatase PTEN [EC:3.1.3.16 3.1.3.48 3.1.3.67]
comp25960_c0_seq1	K00888	PI4K; phosphatidylinositol 4-kinase [EC:2.7.1.67]
comp15828_c0_seq2	K01110	PTEN; phosphatidylinositol-3,4,5-trisphosphate 3-phosphatase and dual-specificity protein phosphatase PTEN [EC:3.1.3.16 3.1.3.48 3.1.3.67]
comp82216_c0_seq1	K01116	PLCG1; phosphatidylinositol phospholipase C, gamma-1 [EC:3.1.4.11]
comp27247_c0_seq1	K01803	TPI, tpiA; triosephosphate isomerase (TIM) [EC:5.3.1.1]
comp23760_c0_seq1	K01114	plcC; phospholipase C [EC:3.1.4.3]
comp16927_c0_seq1	K00913	ITPK1; inositol-1,3,4-trisphosphate 5/6-kinase / inositol-tetrakisphosphate 1-kinase [EC:2.7.1.159 2.7.1.134]
comp19288_c0_seq12	K10572	IPPK; inositol-pentakisphosphate 2-kinase [EC:2.7.1.158]
comp26223_c0_seq20	K00914	PIK3C3, VPS34; phosphatidylinositol 3-kinase [EC:2.7.1.137]
comp33079_c0_seq1	K00889	E2.7.1.68, PIP5K; 1-phosphatidylinositol-4-phosphate 5-kinase [EC:2.7.1.68]
comp12388_c0_seq2	K00913	ITPK1; inositol-1,3,4-trisphosphate 5/6-kinase / inositol-tetrakisphosphate 1-kinase [EC:2.7.1.159 2.7.1.134]
comp12781_c0_seq1	K00889	E2.7.1.68, PIP5K; 1-phosphatidylinositol-4-phosphate 5-kinase [EC:2.7.1.68]
comp27043_c0_seq1	K01858	E5.5.1.4, INO1; myo-inositol-1-phosphate synthase [EC:5.5.1.4]
comp7054_c0_seq1	K05290	PIGK; phosphatidylinositol glycan, class K [EC:2.6.-.-]
comp12142_c0_seq2	K05287	PIGF; phosphatidylinositol glycan, class F [EC:2.7.-.-]
comp20172_c0_seq2	K03857	PIGA, GPI3; phosphatidylinositol glycan, class A [EC:2.4.1.198]
comp25742_c0_seq3	K07542	PIGV; phosphatidylinositol glycan, class V [EC:2.4.1.-]
comp19492_c0_seq2	K05286	PIGB; phosphatidylinositol glycan, class B [EC:2.4.1.-]
comp26250_c0_seq1	K05310	GPI7; ethanolaminephosphotransferase [EC:2.7.-.-]
comp21485_c0_seq2	K05283	PIGW; phosphatidylinositol glycan, class W [EC:2.3.-.-]
comp25322_c0_seq3	K05285	PIGN; phosphatidylinositol glycan, class N [EC:2.7.-.-]
comp18054_c0_seq1	K00999	CDIPT; CDP-diacylglycerol--inositol 3-phosphatidyltransferase [EC:2.7.8.11]
comp32218_c0_seq1	K13508	GPAT; glycerol-3-phosphate acyltransferase [EC:2.3.1.15]
comp19698_c0_seq1	K13511	TAZ; monolysocardiolipin acyltransferase [EC:2.3.1.-]
comp23584_c0_seq1	K00968	PCYT1; choline-phosphate cytidylyltransferase [EC:2.7.7.15]
comp22567_c0_seq1	K01114	plcC; phospholipase C [EC:3.1.4.3]
comp20365_c0_seq3	K13510	LPCAT1_2; lysophosphatidylcholine acyltransferase / lyso-PAF acetyltransferase [EC:2.3.1.23 2.3.1.67]
comp22452_c0_seq6	K00006	GPD1; glycerol-3-phosphate dehydrogenase (NAD+) [EC:1.1.1.8]
comp20863_c0_seq1	K01114	plcC; phospholipase C [EC:3.1.4.3]
comp22372_c0_seq4	K00630	ATS1; glycerol-3-phosphate O-acyltransferase [EC:2.3.1.15]
comp8051_c0_seq1	K06130	LYPLA2; lysophospholipase II [EC:3.1.1.5]
comp7491_c0_seq1	K13510	LPCAT1_2; lysophosphatidylcholine acyltransferase / lyso-PAF acetyltransferase [EC:2.3.1.23 2.3.1.67]
comp18621_c0_seq1	K00967	PCYT2; ethanolamine-phosphate cytidylyltransferase [EC:2.7.7.14]
comp7482_c0_seq1	K01115	PLD1_2; phospholipase D1/2 [EC:3.1.4.4]
comp23041_c0_seq1	K00111	glpA, glpD; glycerol-3-phosphate dehydrogenase [EC:1.1.5.3]
comp23540_c0_seq1	K13523	AGPAT3_4; lysophosphatidic acid acyltransferase / lysophosphatidylinositol acyltransferase [EC:2.3.1.51 2.3.1.-]
comp23886_c0_seq12	K00655	plsC; 1-acyl-sn-glycerol-3-phosphate acyltransferase [EC:2.3.1.51]
comp28852_c0_seq1	K13519	LPT1, ALE1; lysophospholipid acyltransferase [EC:2.3.1.51 2.3.1.23 2.3.1.-]
comp8032_c0_seq1	K00968	PCYT1; choline-phosphate cytidylyltransferase [EC:2.7.7.15]
comp69301_c0_seq1	K14156	CHK; choline/ethanolamine kinase [EC:2.7.1.32 2.7.1.82]
comp13030_c0_seq1	K13506	GPAT3_4, AGPAT9, AGPAT6; glycerol-3-phosphate O-acyltransferase 3/4 [EC:2.3.1.15]
comp22916_c0_seq9	K15728	LPIN; phosphatidate phosphatase LPIN [EC:3.1.3.4]
comp30283_c0_seq1	K01114	plcC; phospholipase C [EC:3.1.4.3]
comp24210_c0_seq1	K00967	PCYT2; ethanolamine-phosphate cytidylyltransferase [EC:2.7.7.14]
comp19873_c0_seq3	K01047	PLA2G, SPLA2; secretory phospholipase A2 [EC:3.1.1.4]
comp19760_c0_seq4	K13513	LCLAT1, AGPAT8; lysocardiolipin and lysophospholipid acyltransferase [EC:2.3.1.- 2.3.1.51]
comp24334_c0_seq23	K01613	psd, PISD; phosphatidylserine decarboxylase [EC:4.1.1.65]
comp50898_c0_seq1	K13508	GPAT; glycerol-3-phosphate acyltransferase [EC:2.3.1.15]
comp22798_c0_seq4	K08744	CRLS; cardiolipin synthase [EC:2.7.8.-]
comp23964_c0_seq1	K13513	LCLAT1, AGPAT8; lysocardiolipin and lysophospholipid acyltransferase [EC:2.3.1.- 2.3.1.51]
comp21815_c0_seq4	K16860	PLD3_4; phospholipase D3/4 [EC:3.1.4.4]
comp24381_c0_seq1	K15728	LPIN; phosphatidate phosphatase LPIN [EC:3.1.3.4]
comp23760_c0_seq1	K01114	plcC; phospholipase C [EC:3.1.4.3]
comp14636_c0_seq1	K01115	PLD1_2; phospholipase D1/2 [EC:3.1.4.4]
comp25866_c0_seq2	K00993	EPT1; ethanolaminephosphotransferase [EC:2.7.8.1]
comp12073_c0_seq1	K08730	PTDSS2; phosphatidylserine synthase 2 [EC:2.7.8.29]
comp7130_c0_seq1	K13523	AGPAT3_4; lysophosphatidic acid acyltransferase / lysophosphatidylinositol acyltransferase [EC:2.3.1.51 2.3.1.-]
comp6789_c0_seq1	K00550	OPI3; methylene-fatty-acyl-phospholipid synthase [EC:2.1.1.16]
comp16008_c1_seq5	K00901	E2.7.1.107, DGK, dgkA; diacylglycerol kinase (ATP dependent) [EC:2.7.1.107]
comp22049_c0_seq1	K14674	TGL4; TAG lipase / steryl ester hydrolase / phospholipase A2 / LPA acyltransferase [EC:3.1.1.3 3.1.1.13 3.1.1.4 2.3.1.51]
comp7243_c0_seq2	K05929	E2.1.1.103, NMT; phosphoethanolamine N-methyltransferase [EC:2.1.1.103]
comp24314_c0_seq3	K00901	E2.7.1.107, DGK, dgkA; diacylglycerol kinase (ATP dependent) [EC:2.7.1.107]
comp29042_c0_seq1	K06130	LYPLA2; lysophospholipase II [EC:3.1.1.5]
comp24030_c0_seq1	K00866	CKI1; choline kinase [EC:2.7.1.32]
comp11049_c0_seq1	K13508	GPAT; glycerol-3-phosphate acyltransferase [EC:2.3.1.15]
comp15201_c1_seq1	K00981	E2.7.7.41, CDS1, CDS2, cdsA; phosphatidate cytidylyltransferase [EC:2.7.7.41]
comp24621_c0_seq6	K01115	PLD1_2; phospholipase D1/2 [EC:3.1.4.4]
comp20441_c0_seq8	K13511	TAZ; monolysocardiolipin acyltransferase [EC:2.3.1.-]
comp16763_c0_seq2	K00894	ETNK, EKI; ethanolamine kinase [EC:2.7.1.82]
comp23207_c0_seq1	K01613	psd, PISD; phosphatidylserine decarboxylase [EC:4.1.1.65]
comp22567_c0_seq1	K01114	plcC; phospholipase C [EC:3.1.4.3]
comp20365_c0_seq3	K13510	LPCAT1_2; lysophosphatidylcholine acyltransferase / lyso-PAF acetyltransferase [EC:2.3.1.23 2.3.1.67]
comp20863_c0_seq1	K01114	plcC; phospholipase C [EC:3.1.4.3]
comp7491_c0_seq1	K13510	LPCAT1_2; lysophosphatidylcholine acyltransferase / lyso-PAF acetyltransferase [EC:2.3.1.23 2.3.1.67]
comp7482_c0_seq1	K01115	PLD1_2; phospholipase D1/2 [EC:3.1.4.4]
comp28852_c0_seq1	K13519	LPT1, ALE1; lysophospholipid acyltransferase [EC:2.3.1.51 2.3.1.23 2.3.1.-]
comp30283_c0_seq1	K01114	plcC; phospholipase C [EC:3.1.4.3]
comp19873_c0_seq3	K01047	PLA2G, SPLA2; secretory phospholipase A2 [EC:3.1.1.4]
comp21815_c0_seq4	K16860	PLD3_4; phospholipase D3/4 [EC:3.1.4.4]
comp23760_c0_seq1	K01114	plcC; phospholipase C [EC:3.1.4.3]
comp14636_c0_seq1	K01115	PLD1_2; phospholipase D1/2 [EC:3.1.4.4]
comp25866_c0_seq2	K00993	EPT1; ethanolaminephosphotransferase [EC:2.7.8.1]
comp22049_c0_seq1	K14674	TGL4; TAG lipase / steryl ester hydrolase / phospholipase A2 / LPA acyltransferase [EC:3.1.1.3 3.1.1.13 3.1.1.4 2.3.1.51]
comp24621_c0_seq6	K01115	PLD1_2; phospholipase D1/2 [EC:3.1.4.4]
comp8227_c0_seq1	K00432	E1.11.1.9; glutathione peroxidase [EC:1.11.1.9]
comp28239_c0_seq1	K00432	E1.11.1.9; glutathione peroxidase [EC:1.11.1.9]
comp7953_c0_seq1	K00432	E1.11.1.9; glutathione peroxidase [EC:1.11.1.9]
comp8129_c0_seq1	K01254	LTA4H; leukotriene-A4 hydrolase [EC:3.3.2.6]
comp19873_c0_seq3	K01047	PLA2G, SPLA2; secretory phospholipase A2 [EC:3.1.1.4]
comp23675_c0_seq1	K00432	E1.11.1.9; glutathione peroxidase [EC:1.11.1.9]
comp22934_c0_seq1	K00681	ggt; gamma-glutamyltranspeptidase [EC:2.3.2.2]
comp27244_c0_seq1	K15730	PTGES3; cytosolic prostaglandin-E synthase [EC:5.3.99.3]
comp24017_c0_seq2	K00432	E1.11.1.9; glutathione peroxidase [EC:1.11.1.9]
comp81819_c0_seq1	K08021	ALOX12B; arachidonate 12-lipoxygenase (R-type) [EC:1.13.11.-]
comp22049_c0_seq1	K14674	TGL4; TAG lipase / steryl ester hydrolase / phospholipase A2 / LPA acyltransferase [EC:3.1.1.3 3.1.1.13 3.1.1.4 2.3.1.51]
comp21747_c0_seq6	K05309	PTGES2; microsomal prostaglandin-E synthase 2 [EC:5.3.99.3]
comp25277_c0_seq1	K07418	CYP2J; cytochrome P450, family 2, subfamily J [EC:1.14.14.1]
comp23010_c0_seq1	K00454	LOX2S; lipoxygenase [EC:1.13.11.12]
comp19873_c0_seq3	K01047	PLA2G, SPLA2; secretory phospholipase A2 [EC:3.1.1.4]
comp24050_c0_seq1	K00454	LOX2S; lipoxygenase [EC:1.13.11.12]
comp24306_c0_seq1	K00454	LOX2S; lipoxygenase [EC:1.13.11.12]
comp22067_c0_seq1	K15718	LOX1_5; linoleate 9S-lipoxygenase [EC:1.13.11.58]
comp22049_c0_seq1	K14674	TGL4; TAG lipase / steryl ester hydrolase / phospholipase A2 / LPA acyltransferase [EC:3.1.1.3 3.1.1.13 3.1.1.4 2.3.1.51]
comp25277_c0_seq1	K07418	CYP2J; cytochrome P450, family 2, subfamily J [EC:1.14.14.1]
comp21327_c0_seq1	K10525	E5.3.99.6, aoc; allene oxide cyclase [EC:5.3.99.6]
comp23010_c0_seq1	K00454	LOX2S; lipoxygenase [EC:1.13.11.12]
comp25699_c0_seq1	K10526	OPCL1; OPC-8:0 CoA ligase 1 [EC:6.2.1.-]
comp25787_c0_seq15	K05894	E1.3.1.42; 12-oxophytodienoic acid reductase [EC:1.3.1.42]
comp22102_c0_seq1	K00232	E1.3.3.6, ACOX1, ACOX3; acyl-CoA oxidase [EC:1.3.3.6]
comp15655_c0_seq1	K10527	MFP2; enoyl-CoA hydratase/3-hydroxyacyl-CoA dehydrogenase [EC:4.2.1.17 1.1.1.35 1.1.1.211]
comp16100_c0_seq1	K07513	ACAA1; acetyl-CoA acyltransferase 1 [EC:2.3.1.16]
comp18462_c0_seq2	K10528	HPL; hydroperoxide lyase [EC:4.1.2.-]
comp18038_c0_seq1	K10527	MFP2; enoyl-CoA hydratase/3-hydroxyacyl-CoA dehydrogenase [EC:4.2.1.17 1.1.1.35 1.1.1.211]
comp19873_c0_seq3	K01047	PLA2G, SPLA2; secretory phospholipase A2 [EC:3.1.1.4]
comp24815_c1_seq1	K00232	E1.3.3.6, ACOX1, ACOX3; acyl-CoA oxidase [EC:1.3.3.6]
comp30125_c0_seq1	K00232	E1.3.3.6, ACOX1, ACOX3; acyl-CoA oxidase [EC:1.3.3.6]
comp24050_c0_seq1	K00454	LOX2S; lipoxygenase [EC:1.13.11.12]
comp24306_c0_seq1	K00454	LOX2S; lipoxygenase [EC:1.13.11.12]
comp19238_c0_seq1	K00232	E1.3.3.6, ACOX1, ACOX3; acyl-CoA oxidase [EC:1.3.3.6]
comp27992_c0_seq1	K01723	AOS; hydroperoxide dehydratase [EC:4.2.1.92]
comp22049_c0_seq1	K14674	TGL4; TAG lipase / steryl ester hydrolase / phospholipase A2 / LPA acyltransferase [EC:3.1.1.3 3.1.1.13 3.1.1.4 2.3.1.51]
comp22561_c0_seq2	K07407	E3.2.1.22B, galA, rafA; alpha-galactosidase [EC:3.2.1.22]
comp26201_c0_seq1	K12309	GLB1, ELNR1; beta-galactosidase [EC:3.2.1.23]
comp12809_c0_seq1	K04708	E1.1.1.102; 3-dehydrosphinganine reductase [EC:1.1.1.102]
comp18760_c0_seq8	K04715	E2.7.1.138, CERK; ceramide kinase [EC:2.7.1.138]
comp23974_c0_seq4	K00654	E2.3.1.50; serine palmitoyltransferase [EC:2.3.1.50]
comp6761_c0_seq1	K12349	ASAH2; neutral ceramidase [EC:3.5.1.23]
comp7178_c0_seq1	K00654	E2.3.1.50; serine palmitoyltransferase [EC:2.3.1.50]
comp33696_c0_seq1	K04713	SUR2; sphinganine C4-monooxygenase [EC:1.14.13.169]
comp20803_c0_seq2	K07407	E3.2.1.22B, galA, rafA; alpha-galactosidase [EC:3.2.1.22]
comp26348_c0_seq50	K17108	GBA2; non-lysosomal glucosylceramidase [EC:3.2.1.45]
comp24243_c0_seq1	K12349	ASAH2; neutral ceramidase [EC:3.5.1.23]
comp20590_c1_seq2	K04711	YDC1; dihydroceramidase [EC:3.5.1.-]
comp7532_c0_seq1	K01190	lacZ; beta-galactosidase [EC:3.2.1.23]
comp26305_c0_seq14	K17108	GBA2; non-lysosomal glucosylceramidase [EC:3.2.1.45]
comp90151_c0_seq1	K01988	A4GALT; lactosylceramide 4-alpha-galactosyltransferase [EC:2.4.1.228]
comp22413_c0_seq2	K01988	A4GALT; lactosylceramide 4-alpha-galactosyltransferase [EC:2.4.1.228]
comp22561_c0_seq2	K07407	E3.2.1.22B, galA, rafA; alpha-galactosidase [EC:3.2.1.22]
comp20329_c1_seq1	K12373	HEXA_B; hexosaminidase [EC:3.2.1.52]
comp20329_c0_seq1	K12373	HEXA_B; hexosaminidase [EC:3.2.1.52]
comp20803_c0_seq2	K07407	E3.2.1.22B, galA, rafA; alpha-galactosidase [EC:3.2.1.22]
comp13173_c0_seq2	K12373	HEXA_B; hexosaminidase [EC:3.2.1.52]
comp26201_c0_seq1	K12309	GLB1, ELNR1; beta-galactosidase [EC:3.2.1.23]
comp20329_c1_seq1	K12373	HEXA_B; hexosaminidase [EC:3.2.1.52]
comp20329_c0_seq1	K12373	HEXA_B; hexosaminidase [EC:3.2.1.52]
comp13173_c0_seq2	K12373	HEXA_B; hexosaminidase [EC:3.2.1.52]
comp24838_c0_seq1	K01962	accA; acetyl-CoA carboxylase carboxyl transferase subunit alpha [EC:6.4.1.2]
comp13611_c0_seq1	K01759	E4.4.1.5, GLO1, gloA; lactoylglutathione lyase [EC:4.4.1.5]
comp12034_c0_seq1	K00626	E2.3.1.9, atoB; acetyl-CoA C-acetyltransferase [EC:2.3.1.9]
comp18302_c0_seq1	K00128	E1.2.1.3; aldehyde dehydrogenase (NAD+) [EC:1.2.1.3]
comp7089_c0_seq1	K00026	MDH2; malate dehydrogenase [EC:1.1.1.37]
comp15932_c0_seq1	K01759	E4.4.1.5, GLO1, gloA; lactoylglutathione lyase [EC:4.4.1.5]
comp20616_c0_seq1	K00026	MDH2; malate dehydrogenase [EC:1.1.1.37]
comp25512_c1_seq9	K14085	ALDH7A1; aldehyde dehydrogenase family 7 member A1 [EC:1.2.1.31 1.2.1.8 1.2.1.3]
comp24148_c0_seq3	K00873	PK, pyk; pyruvate kinase [EC:2.7.1.40]
comp15882_c0_seq1	K00029	E1.1.1.40, maeB; malate dehydrogenase (oxaloacetate-decarboxylating)(NADP+) [EC:1.1.1.40]
comp13307_c0_seq1	K01895	ACSS, acs; acetyl-CoA synthetase [EC:6.2.1.1]
comp10198_c0_seq1	K01069	E3.1.2.6, gloB; hydroxyacylglutathione hydrolase [EC:3.1.2.6]
comp26159_c1_seq2	K01649	leuA; 2-isopropylmalate synthase [EC:2.3.3.13]
comp24526_c0_seq3	K00873	PK, pyk; pyruvate kinase [EC:2.7.1.40]
comp22127_c0_seq3	K01610	E4.1.1.49, pckA; phosphoenolpyruvate carboxykinase (ATP) [EC:4.1.1.49]
comp24849_c0_seq1	K00162	PDHB, pdhB; pyruvate dehydrogenase E1 component subunit beta [EC:1.2.4.1]
comp15830_c0_seq1	K00161	PDHA, pdhA; pyruvate dehydrogenase E1 component subunit alpha [EC:1.2.4.1]
comp7335_c0_seq2	K00016	LDH, ldh; L-lactate dehydrogenase [EC:1.1.1.27]
comp27099_c0_seq1	K00128	E1.2.1.3; aldehyde dehydrogenase (NAD+) [EC:1.2.1.3]
comp24308_c0_seq3	K01512	acyP; acylphosphatase [EC:3.6.1.7]
comp20225_c0_seq3	K00873	PK, pyk; pyruvate kinase [EC:2.7.1.40]
comp6786_c0_seq2	K00873	PK, pyk; pyruvate kinase [EC:2.7.1.40]
comp18178_c0_seq1	K00873	PK, pyk; pyruvate kinase [EC:2.7.1.40]
comp25103_c1_seq10	K00627	DLAT, aceF, pdhC; pyruvate dehydrogenase E2 component (dihydrolipoamide acetyltransferase) [EC:2.3.1.12]
comp9856_c0_seq2	K01759	E4.4.1.5, GLO1, gloA; lactoylglutathione lyase [EC:4.4.1.5]
comp23096_c1_seq1	K00161	PDHA, pdhA; pyruvate dehydrogenase E1 component subunit alpha [EC:1.2.4.1]
comp19849_c0_seq2	K00026	MDH2; malate dehydrogenase [EC:1.1.1.37]
comp13201_c0_seq1	K01069	E3.1.2.6, gloB; hydroxyacylglutathione hydrolase [EC:3.1.2.6]
comp13007_c0_seq1	K00873	PK, pyk; pyruvate kinase [EC:2.7.1.40]
comp16901_c0_seq1	K00128	E1.2.1.3; aldehyde dehydrogenase (NAD+) [EC:1.2.1.3]
comp29752_c0_seq1	K00627	DLAT, aceF, pdhC; pyruvate dehydrogenase E2 component (dihydrolipoamide acetyltransferase) [EC:2.3.1.12]
comp23510_c0_seq11	K01759	E4.4.1.5, GLO1, gloA; lactoylglutathione lyase [EC:4.4.1.5]
comp18840_c0_seq1	K00028	E1.1.1.39; malate dehydrogenase (decarboxylating) [EC:1.1.1.39]
comp22253_c0_seq1	K00873	PK, pyk; pyruvate kinase [EC:2.7.1.40]
comp16617_c0_seq5	K01962	accA; acetyl-CoA carboxylase carboxyl transferase subunit alpha [EC:6.4.1.2]
comp13410_c0_seq1	K00026	MDH2; malate dehydrogenase [EC:1.1.1.37]
comp14689_c0_seq1	K00873	PK, pyk; pyruvate kinase [EC:2.7.1.40]
comp24919_c5_seq13	K11262	ACAC; acetyl-CoA carboxylase / biotin carboxylase [EC:6.4.1.2 6.3.4.14]
comp8131_c0_seq1	K00028	E1.1.1.39; malate dehydrogenase (decarboxylating) [EC:1.1.1.39]
comp15312_c0_seq4	K01638	E2.3.3.9, aceB, glcB; malate synthase [EC:2.3.3.9]
comp13970_c0_seq1	K01961	accC; acetyl-CoA carboxylase, biotin carboxylase subunit [EC:6.4.1.2 6.3.4.14]
comp15960_c0_seq1	K00382	DLD, lpd, pdhD; dihydrolipoamide dehydrogenase [EC:1.8.1.4]
comp25014_c0_seq1	K00382	DLD, lpd, pdhD; dihydrolipoamide dehydrogenase [EC:1.8.1.4]
comp19532_c0_seq2	K01595	ppc; phosphoenolpyruvate carboxylase [EC:4.1.1.31]
comp7365_c0_seq1	K00025	MDH1; malate dehydrogenase [EC:1.1.1.37]
comp20943_c0_seq1	K01595	ppc; phosphoenolpyruvate carboxylase [EC:4.1.1.31]
comp18552_c0_seq1	K00162	PDHB, pdhB; pyruvate dehydrogenase E1 component subunit beta [EC:1.2.4.1]
comp21298_c0_seq1	K00162	PDHB, pdhB; pyruvate dehydrogenase E1 component subunit beta [EC:1.2.4.1]
comp76210_c0_seq1	K00128	E1.2.1.3; aldehyde dehydrogenase (NAD+) [EC:1.2.1.3]
comp7251_c0_seq1	K01061	E3.1.1.45; carboxymethylenebutenolidase [EC:3.1.1.45]
comp21286_c0_seq1	K00517	E1.14.-.-; [EC:1.14.-.-]
comp24400_c0_seq1	K00599	E2.1.1.-; [EC:2.1.1.-]
comp6491_c0_seq1	K00517	E1.14.-.-; [EC:1.14.-.-]
comp16201_c0_seq1	K00517	E1.14.-.-; [EC:1.14.-.-]
comp17697_c0_seq1	K00517	E1.14.-.-; [EC:1.14.-.-]
comp78794_c0_seq1	K00517	E1.14.-.-; [EC:1.14.-.-]
comp17908_c0_seq1	K00599	E2.1.1.-; [EC:2.1.1.-]
comp21090_c0_seq1	K00517	E1.14.-.-; [EC:1.14.-.-]
comp30843_c0_seq1	K00517	E1.14.-.-; [EC:1.14.-.-]
comp24375_c0_seq18	K00599	E2.1.1.-; [EC:2.1.1.-]
comp59123_c0_seq1	K00224	E1.3.1.-; [EC:1.3.1.-]
comp63643_c0_seq1	K00517	E1.14.-.-; [EC:1.14.-.-]
comp18302_c0_seq1	K00128	E1.2.1.3; aldehyde dehydrogenase (NAD+) [EC:1.2.1.3]
comp16013_c0_seq1	K00121	frmA, ADH5, adhC; S-(hydroxymethyl)glutathione dehydrogenase / alcohol dehydrogenase [EC:1.1.1.284 1.1.1.1]
comp27099_c0_seq1	K00128	E1.2.1.3; aldehyde dehydrogenase (NAD+) [EC:1.2.1.3]
comp11450_c0_seq1	K00001	E1.1.1.1, adh; alcohol dehydrogenase [EC:1.1.1.1]
comp16901_c0_seq1	K00128	E1.2.1.3; aldehyde dehydrogenase (NAD+) [EC:1.2.1.3]
comp27876_c0_seq1	K00121	frmA, ADH5, adhC; S-(hydroxymethyl)glutathione dehydrogenase / alcohol dehydrogenase [EC:1.1.1.284 1.1.1.1]
comp6848_c0_seq1	K00001	E1.1.1.1, adh; alcohol dehydrogenase [EC:1.1.1.1]
comp573_c0_seq2	K00121	frmA, ADH5, adhC; S-(hydroxymethyl)glutathione dehydrogenase / alcohol dehydrogenase [EC:1.1.1.284 1.1.1.1]
comp76210_c0_seq1	K00128	E1.2.1.3; aldehyde dehydrogenase (NAD+) [EC:1.2.1.3]
comp16013_c0_seq1	K00121	frmA, ADH5, adhC; S-(hydroxymethyl)glutathione dehydrogenase / alcohol dehydrogenase [EC:1.1.1.284 1.1.1.1]
comp11450_c0_seq1	K00001	E1.1.1.1, adh; alcohol dehydrogenase [EC:1.1.1.1]
comp27876_c0_seq1	K00121	frmA, ADH5, adhC; S-(hydroxymethyl)glutathione dehydrogenase / alcohol dehydrogenase [EC:1.1.1.284 1.1.1.1]
comp6848_c0_seq1	K00001	E1.1.1.1, adh; alcohol dehydrogenase [EC:1.1.1.1]
comp573_c0_seq2	K00121	frmA, ADH5, adhC; S-(hydroxymethyl)glutathione dehydrogenase / alcohol dehydrogenase [EC:1.1.1.284 1.1.1.1]
comp21286_c0_seq1	K00517	E1.14.-.-; [EC:1.14.-.-]
comp6491_c0_seq1	K00517	E1.14.-.-; [EC:1.14.-.-]
comp16201_c0_seq1	K00517	E1.14.-.-; [EC:1.14.-.-]
comp16841_c0_seq2	K01113	phoD; alkaline phosphatase D [EC:3.1.3.1]
comp17697_c0_seq1	K00517	E1.14.-.-; [EC:1.14.-.-]
comp78794_c0_seq1	K00517	E1.14.-.-; [EC:1.14.-.-]
comp24308_c0_seq3	K01512	acyP; acylphosphatase [EC:3.6.1.7]
comp21090_c0_seq1	K00517	E1.14.-.-; [EC:1.14.-.-]
comp30843_c0_seq1	K00517	E1.14.-.-; [EC:1.14.-.-]
comp63643_c0_seq1	K00517	E1.14.-.-; [EC:1.14.-.-]
comp25101_c0_seq8	K00284	E1.4.7.1; glutamate synthase (ferredoxin) [EC:1.4.7.1]
comp12034_c0_seq1	K00626	E2.3.1.9, atoB; acetyl-CoA C-acetyltransferase [EC:2.3.1.9]
comp7589_c0_seq1	K00600	glyA, SHMT; glycine hydroxymethyltransferase [EC:2.1.2.1]
comp7089_c0_seq1	K00026	MDH2; malate dehydrogenase [EC:1.1.1.37]
comp22703_c0_seq1	K01681	ACO, acnA; aconitate hydratase [EC:4.2.1.3]
comp11794_c0_seq1	K01915	glnA; glutamine synthetase [EC:6.3.1.2]
comp15968_c0_seq1	K07130	kynB; arylformamidase [EC:3.5.1.9]
comp20616_c0_seq1	K00026	MDH2; malate dehydrogenase [EC:1.1.1.37]
comp14509_c1_seq2	K00600	glyA, SHMT; glycine hydroxymethyltransferase [EC:2.1.2.1]
comp23659_c0_seq8	K11517	HAO; (S)-2-hydroxy-acid oxidase [EC:1.1.3.15]
comp26324_c1_seq20	K00600	glyA, SHMT; glycine hydroxymethyltransferase [EC:2.1.2.1]
comp28543_c0_seq1	K01602	rbcS; ribulose-bisphosphate carboxylase small chain [EC:4.1.1.39]
comp33142_c0_seq1	K01647	CS, gltA; citrate synthase [EC:2.3.3.1]
comp30139_c0_seq1	K00600	glyA, SHMT; glycine hydroxymethyltransferase [EC:2.1.2.1]
comp25064_c0_seq3	K15918	GLYK; D-glycerate 3-kinase [EC:2.7.1.31]
comp20682_c0_seq1	K01681	ACO, acnA; aconitate hydratase [EC:4.2.1.3]
comp26920_c0_seq1	K00122	FDH; formate dehydrogenase [EC:1.2.1.2]
comp6332_c0_seq1	K00042	E1.1.1.60, garR; 2-hydroxy-3-oxopropionate reductase [EC:1.1.1.60]
comp19849_c0_seq2	K00026	MDH2; malate dehydrogenase [EC:1.1.1.37]
comp15510_c0_seq2	K14272	GGAT; glutamate--glyoxylate aminotransferase [EC:2.6.1.4 2.6.1.2 2.6.1.44 2.6.1.-]
comp21233_c0_seq2	K03781	katE, CAT, catB, srpA; catalase [EC:1.11.1.6]
comp13410_c0_seq1	K00026	MDH2; malate dehydrogenase [EC:1.1.1.37]
comp18165_c1_seq1	K01433	purU; formyltetrahydrofolate deformylase [EC:3.5.1.10]
comp15312_c0_seq4	K01638	E2.3.3.9, aceB, glcB; malate synthase [EC:2.3.3.9]
comp22259_c0_seq3	K01647	CS, gltA; citrate synthase [EC:2.3.3.1]
comp22843_c0_seq2	K11517	HAO; (S)-2-hydroxy-acid oxidase [EC:1.1.3.15]
comp39036_c0_seq1	K01091	E3.1.3.18, gph; phosphoglycolate phosphatase [EC:3.1.3.18]
comp20523_c0_seq1	K01602	rbcS; ribulose-bisphosphate carboxylase small chain [EC:4.1.1.39]
comp7365_c0_seq1	K00025	MDH1; malate dehydrogenase [EC:1.1.1.37]
comp23837_c0_seq7	K01455	E3.5.1.49; formamidase [EC:3.5.1.49]
comp25405_c1_seq1	K00600	glyA, SHMT; glycine hydroxymethyltransferase [EC:2.1.2.1]
comp24838_c0_seq1	K01962	accA; acetyl-CoA carboxylase carboxyl transferase subunit alpha [EC:6.4.1.2]
comp12034_c0_seq1	K00626	E2.3.1.9, atoB; acetyl-CoA C-acetyltransferase [EC:2.3.1.9]
comp18302_c0_seq1	K00128	E1.2.1.3; aldehyde dehydrogenase (NAD+) [EC:1.2.1.3]
comp7135_c0_seq1	K05605	HIBCH; 3-hydroxyisobutyryl-CoA hydrolase [EC:3.1.2.4]
comp25512_c1_seq9	K14085	ALDH7A1; aldehyde dehydrogenase family 7 member A1 [EC:1.2.1.31 1.2.1.8 1.2.1.3]
comp23848_c0_seq2	K01578	E4.1.1.9, MLYCD; malonyl-CoA decarboxylase [EC:4.1.1.9]
comp13307_c0_seq1	K01895	ACSS, acs; acetyl-CoA synthetase [EC:6.2.1.1]
comp22191_c0_seq7	K00140	mmsA, iolA, ALDH6A1; malonate-semialdehyde dehydrogenase (acetylating) / methylmalonate-semialdehyde dehydrogenase [EC:1.2.1.18 1.2.1.27]
comp7335_c0_seq2	K00016	LDH, ldh; L-lactate dehydrogenase [EC:1.1.1.27]
comp27099_c0_seq1	K00128	E1.2.1.3; aldehyde dehydrogenase (NAD+) [EC:1.2.1.3]
comp23956_c0_seq4	K05605	HIBCH; 3-hydroxyisobutyryl-CoA hydrolase [EC:3.1.2.4]
comp16901_c0_seq1	K00128	E1.2.1.3; aldehyde dehydrogenase (NAD+) [EC:1.2.1.3]
comp21559_c0_seq1	K05605	HIBCH; 3-hydroxyisobutyryl-CoA hydrolase [EC:3.1.2.4]
comp7114_c1_seq1	K01900	LSC2; succinyl-CoA synthetase beta subunit [EC:6.2.1.4 6.2.1.5]
comp24999_c0_seq1	K00249	ACADM, acd; acyl-CoA dehydrogenase [EC:1.3.8.7]
comp16617_c0_seq5	K01962	accA; acetyl-CoA carboxylase carboxyl transferase subunit alpha [EC:6.4.1.2]
comp24919_c5_seq13	K11262	ACAC; acetyl-CoA carboxylase / biotin carboxylase [EC:6.4.1.2 6.3.4.14]
comp7244_c0_seq1	K01899	LSC1; succinyl-CoA synthetase alpha subunit [EC:6.2.1.4 6.2.1.5]
comp13970_c0_seq1	K01961	accC; acetyl-CoA carboxylase, biotin carboxylase subunit [EC:6.4.1.2 6.3.4.14]
comp76210_c0_seq1	K00128	E1.2.1.3; aldehyde dehydrogenase (NAD+) [EC:1.2.1.3]
comp25599_c0_seq2	K01800	maiA, GSTZ1; maleylacetoacetate isomerase [EC:5.2.1.2]
comp24606_c0_seq19	K00451	HGD, hmgA; homogentisate 1,2-dioxygenase [EC:1.13.11.5]
comp18023_c0_seq1	K01555	FAH, fahA; fumarylacetoacetase [EC:3.7.1.2]
comp12034_c0_seq1	K00626	E2.3.1.9, atoB; acetyl-CoA C-acetyltransferase [EC:2.3.1.9]
comp24357_c0_seq1	K01580	E4.1.1.15, gadB, gadA, GAD; glutamate decarboxylase [EC:4.1.1.15]
comp24849_c0_seq1	K00162	PDHB, pdhB; pyruvate dehydrogenase E1 component subunit beta [EC:1.2.4.1]
comp15830_c0_seq1	K00161	PDHA, pdhA; pyruvate dehydrogenase E1 component subunit alpha [EC:1.2.4.1]
comp22162_c0_seq2	K01640	E4.1.3.4, HMGCL, hmgL; hydroxymethylglutaryl-CoA lyase [EC:4.1.3.4]
comp23096_c1_seq1	K00161	PDHA, pdhA; pyruvate dehydrogenase E1 component subunit alpha [EC:1.2.4.1]
comp30339_c0_seq1	K01580	E4.1.1.15, gadB, gadA, GAD; glutamate decarboxylase [EC:4.1.1.15]
comp31798_c0_seq1	K00074	paaH, hbd, fadB, mmgB; 3-hydroxybutyryl-CoA dehydrogenase [EC:1.1.1.157]
comp7247_c0_seq1	K01580	E4.1.1.15, gadB, gadA, GAD; glutamate decarboxylase [EC:4.1.1.15]
comp24731_c0_seq3	K01641	E2.3.3.10; hydroxymethylglutaryl-CoA synthase [EC:2.3.3.10]
comp18728_c0_seq4	K01653	E2.2.1.6S, ilvH, ilvN; acetolactate synthase I/III small subunit [EC:2.2.1.6]
comp7837_c0_seq1	K16871	POP2; 4-aminobutyrate---pyruvate transaminase [EC:2.6.1.96]
comp22083_c0_seq2	K01653	E2.2.1.6S, ilvH, ilvN; acetolactate synthase I/III small subunit [EC:2.2.1.6]
comp18552_c0_seq1	K00162	PDHB, pdhB; pyruvate dehydrogenase E1 component subunit beta [EC:1.2.4.1]
comp21298_c0_seq1	K00162	PDHB, pdhB; pyruvate dehydrogenase E1 component subunit beta [EC:1.2.4.1]
comp7272_c0_seq1	K01704	leuD; 3-isopropylmalate/(R)-2-methylmalate dehydratase small subunit [EC:4.2.1.33 4.2.1.35]
comp13594_c0_seq1	K01703	leuC; 3-isopropylmalate/(R)-2-methylmalate dehydratase large subunit [EC:4.2.1.33 4.2.1.35]
comp18728_c0_seq4	K01653	E2.2.1.6S, ilvH, ilvN; acetolactate synthase I/III small subunit [EC:2.2.1.6]
comp22083_c0_seq2	K01653	E2.2.1.6S, ilvH, ilvN; acetolactate synthase I/III small subunit [EC:2.2.1.6]
comp7589_c0_seq1	K00600	glyA, SHMT; glycine hydroxymethyltransferase [EC:2.1.2.1]
comp23739_c0_seq1	K01934	E6.3.3.2; 5-formyltetrahydrofolate cyclo-ligase [EC:6.3.3.2]
comp14509_c1_seq2	K00600	glyA, SHMT; glycine hydroxymethyltransferase [EC:2.1.2.1]
comp28298_c0_seq1	K00297	metF, MTHFR; methylenetetrahydrofolate reductase (NADPH) [EC:1.5.1.20]
comp26324_c1_seq20	K00600	glyA, SHMT; glycine hydroxymethyltransferase [EC:2.1.2.1]
comp30139_c0_seq1	K00600	glyA, SHMT; glycine hydroxymethyltransferase [EC:2.1.2.1]
comp7948_c0_seq1	K01938	fhs; formate--tetrahydrofolate ligase [EC:6.3.4.3]
comp24797_c0_seq25	K00604	MTFMT, fmt; methionyl-tRNA formyltransferase [EC:2.1.2.9]
comp15857_c0_seq1	K13998	DHFR-TS; dihydrofolate reductase / thymidylate synthase [EC:1.5.1.3 2.1.1.45]
comp18165_c1_seq1	K01433	purU; formyltetrahydrofolate deformylase [EC:3.5.1.10]
comp7555_c0_seq1	K00605	gcvT, AMT; aminomethyltransferase [EC:2.1.2.10]
comp20464_c1_seq1	K00602	purH; phosphoribosylaminoimidazolecarboxamide formyltransferase / IMP cyclohydrolase [EC:2.1.2.3 3.5.4.10]
comp60327_c0_seq1	K00287	folA; dihydrofolate reductase [EC:1.5.1.3]
comp25405_c1_seq1	K00600	glyA, SHMT; glycine hydroxymethyltransferase [EC:2.1.2.1]
comp7589_c0_seq1	K00600	glyA, SHMT; glycine hydroxymethyltransferase [EC:2.1.2.1]
comp22134_c0_seq1	K03841	FBP, fbp; fructose-1,6-bisphosphatase I [EC:3.1.3.11]
comp8379_c0_seq1	K00850	pfkA, PFK; 6-phosphofructokinase 1 [EC:2.7.1.11]
comp16013_c0_seq1	K00121	frmA, ADH5, adhC; S-(hydroxymethyl)glutathione dehydrogenase / alcohol dehydrogenase [EC:1.1.1.284 1.1.1.1]
comp14509_c1_seq2	K00600	glyA, SHMT; glycine hydroxymethyltransferase [EC:2.1.2.1]
comp23740_c0_seq1	K01623	ALDO; fructose-bisphosphate aldolase, class I [EC:4.1.2.13]
comp13307_c0_seq1	K01895	ACSS, acs; acetyl-CoA synthetase [EC:6.2.1.1]
comp233726_c0_seq1	K03841	FBP, fbp; fructose-1,6-bisphosphatase I [EC:3.1.3.11]
comp26324_c1_seq20	K00600	glyA, SHMT; glycine hydroxymethyltransferase [EC:2.1.2.1]
comp15884_c0_seq1	K01070	frmB, ESD, fghA; S-formylglutathione hydrolase [EC:3.1.2.12]
comp12822_c0_seq1	K15634	gpmB; probable phosphoglycerate mutase [EC:5.4.2.12]
comp18960_c0_seq4	K00850	pfkA, PFK; 6-phosphofructokinase 1 [EC:2.7.1.11]
comp16564_c0_seq1	K00831	serC, PSAT1; phosphoserine aminotransferase [EC:2.6.1.52]
comp7075_c0_seq1	K00058	serA, PHGDH; D-3-phosphoglycerate dehydrogenase [EC:1.1.1.95]
comp6806_c0_seq1	K01834	PGAM, gpmA; 2,3-bisphosphoglycerate-dependent phosphoglycerate mutase [EC:5.4.2.11]
comp19154_c0_seq6	K00850	pfkA, PFK; 6-phosphofructokinase 1 [EC:2.7.1.11]
comp30139_c0_seq1	K00600	glyA, SHMT; glycine hydroxymethyltransferase [EC:2.1.2.1]
comp14571_c0_seq1	K01689	ENO, eno; enolase [EC:4.2.1.11]
comp26920_c0_seq1	K00122	FDH; formate dehydrogenase [EC:1.2.1.2]
comp25892_c1_seq1	K00850	pfkA, PFK; 6-phosphofructokinase 1 [EC:2.7.1.11]
comp24864_c0_seq3	K00441	frhB; coenzyme F420 hydrogenase beta subunit [EC:1.12.98.1]
comp21241_c0_seq1	K01689	ENO, eno; enolase [EC:4.2.1.11]
comp16301_c0_seq2	K15634	gpmB; probable phosphoglycerate mutase [EC:5.4.2.12]
comp22056_c0_seq1	K00850	pfkA, PFK; 6-phosphofructokinase 1 [EC:2.7.1.11]
comp26535_c0_seq1	K01689	ENO, eno; enolase [EC:4.2.1.11]
comp31805_c0_seq1	K00058	serA, PHGDH; D-3-phosphoglycerate dehydrogenase [EC:1.1.1.95]
comp24292_c0_seq1	K15633	gpmI; 2,3-bisphosphoglycerate-independent phosphoglycerate mutase [EC:5.4.2.12]
comp25350_c0_seq1	K03841	FBP, fbp; fructose-1,6-bisphosphatase I [EC:3.1.3.11]
comp21460_c0_seq6	K15634	gpmB; probable phosphoglycerate mutase [EC:5.4.2.12]
comp27876_c0_seq1	K00121	frmA, ADH5, adhC; S-(hydroxymethyl)glutathione dehydrogenase / alcohol dehydrogenase [EC:1.1.1.284 1.1.1.1]
comp14563_c0_seq2	K15634	gpmB; probable phosphoglycerate mutase [EC:5.4.2.12]
comp8024_c0_seq2	K00058	serA, PHGDH; D-3-phosphoglycerate dehydrogenase [EC:1.1.1.95]
comp7557_c0_seq1	K01623	ALDO; fructose-bisphosphate aldolase, class I [EC:4.1.2.13]
comp25245_c0_seq1	K01689	ENO, eno; enolase [EC:4.2.1.11]
comp573_c0_seq2	K00121	frmA, ADH5, adhC; S-(hydroxymethyl)glutathione dehydrogenase / alcohol dehydrogenase [EC:1.1.1.284 1.1.1.1]
comp20076_c0_seq1	K01834	PGAM, gpmA; 2,3-bisphosphoglycerate-dependent phosphoglycerate mutase [EC:5.4.2.11]
comp19532_c0_seq2	K01595	ppc; phosphoenolpyruvate carboxylase [EC:4.1.1.31]
comp25271_c1_seq1	K01079	serB, PSPH; phosphoserine phosphatase [EC:3.1.3.3]
comp15735_c0_seq1	K01623	ALDO; fructose-bisphosphate aldolase, class I [EC:4.1.2.13]
comp20943_c0_seq1	K01595	ppc; phosphoenolpyruvate carboxylase [EC:4.1.1.31]
comp25405_c1_seq1	K00600	glyA, SHMT; glycine hydroxymethyltransferase [EC:2.1.2.1]
comp21852_c0_seq2	K01783	rpe, RPE; ribulose-phosphate 3-epimerase [EC:5.1.3.1]
comp18645_c0_seq1	K01807	rpiA; ribose 5-phosphate isomerase A [EC:5.3.1.6]
comp7089_c0_seq1	K00026	MDH2; malate dehydrogenase [EC:1.1.1.37]
comp22134_c0_seq1	K03841	FBP, fbp; fructose-1,6-bisphosphatase I [EC:3.1.3.11]
comp20616_c0_seq1	K00026	MDH2; malate dehydrogenase [EC:1.1.1.37]
comp23740_c0_seq1	K01623	ALDO; fructose-bisphosphate aldolase, class I [EC:4.1.2.13]
comp15882_c0_seq1	K00029	E1.1.1.40, maeB; malate dehydrogenase (oxaloacetate-decarboxylating)(NADP+) [EC:1.1.1.40]
comp16078_c0_seq1	K01803	TPI, tpiA; triosephosphate isomerase (TIM) [EC:5.3.1.1]
comp233726_c0_seq1	K03841	FBP, fbp; fructose-1,6-bisphosphatase I [EC:3.1.3.11]
comp15788_c0_seq1	K00134	GAPDH, gapA; glyceraldehyde 3-phosphate dehydrogenase [EC:1.2.1.12]
comp10663_c0_seq1	K01807	rpiA; ribose 5-phosphate isomerase A [EC:5.3.1.6]
comp28543_c0_seq1	K01602	rbcS; ribulose-bisphosphate carboxylase small chain [EC:4.1.1.39]
comp22127_c0_seq3	K01610	E4.1.1.49, pckA; phosphoenolpyruvate carboxykinase (ATP) [EC:4.1.1.49]
comp21351_c0_seq10	K01783	rpe, RPE; ribulose-phosphate 3-epimerase [EC:5.1.3.1]
comp12477_c0_seq1	K00615	E2.2.1.1, tktA, tktB; transketolase [EC:2.2.1.1]
comp23289_c0_seq1	K00927	PGK, pgk; phosphoglycerate kinase [EC:2.7.2.3]
comp19849_c0_seq2	K00026	MDH2; malate dehydrogenase [EC:1.1.1.37]
comp76217_c0_seq1	K01100	E3.1.3.37; sedoheptulose-bisphosphatase [EC:3.1.3.37]
comp20496_c0_seq1	K00855	PRK, prkB; phosphoribulokinase [EC:2.7.1.19]
comp20514_c0_seq1	K14454	GOT1; aspartate aminotransferase, cytoplasmic [EC:2.6.1.1]
comp25350_c0_seq1	K03841	FBP, fbp; fructose-1,6-bisphosphatase I [EC:3.1.3.11]
comp15510_c0_seq2	K14272	GGAT; glutamate--glyoxylate aminotransferase [EC:2.6.1.4 2.6.1.2 2.6.1.44 2.6.1.-]
comp22388_c0_seq1	K14455	GOT2; aspartate aminotransferase, mitochondrial [EC:2.6.1.1]
comp18840_c0_seq1	K00028	E1.1.1.39; malate dehydrogenase (decarboxylating) [EC:1.1.1.39]
comp36164_c0_seq1	K05298	GAPA; glyceraldehyde-3-phosphate dehydrogenase (NADP+) (phosphorylating) [EC:1.2.1.13]
comp13410_c0_seq1	K00026	MDH2; malate dehydrogenase [EC:1.1.1.37]
comp11615_c0_seq1	K00615	E2.2.1.1, tktA, tktB; transketolase [EC:2.2.1.1]
comp27247_c0_seq1	K01803	TPI, tpiA; triosephosphate isomerase (TIM) [EC:5.3.1.1]
comp8131_c0_seq1	K00028	E1.1.1.39; malate dehydrogenase (decarboxylating) [EC:1.1.1.39]
comp7557_c0_seq1	K01623	ALDO; fructose-bisphosphate aldolase, class I [EC:4.1.2.13]
comp28965_c0_seq1	K00814	GPT, ALT; alanine transaminase [EC:2.6.1.2]
comp20215_c0_seq1	K14454	GOT1; aspartate aminotransferase, cytoplasmic [EC:2.6.1.1]
comp21384_c0_seq1	K00134	GAPDH, gapA; glyceraldehyde 3-phosphate dehydrogenase [EC:1.2.1.12]
comp19532_c0_seq2	K01595	ppc; phosphoenolpyruvate carboxylase [EC:4.1.1.31]
comp20523_c0_seq1	K01602	rbcS; ribulose-bisphosphate carboxylase small chain [EC:4.1.1.39]
comp15735_c0_seq1	K01623	ALDO; fructose-bisphosphate aldolase, class I [EC:4.1.2.13]
comp7365_c0_seq1	K00025	MDH1; malate dehydrogenase [EC:1.1.1.37]
comp20943_c0_seq1	K01595	ppc; phosphoenolpyruvate carboxylase [EC:4.1.1.31]
comp24838_c0_seq1	K01962	accA; acetyl-CoA carboxylase carboxyl transferase subunit alpha [EC:6.4.1.2]
comp18079_c1_seq1	K00031	IDH1, IDH2, icd; isocitrate dehydrogenase [EC:1.1.1.42]
comp12034_c0_seq1	K00626	E2.3.1.9, atoB; acetyl-CoA C-acetyltransferase [EC:2.3.1.9]
comp22703_c0_seq1	K01681	ACO, acnA; aconitate hydratase [EC:4.2.1.3]
comp23258_c0_seq1	K01648	ACLY; ATP citrate (pro-S)-lyase [EC:2.3.3.8]
comp28298_c0_seq1	K00297	metF, MTHFR; methylenetetrahydrofolate reductase (NADPH) [EC:1.5.1.20]
comp13307_c0_seq1	K01895	ACSS, acs; acetyl-CoA synthetase [EC:6.2.1.1]
comp20682_c0_seq1	K01681	ACO, acnA; aconitate hydratase [EC:4.2.1.3]
comp8011_c0_seq1	K01648	ACLY; ATP citrate (pro-S)-lyase [EC:2.3.3.8]
comp7948_c0_seq1	K01938	fhs; formate--tetrahydrofolate ligase [EC:6.3.4.3]
comp27324_c0_seq1	K01648	ACLY; ATP citrate (pro-S)-lyase [EC:2.3.3.8]
comp22866_c0_seq1	K00031	IDH1, IDH2, icd; isocitrate dehydrogenase [EC:1.1.1.42]
comp23691_c0_seq1	K01679	E4.2.1.2B, fumC; fumarate hydratase, class II [EC:4.2.1.2]
comp16617_c0_seq5	K01962	accA; acetyl-CoA carboxylase carboxyl transferase subunit alpha [EC:6.4.1.2]
comp13970_c0_seq1	K01961	accC; acetyl-CoA carboxylase, biotin carboxylase subunit [EC:6.4.1.2 6.3.4.14]
comp19532_c0_seq2	K01595	ppc; phosphoenolpyruvate carboxylase [EC:4.1.1.31]
comp20943_c0_seq1	K01595	ppc; phosphoenolpyruvate carboxylase [EC:4.1.1.31]
comp26352_c0_seq3	K11717	sufS; cysteine desulfurase / selenocysteine lyase [EC:2.8.1.7 4.4.1.16]
comp24473_c1_seq4	K14153	thiDE; hydroxymethylpyrimidine kinase / phosphomethylpyrimidine kinase / thiamine-phosphate diphosphorylase [EC:2.7.1.49 2.7.4.7 2.5.1.3]
comp22537_c0_seq1	K06928	K06928; nucleoside-triphosphatase THEP1 [EC:3.6.1.15]
comp27791_c0_seq1	K01662	dxs; 1-deoxy-D-xylulose-5-phosphate synthase [EC:2.2.1.7]
comp21404_c0_seq2	K01662	dxs; 1-deoxy-D-xylulose-5-phosphate synthase [EC:2.2.1.7]
comp16267_c0_seq2	K00878	thiM; hydroxyethylthiazole kinase [EC:2.7.1.50]
comp25503_c0_seq2	K01662	dxs; 1-deoxy-D-xylulose-5-phosphate synthase [EC:2.2.1.7]
comp24064_c2_seq1	K01662	dxs; 1-deoxy-D-xylulose-5-phosphate synthase [EC:2.2.1.7]
comp9300_c0_seq2	K04487	iscS, NFS1; cysteine desulfurase [EC:2.8.1.7]
comp7032_c0_seq1	K00949	E2.7.6.2, THI80; thiamine pyrophosphokinase [EC:2.7.6.2]
comp16080_c0_seq2	K00794	ribH, RIB4; 6,7-dimethyl-8-ribityllumazine synthase [EC:2.5.1.78]
comp22350_c0_seq5	K00861	RFK, FMN1; riboflavin kinase [EC:2.7.1.26]
comp18272_c1_seq1	K11752	ribD; diaminohydroxyphosphoribosylaminopyrimidine deaminase / 5-amino-6-(5-phosphoribosylamino)uracil reductase [EC:3.5.4.26 1.1.1.193]
comp23508_c0_seq1	K14652	ribBA; 3,4-dihydroxy 2-butanone 4-phosphate synthase / GTP cyclohydrolase II [EC:4.1.99.12 3.5.4.25]
comp24970_c0_seq1	K13248	PHOSPHO2; pyridoxal phosphate phosphatase PHOSPHO2 [EC:3.1.3.74]
comp21300_c0_seq5	K08681	pdxT, pdx2; glutamine amidotransferase [EC:2.6.-.-]
comp16564_c0_seq1	K00831	serC, PSAT1; phosphoserine aminotransferase [EC:2.6.1.52]
comp10157_c0_seq1	K13248	PHOSPHO2; pyridoxal phosphate phosphatase PHOSPHO2 [EC:3.1.3.74]
comp40420_c0_seq1	K06215	pdxS, pdx1; pyridoxine biosynthesis protein [EC:4.-.-.-]
comp24022_c0_seq3	K00868	pdxK, pdxY; pyridoxine kinase [EC:2.7.1.35]
comp13295_c0_seq1	K06215	pdxS, pdx1; pyridoxine biosynthesis protein [EC:4.-.-.-]
comp18791_c0_seq1	K01733	thrC; threonine synthase [EC:4.2.3.1]
comp21514_c0_seq1	K01081	E3.1.3.5; 5'-nucleotidase [EC:3.1.3.5]
comp13117_c0_seq1	K01240	URH1; uridine nucleosidase [EC:3.2.2.3]
comp24611_c0_seq1	K01950	E6.3.5.1, NADSYN1, QNS1, nadE; NAD+ synthase (glutamine-hydrolysing) [EC:6.3.5.1]
comp21648_c0_seq2	K00763	pncB, NAPRT1; nicotinate phosphoribosyltransferase [EC:6.3.4.21]
comp23052_c0_seq13	K00767	nadC, QPRT; nicotinate-nucleotide pyrophosphorylase (carboxylating) [EC:2.4.2.19]
comp24510_c0_seq30	K00858	ppnK, NADK; NAD+ kinase [EC:2.7.1.23]
comp11617_c0_seq1	K03517	nadA; quinolinate synthase [EC:2.5.1.72]
comp24882_c0_seq1	K03787	surE; 5'-nucleotidase [EC:3.1.3.5]
comp19076_c0_seq1	K06210	NMNAT; nicotinamide mononucleotide adenylyltransferase [EC:2.7.7.1 2.7.7.18]
comp29719_c0_seq1	K03787	surE; 5'-nucleotidase [EC:3.1.3.5]
comp16234_c0_seq2	K00278	nadB; L-aspartate oxidase [EC:1.4.3.16]
comp7201_c0_seq1	K01598	PPCDC, coaC; phosphopantothenoylcysteine decarboxylase [EC:4.1.1.36]
comp16044_c0_seq1	K00826	E2.6.1.42, ilvE; branched-chain amino acid aminotransferase [EC:2.6.1.42]
comp22862_c0_seq2	K00606	panB; 3-methyl-2-oxobutanoate hydroxymethyltransferase [EC:2.1.2.11]
comp7676_c0_seq1	K00826	E2.6.1.42, ilvE; branched-chain amino acid aminotransferase [EC:2.6.1.42]
comp15627_c0_seq1	K09680	coaW; type II pantothenate kinase [EC:2.7.1.33]
comp11984_c0_seq1	K00053	ilvC; ketol-acid reductoisomerase [EC:1.1.1.86]
comp21253_c0_seq2	K00826	E2.6.1.42, ilvE; branched-chain amino acid aminotransferase [EC:2.6.1.42]
comp6670_c0_seq2	K06133	LYS5, acpT; 4'-phosphopantetheinyl transferase [EC:2.7.8.-]
comp20874_c0_seq1	K00826	E2.6.1.42, ilvE; branched-chain amino acid aminotransferase [EC:2.6.1.42]
comp26140_c0_seq1	K00053	ilvC; ketol-acid reductoisomerase [EC:1.1.1.86]
comp22898_c0_seq1	K01687	ilvD; dihydroxy-acid dehydratase [EC:4.2.1.9]
comp19040_c0_seq1	K01922	PPCS, coaB; phosphopantothenate-cysteine ligase [EC:6.3.2.5]
comp18279_c0_seq2	K06133	LYS5, acpT; 4'-phosphopantetheinyl transferase [EC:2.7.8.-]
comp18728_c0_seq4	K01653	E2.2.1.6S, ilvH, ilvN; acetolactate synthase I/III small subunit [EC:2.2.1.6]
comp22083_c0_seq2	K01653	E2.2.1.6S, ilvH, ilvN; acetolactate synthase I/III small subunit [EC:2.2.1.6]
comp21204_c0_seq1	K00207	DPYD; dihydropyrimidine dehydrogenase (NADP+) [EC:1.3.1.2]
comp35438_c0_seq1	K01431	UPB1; beta-ureidopropionase [EC:3.5.1.6]
comp23486_c0_seq3	K01464	DPYS, dht, hydA; dihydropyrimidinase [EC:3.5.2.2]
comp10713_c0_seq1	K00859	coaE; dephospho-CoA kinase [EC:2.7.1.24]
comp11620_c0_seq2	K00833	bioA; adenosylmethionine-8-amino-7-oxononanoate aminotransferase [EC:2.6.1.62]
comp15650_c0_seq1	K00059	fabG; 3-oxoacyl-[acyl-carrier protein] reductase [EC:1.1.1.100]
comp19554_c0_seq1	K00059	fabG; 3-oxoacyl-[acyl-carrier protein] reductase [EC:1.1.1.100]
comp18472_c0_seq2	K09458	fabF; 3-oxoacyl-[acyl-carrier-protein] synthase II [EC:2.3.1.179]
comp7486_c0_seq1	K01012	bioB; biotin synthase [EC:2.8.1.6]
comp20374_c0_seq1	K09458	fabF; 3-oxoacyl-[acyl-carrier-protein] synthase II [EC:2.3.1.179]
comp18930_c0_seq1	K00208	fabI; enoyl-[acyl-carrier protein] reductase I [EC:1.3.1.9 1.3.1.10]
comp28012_c0_seq1	K00208	fabI; enoyl-[acyl-carrier protein] reductase I [EC:1.3.1.9 1.3.1.10]
comp16606_c0_seq1	K00059	fabG; 3-oxoacyl-[acyl-carrier protein] reductase [EC:1.1.1.100]
comp23274_c0_seq1	K00652	bioF; 8-amino-7-oxononanoate synthase [EC:2.3.1.47]
comp18822_c0_seq2	K02372	fabZ; 3-hydroxyacyl-[acyl-carrier-protein] dehydratase [EC:4.2.1.59]
comp23717_c0_seq13	K09458	fabF; 3-oxoacyl-[acyl-carrier-protein] synthase II [EC:2.3.1.179]
comp18587_c0_seq1	K02372	fabZ; 3-hydroxyacyl-[acyl-carrier-protein] dehydratase [EC:4.2.1.59]
comp20065_c0_seq4	K03644	lipA; lipoic acid synthetase [EC:2.8.1.8]
comp9793_c0_seq2	K03801	lipB; lipoyl(octanoyl) transferase [EC:2.3.1.181]
comp8975_c0_seq1	K03644	lipA; lipoic acid synthetase [EC:2.8.1.8]
comp28974_c0_seq1	K01307	GGH; gamma-glutamyl hydrolase [EC:3.4.19.9]
comp16841_c0_seq2	K01113	phoD; alkaline phosphatase D [EC:3.1.3.1]
comp7968_c0_seq1	K13950	pabAB; para-aminobenzoate synthetase [EC:2.6.1.85]
comp25818_c0_seq14	K01930	FPGS; folylpolyglutamate synthase [EC:6.3.2.17]
comp19268_c0_seq1	K13941	folKP; 2-amino-4-hydroxy-6-hydroxymethyldihydropteridine diphosphokinase / dihydropteroate synthase [EC:2.7.6.3 2.5.1.15]
comp16484_c0_seq1	K01633	folB; dihydroneopterin aldolase [EC:4.1.2.25]
comp15857_c0_seq1	K13998	DHFR-TS; dihydrofolate reductase / thymidylate synthase [EC:1.5.1.3 2.1.1.45]
comp23564_c0_seq2	K01930	FPGS; folylpolyglutamate synthase [EC:6.3.2.17]
comp24754_c0_seq1	K01495	GCH1, folE; GTP cyclohydrolase I [EC:3.5.4.16]
comp60327_c0_seq1	K00287	folA; dihydrofolate reductase [EC:1.5.1.3]
comp19529_c0_seq3	K01930	FPGS; folylpolyglutamate synthase [EC:6.3.2.17]
comp21645_c1_seq2	K00699	UGT; glucuronosyltransferase [EC:2.4.1.17]
comp22405_c0_seq2	K11155	DGAT1; diacylglycerol O-acyltransferase 1 [EC:2.3.1.20 2.3.1.75 2.3.1.76]
comp25388_c0_seq1	K00699	UGT; glucuronosyltransferase [EC:2.4.1.17]
comp46737_c0_seq1	K00699	UGT; glucuronosyltransferase [EC:2.4.1.17]
comp149427_c0_seq1	K00699	UGT; glucuronosyltransferase [EC:2.4.1.17]
comp16013_c0_seq1	K00121	frmA, ADH5, adhC; S-(hydroxymethyl)glutathione dehydrogenase / alcohol dehydrogenase [EC:1.1.1.284 1.1.1.1]
comp25977_c0_seq1	K00699	UGT; glucuronosyltransferase [EC:2.4.1.17]
comp56697_c0_seq1	K00699	UGT; glucuronosyltransferase [EC:2.4.1.17]
comp20685_c0_seq1	K07408	CYP1A1; cytochrome P450, family 1, subfamily A, polypeptide 1 [EC:1.14.14.1]
comp18245_c0_seq1	K00699	UGT; glucuronosyltransferase [EC:2.4.1.17]
comp11450_c0_seq1	K00001	E1.1.1.1, adh; alcohol dehydrogenase [EC:1.1.1.1]
comp27876_c0_seq1	K00121	frmA, ADH5, adhC; S-(hydroxymethyl)glutathione dehydrogenase / alcohol dehydrogenase [EC:1.1.1.284 1.1.1.1]
comp95188_c0_seq1	K00699	UGT; glucuronosyltransferase [EC:2.4.1.17]
comp7956_c0_seq2	K00699	UGT; glucuronosyltransferase [EC:2.4.1.17]
comp6848_c0_seq1	K00001	E1.1.1.1, adh; alcohol dehydrogenase [EC:1.1.1.1]
comp14395_c0_seq1	K00699	UGT; glucuronosyltransferase [EC:2.4.1.17]
comp573_c0_seq2	K00121	frmA, ADH5, adhC; S-(hydroxymethyl)glutathione dehydrogenase / alcohol dehydrogenase [EC:1.1.1.284 1.1.1.1]
comp90130_c0_seq1	K07408	CYP1A1; cytochrome P450, family 1, subfamily A, polypeptide 1 [EC:1.14.14.1]
comp33878_c0_seq2	K11147	DHRS4; dehydrogenase/reductase SDR family member 4 [EC:1.1.-.-]
comp21645_c1_seq2	K00699	UGT; glucuronosyltransferase [EC:2.4.1.17]
comp36966_c0_seq1	K02492	hemA; glutamyl-tRNA reductase [EC:1.2.1.70]
comp25388_c0_seq1	K00699	UGT; glucuronosyltransferase [EC:2.4.1.17]
comp27974_c0_seq1	K10960	chlP, bchP; geranylgeranyl reductase [EC:1.3.1.83]
comp46737_c0_seq1	K00699	UGT; glucuronosyltransferase [EC:2.4.1.17]
comp149427_c0_seq1	K00699	UGT; glucuronosyltransferase [EC:2.4.1.17]
comp25034_c0_seq5	K08101	E1.3.7.4; phytochromobilin:ferredoxin oxidoreductase [EC:1.3.7.4]
comp25977_c0_seq1	K00699	UGT; glucuronosyltransferase [EC:2.4.1.17]
comp23616_c0_seq7	K01772	hemH, FECH; ferrochelatase [EC:4.99.1.1]
comp56697_c0_seq1	K00699	UGT; glucuronosyltransferase [EC:2.4.1.17]
comp43212_c0_seq1	K13545	ACD2; red chlorophyll catabolite reductase [EC:1.3.1.80]
comp46494_c0_seq1	K03428	E2.1.1.11, chlM, bchM; magnesium-protoporphyrin O-methyltransferase [EC:2.1.1.11]
comp18245_c0_seq1	K00699	UGT; glucuronosyltransferase [EC:2.4.1.17]
comp23375_c0_seq1	K02495	hemN, hemZ; oxygen-independent coproporphyrinogen III oxidase [EC:1.3.99.22]
comp16446_c0_seq2	K01599	hemE, UROD; uroporphyrinogen decarboxylase [EC:4.1.1.37]
comp51364_c0_seq1	K00510	HMOX, hmuO, ho; heme oxygenase [EC:1.14.99.3]
comp12014_c0_seq2	K13600	CAO; chlorophyllide a oxygenase [EC:1.14.13.122]
comp21660_c0_seq1	K00218	E1.3.1.33, por; protochlorophyllide reductase [EC:1.3.1.33]
comp23314_c0_seq2	K03404	chlD, bchD; magnesium chelatase subunit D [EC:6.6.1.1]
comp25020_c0_seq1	K03403	chlH, bchH; magnesium chelatase subunit H [EC:6.6.1.1]
comp21753_c0_seq1	K01719	hemD, UROS; uroporphyrinogen-III synthase [EC:4.2.1.75]
comp12556_c0_seq1	K00522	FTH1; ferritin heavy chain [EC:1.16.3.1]
comp20498_c0_seq8	K00231	PPOX, hemY; oxygen-dependent protoporphyrinogen oxidase [EC:1.3.3.4]
comp25472_c0_seq1	K01885	EARS, gltX; glutamyl-tRNA synthetase [EC:6.1.1.17]
comp13652_c0_seq1	K00228	CPOX, hemF; coproporphyrinogen III oxidase [EC:1.3.3.3]
comp95188_c0_seq1	K00699	UGT; glucuronosyltransferase [EC:2.4.1.17]
comp6050_c0_seq1	K13071	PAO, ACD1; pheophorbide a oxygenase [EC:1.14.12.20]
comp19922_c0_seq2	K01749	hemC, HMBS; hydroxymethylbilane synthase [EC:2.5.1.61]
comp7956_c0_seq2	K00699	UGT; glucuronosyltransferase [EC:2.4.1.17]
comp8228_c0_seq2	K01599	hemE, UROD; uroporphyrinogen decarboxylase [EC:4.1.1.37]
comp23026_c0_seq1	K13606	NOL, NYC1; chlorophyll(ide) b reductase [EC:1.1.1.294]
comp22933_c0_seq4	K04040	chlG, bchG; chlorophyll synthase [EC:2.5.1.62]
comp24691_c0_seq1	K00522	FTH1; ferritin heavy chain [EC:1.16.3.1]
comp6866_c0_seq1	K03405	chlI, bchI; magnesium chelatase subunit I [EC:6.6.1.1]
comp14395_c0_seq1	K00699	UGT; glucuronosyltransferase [EC:2.4.1.17]
comp11422_c0_seq2	K08099	E3.1.1.14; chlorophyllase [EC:3.1.1.14]
comp26191_c0_seq1	K01772	hemH, FECH; ferrochelatase [EC:4.99.1.1]
comp20828_c0_seq1	K04035	E1.14.13.81, acsF, chlE; magnesium-protoporphyrin IX monomethyl ester (oxidative) cyclase [EC:1.14.13.81]
comp14738_c0_seq1	K01845	hemL; glutamate-1-semialdehyde 2,1-aminomutase [EC:5.4.3.8]
comp34616_c0_seq1	K13789	GGPS; geranylgeranyl diphosphate synthase, type II [EC:2.5.1.1 2.5.1.10 2.5.1.29]
comp12034_c0_seq1	K00626	E2.3.1.9, atoB; acetyl-CoA C-acetyltransferase [EC:2.3.1.9]
comp24939_c0_seq1	K00869	E2.7.1.36, MVK, mvaK1; mevalonate kinase [EC:2.7.1.36]
comp27974_c0_seq1	K10960	chlP, bchP; geranylgeranyl reductase [EC:1.3.1.83]
comp8506_c0_seq1	K11778	DHDDS, RER2, SRT1; ditrans,polycis-polyprenyl diphosphate synthase [EC:2.5.1.87]
comp76145_c0_seq1	K00806	uppS; undecaprenyl diphosphate synthase [EC:2.5.1.31]
comp16648_c0_seq2	K00587	ICMT, STE14; protein-S-isoprenylcysteine O-methyltransferase [EC:2.1.1.100]
comp24214_c0_seq1	K00021	E1.1.1.34; hydroxymethylglutaryl-CoA reductase (NADPH) [EC:1.1.1.34]
comp8859_c0_seq1	K13789	GGPS; geranylgeranyl diphosphate synthase, type II [EC:2.5.1.1 2.5.1.10 2.5.1.29]
comp27731_c0_seq1	K00021	E1.1.1.34; hydroxymethylglutaryl-CoA reductase (NADPH) [EC:1.1.1.34]
comp21383_c0_seq5	K08658	RCE1, FACE2; prenyl protein peptidase [EC:3.4.22.-]
comp27791_c0_seq1	K01662	dxs; 1-deoxy-D-xylulose-5-phosphate synthase [EC:2.2.1.7]
comp21404_c0_seq2	K01662	dxs; 1-deoxy-D-xylulose-5-phosphate synthase [EC:2.2.1.7]
comp30632_c0_seq1	K03527	E1.17.1.2, lytB, ispH; 4-hydroxy-3-methylbut-2-enyl diphosphate reductase [EC:1.17.1.2]
comp20974_c0_seq1	K14066	GPS; geranyl diphosphate synthase [EC:2.5.1.1]
comp12807_c0_seq1	K01823	idi, IDI; isopentenyl-diphosphate delta-isomerase [EC:5.3.3.2]
comp7203_c0_seq1	K06013	STE24; STE24 endopeptidase [EC:3.4.24.84]
comp7702_c1_seq1	K01770	ispF; 2-C-methyl-D-erythritol 2,4-cyclodiphosphate synthase [EC:4.6.1.12]
comp17772_c0_seq2	K05954	FNTB; protein farnesyltransferase subunit beta [EC:2.5.1.58]
comp24984_c0_seq8	K15889	PCME; prenylcysteine alpha-carboxyl methylesterase [EC:3.1.1.-]
comp6435_c0_seq2	K05356	SPS, sds; all-trans-nonaprenyl-diphosphate synthase [EC:2.5.1.84 2.5.1.85]
comp25503_c0_seq2	K01662	dxs; 1-deoxy-D-xylulose-5-phosphate synthase [EC:2.2.1.7]
comp7202_c0_seq2	K15891	FLDH; farnesol dehydrogenase [EC:1.1.1.216]
comp14974_c0_seq1	K05906	PCYOX1, FCLY; prenylcysteine oxidase / farnesylcysteine lyase [EC:1.8.3.5 1.8.3.6]
comp24731_c0_seq3	K01641	E2.3.3.10; hydroxymethylglutaryl-CoA synthase [EC:2.3.3.10]
comp25104_c0_seq1	K00787	FDPS; farnesyl diphosphate synthase [EC:2.5.1.1 2.5.1.10]
comp24064_c2_seq1	K01662	dxs; 1-deoxy-D-xylulose-5-phosphate synthase [EC:2.2.1.7]
comp16481_c0_seq1	K15892	FOLK; farnesol kinase [EC:2.7.1.-]
comp21184_c0_seq1	K05955	FNTA; protein farnesyltransferase/geranylgeranyltransferase type-1 subunit alpha [EC:2.5.1.58 2.5.1.59]
comp32592_c0_seq1	K00919	ispE; 4-diphosphocytidyl-2-C-methyl-D-erythritol kinase [EC:2.7.1.148]
comp21385_c0_seq3	K00991	ispD; 2-C-methyl-D-erythritol 4-phosphate cytidylyltransferase [EC:2.7.7.60]
comp12677_c0_seq1	K11778	DHDDS, RER2, SRT1; ditrans,polycis-polyprenyl diphosphate synthase [EC:2.5.1.87]
comp22480_c0_seq1	K13789	GGPS; geranylgeranyl diphosphate synthase, type II [EC:2.5.1.1 2.5.1.10 2.5.1.29]
comp18927_c0_seq1	K03526	E1.17.7.1, gcpE, ispG; (E)-4-hydroxy-3-methylbut-2-enyl-diphosphate synthase [EC:1.17.7.1]
comp26258_c1_seq2	K00938	E2.7.4.2, mvaK2; phosphomevalonate kinase [EC:2.7.4.2]
comp20309_c0_seq1	K00099	dxr; 1-deoxy-D-xylulose-5-phosphate reductoisomerase [EC:1.1.1.267]
comp52584_c0_seq1	K01593	DDC; aromatic-L-amino-acid decarboxylase [EC:4.1.1.28]
comp5793_c0_seq1	K15086	TPS14; (3S)-linalool synthase [EC:4.2.3.25]
comp90545_c0_seq1	K07385	TPS-Cin; 1,8-cineole synthase [EC:4.2.3.108]
comp16903_c0_seq1	K15095	E1.1.1.208; (+)-neomenthol dehydrogenase [EC:1.1.1.208]
comp21286_c0_seq1	K00517	E1.14.-.-; [EC:1.14.-.-]
comp18302_c0_seq1	K00128	E1.2.1.3; aldehyde dehydrogenase (NAD+) [EC:1.2.1.3]
comp6491_c0_seq1	K00517	E1.14.-.-; [EC:1.14.-.-]
comp16201_c0_seq1	K00517	E1.14.-.-; [EC:1.14.-.-]
comp17697_c0_seq1	K00517	E1.14.-.-; [EC:1.14.-.-]
comp78794_c0_seq1	K00517	E1.14.-.-; [EC:1.14.-.-]
comp27099_c0_seq1	K00128	E1.2.1.3; aldehyde dehydrogenase (NAD+) [EC:1.2.1.3]
comp16901_c0_seq1	K00128	E1.2.1.3; aldehyde dehydrogenase (NAD+) [EC:1.2.1.3]
comp21090_c0_seq1	K00517	E1.14.-.-; [EC:1.14.-.-]
comp30843_c0_seq1	K00517	E1.14.-.-; [EC:1.14.-.-]
comp63643_c0_seq1	K00517	E1.14.-.-; [EC:1.14.-.-]
comp76210_c0_seq1	K00128	E1.2.1.3; aldehyde dehydrogenase (NAD+) [EC:1.2.1.3]
comp4369_c0_seq1	K04124	E1.14.11.15; gibberellin 3-beta-dioxygenase [EC:1.14.11.15]
comp7893_c0_seq1	K04125	E1.14.11.13; gibberellin 2-oxidase [EC:1.14.11.13]
comp16909_c0_seq1	K04125	E1.14.11.13; gibberellin 2-oxidase [EC:1.14.11.13]
comp108313_c0_seq1	K04120	E5.5.1.13; ent-copalyl diphosphate synthase [EC:5.5.1.13]
comp47051_c0_seq1	K05282	E1.14.11.12; gibberellin 20-oxidase [EC:1.14.11.12]
comp16713_c0_seq2	K04121	E4.2.3.19; ent-kaurene synthase [EC:4.2.3.19]
comp10870_c0_seq1	K04122	E1.14.13.78; ent-kaurene oxidase [EC:1.14.13.78]
comp15093_c0_seq2	K04123	KAO; ent-kaurenoic acid hydroxylase [EC:1.14.13.79]
comp17818_c0_seq1	K12640	CYP85A2, BR6OX2; cytochrome P450, family 85, subfamily A, polypeptide 2 (brassinosteroid-6-oxidase 2) [EC:1.14.-.-]
comp19978_c0_seq1	K12640	CYP85A2, BR6OX2; cytochrome P450, family 85, subfamily A, polypeptide 2 (brassinosteroid-6-oxidase 2) [EC:1.14.-.-]
comp20297_c0_seq3	K09587	CYP90B1, DWF4; cytochrome P450, family 90, subfamily B, polypeptide 1 (steroid 22-alpha-hydroxylase) [EC:1.14.13.-]
comp8935_c0_seq1	K09591	DET2; steroid 5-alpha-reductase [EC:1.3.1.22]
comp16287_c0_seq2	K09588	CYP90A1, CPD; cytochrome P450, family 90, subfamily A, polypeptide 1 [EC:1.14.-.-]
comp21581_c0_seq1	K15639	CYP734A1, BAS1; cytochrome P450, family 734, subfamily A, polypeptide 1 (PHYB activation tagged suppressor 1) [EC:1.14.-.-]
comp51721_c0_seq1	K09843	E1.14.13.93; (+)-abscisic acid 8'-hydroxylase [EC:1.14.13.93]
comp103122_c0_seq1	K09843	E1.14.13.93; (+)-abscisic acid 8'-hydroxylase [EC:1.14.13.93]
comp11894_c0_seq1	K09841	ABA2; xanthoxin dehydrogenase [EC:1.1.1.288]
comp18048_c0_seq2	K00514	ZDS, crtQ; zeta-carotene desaturase [EC:1.3.5.6]
comp20153_c0_seq4	K15744	Z-ISO; zeta-carotene isomerase [EC:5.2.1.12]
comp8805_c0_seq1	K09839	VDE, NPQ1; violaxanthin de-epoxidase [EC:1.10.99.3]
comp24200_c0_seq14	K02291	crtB; phytoene synthase [EC:2.5.1.32]
comp6080_c0_seq1	K09843	E1.14.13.93; (+)-abscisic acid 8'-hydroxylase [EC:1.14.13.93]
comp19353_c0_seq1	K09835	crtISO, crtH; prolycopene isomerase [EC:5.2.1.13]
comp25672_c1_seq6	K09838	ZEP, ABA1; zeaxanthin epoxidase [EC:1.14.13.90]
comp21337_c0_seq4	K15747	LUT5, CYP97A3; cytochrome P450, family 97, subfamily A (beta-ring hydroxylase) [EC:1.14.-.-]
comp18904_c0_seq1	K09840	NCED; 9-cis-epoxycarotenoid dioxygenase [EC:1.13.11.51]
comp20011_c1_seq2	K06443	lcyB, crtL1, crtY; lycopene beta-cyclase [EC:5.5.1.19]
comp23147_c0_seq1	K15746	crtZ; beta-carotene 3-hydroxylase [EC:1.14.13.129]
comp24390_c0_seq6	K09837	LUT1, CYP97C1; carotene epsilon-monooxygenase [EC:1.14.99.45]
comp131677_c0_seq1	K06444	lcyE, crtL2; lycopene epsilon-cyclase [EC:5.5.1.18]
comp7862_c0_seq1	K09840	NCED; 9-cis-epoxycarotenoid dioxygenase [EC:1.13.11.51]
comp109000_c0_seq1	K09843	E1.14.13.93; (+)-abscisic acid 8'-hydroxylase [EC:1.14.13.93]
comp17231_c0_seq1	K00279	E1.5.99.12; cytokinin dehydrogenase [EC:1.5.99.12]
[truncated: 1,726 more rows]
