# Supplementary material for: Comparative De Novo Transcriptome Analysis of Fertilized Ovules in Xanthoceras sorbifolium Uncovered a Pool of Genes Expressed Specifically or Preferentially in the Selfed Ovule That Are Potentially Involved in Late-Acting Self-Incompatibility
Source: PLoS One. 2015 Oct 20;10(10):e0140507. doi: 10.1371/journal.pone.0140507 (PMC4616620; doi:10.1371/journal.pone.0140507)
Supplement: S6 Table — (XLSX) [file pone.0140507.s006.xlsx]

## Sheet: Sheet1
S6 Table. The BRITE functional mapping categorized the unigenes into 252 KEGG pathways.
Pathway
00010 Glycolysis / Gluconeogenesis
00020 Citrate cycle (TCA cycle)
00030 Pentose phosphate pathway
00040 Pentose and glucuronate interconversions
00051 Fructose and mannose metabolism
00052 Galactose metabolism
00053 Ascorbate and aldarate metabolism
00061 Fatty acid biosynthesis
00062 Fatty acid elongation
00071 Fatty acid degradation
00072 Synthesis and degradation of ketone bodies
00073 Cutin, suberine and wax biosynthesis
00100 Steroid biosynthesis
00130 Ubiquinone and other terpenoid-quinone biosynthesis
00140 Steroid hormone biosynthesis
00190 Oxidative phosphorylation
00195 Photosynthesis
00196 Photosynthesis - antenna proteins
00230 Purine metabolism
00232 Caffeine metabolism
00240 Pyrimidine metabolism
00250 Alanine, aspartate and glutamate metabolism
00253 Tetracycline biosynthesis
00254 Aflatoxin biosynthesis
00260 Glycine, serine and threonine metabolism
00270 Cysteine and methionine metabolism
00280 Valine, leucine and isoleucine degradation
00281 Geraniol degradation
00290 Valine, leucine and isoleucine biosynthesis
00300 Lysine biosynthesis
00310 Lysine degradation
00330 Arginine and proline metabolism
00340 Histidine metabolism
00350 Tyrosine metabolism
00351 1,1,1-Trichloro-2,2-bis(4-chlorophenyl)ethane (DDT) degradation
00360 Phenylalanine metabolism
00361 Chlorocyclohexane and chlorobenzene degradation
00362 Benzoate degradation
00363 Bisphenol degradation
00364 Fluorobenzoate degradation
00380 Tryptophan metabolism
00400 Phenylalanine, tyrosine and tryptophan biosynthesis
00401 Novobiocin biosynthesis
00430 Taurine and hypotaurine metabolism
00440 Phosphonate and phosphinate metabolism
00450 Selenocompound metabolism
00460 Cyanoamino acid metabolism
00471 D-Glutamine and D-glutamate metabolism
00480 Glutathione metabolism
00500 Starch and sucrose metabolism
00510 N-Glycan biosynthesis
00511 Other glycan degradation
00513 Various types of N-glycan biosynthesis
00514 Other types of O-glycan biosynthesis
00520 Amino sugar and nucleotide sugar metabolism
00521 Streptomycin biosynthesis
00523 Polyketide sugar unit biosynthesis
00524 Butirosin and neomycin biosynthesis
00531 Glycosaminoglycan degradation
00532 Glycosaminoglycan biosynthesis - chondroitin sulfate / dermatan sulfate
00534 Glycosaminoglycan biosynthesis - heparan sulfate / heparin
00540 Lipopolysaccharide biosynthesis
00550 Peptidoglycan biosynthesis
00561 Glycerolipid metabolism
00562 Inositol phosphate metabolism
00563 Glycosylphosphatidylinositol(GPI)-anchor biosynthesis
00564 Glycerophospholipid metabolism
00565 Ether lipid metabolism
00590 Arachidonic acid metabolism
00591 Linoleic acid metabolism
00592 alpha-Linolenic acid metabolism
00600 Sphingolipid metabolism
00603 Glycosphingolipid biosynthesis - globo series
00604 Glycosphingolipid biosynthesis - ganglio series
00620 Pyruvate metabolism
00623 Toluene degradation
00624 Polycyclic aromatic hydrocarbon degradation
00625 Chloroalkane and chloroalkene degradation
00626 Naphthalene degradation
00627 Aminobenzoate degradation
00630 Glyoxylate and dicarboxylate metabolism
00640 Propanoate metabolism
00643 Styrene degradation
00650 Butanoate metabolism
00660 C5-Branched dibasic acid metabolism
00670 One carbon pool by folate
00680 Methane metabolism
00710 Carbon fixation in photosynthetic organisms
00720 Carbon fixation pathways in prokaryotes
00730 Thiamine metabolism
00740 Riboflavin metabolism
00750 Vitamin B6 metabolism
00760 Nicotinate and nicotinamide metabolism
00770 Pantothenate and CoA biosynthesis
00780 Biotin metabolism
00785 Lipoic acid metabolism
00790 Folate biosynthesis
00830 Retinol metabolism
00860 Porphyrin and chlorophyll metabolism
00900 Terpenoid backbone biosynthesis
00901 Indole alkaloid biosynthesis
00902 Monoterpenoid biosynthesis
00903 Limonene and pinene degradation
00904 Diterpenoid biosynthesis
00905 Brassinosteroid biosynthesis
00906 Carotenoid biosynthesis
00908 Zeatin biosynthesis
00909 Sesquiterpenoid and triterpenoid biosynthesis
00910 Nitrogen metabolism
00920 Sulfur metabolism
00940 Phenylpropanoid biosynthesis
00941 Flavonoid biosynthesis
00944 Flavone and flavonol biosynthesis
00945 Stilbenoid, diarylheptanoid and gingerol biosynthesis
00950 Isoquinoline alkaloid biosynthesis
00960 Tropane, piperidine and pyridine alkaloid biosynthesis
00965 Betalain biosynthesis
00966 Glucosinolate biosynthesis
00970 Aminoacyl-tRNA biosynthesis
00980 Metabolism of xenobiotics by cytochrome P450
00982 Drug metabolism - cytochrome P450
00983 Drug metabolism - other enzymes
00984 Steroid degradation
01040 Biosynthesis of unsaturated fatty acids
01051 Biosynthesis of ansamycins
01053 Biosynthesis of siderophore group nonribosomal peptides
01200 Carbon metabolism
01212 Fatty acid metabolism
01220 Degradation of aromatic compounds
01230 Biosynthesis of amino acids
02010 ABC transporters
02020 Two-component system
03008 Ribosome biogenesis in eukaryotes
03010 Ribosome
03013 RNA transport
03015 mRNA surveillance pathway
03018 RNA degradation
03020 RNA polymerase
03022 Basal transcription factors
03030 DNA replication
03040 Spliceosome
03050 Proteasome
03060 Protein export
03070 Bacterial secretion system
03320 PPAR signaling pathway
03410 Base excision repair
03420 Nucleotide excision repair
03430 Mismatch repair
03440 Homologous recombination
03450 Non-homologous end-joining
03460 Fanconi anemia pathway
04010 MAPK signaling pathway
04011 MAPK signaling pathway - yeast
04012 ErbB signaling pathway
04013 MAPK signaling pathway - fly
04014 Ras signaling pathway
04015 Rap1 signaling pathway
04020 Calcium signaling pathway
04062 Chemokine signaling pathway
04064 NF-kappa B signaling pathway
04066 HIF-1 signaling pathway
04070 Phosphatidylinositol signaling system
04075 Plant hormone signal transduction
04080 Neuroactive ligand-receptor interaction
04110 Cell cycle
04111 Cell cycle - yeast
04112 Cell cycle - Caulobacter
04113 Meiosis - yeast
04114 Oocyte meiosis
04115 p53 signaling pathway
04120 Ubiquitin mediated proteolysis
04122 Sulfur relay system
04130 SNARE interactions in vesicular transport
04140 Regulation of autophagy
04141 Protein processing in endoplasmic reticulum
04142 Lysosome
04144 Endocytosis
04145 Phagosome
04146 Peroxisome
04150 mTOR signaling pathway
04151 PI3K-Akt signaling pathway
04151 PI3K-Akt signaling pathway
04210 Apoptosis
04260 Cardiac muscle contraction
04270 Vascular smooth muscle contraction
04310 Wnt signaling pathway
04320 Dorso-ventral axis formation
04330 Notch signaling pathway
04340 Hedgehog signaling pathway
04350 TGF-beta signaling pathway
04360 Axon guidance
04370 VEGF signaling pathway
04380 Osteoclast differentiation
04390 Hippo signaling pathway
04391 Hippo signaling pathway -fly
04510 Focal adhesion
04514 Cell adhesion molecules (CAMs)
04520 Adherens junction
04530 Tight junction
04540 Gap junction
04612 Antigen processing and presentation
04621 NOD-like receptor signaling pathway
04622 RIG-I-like receptor signaling pathway
04623 Cytosolic DNA-sensing pathway
04626 Plant-pathogen interaction
04630 Jak-STAT signaling pathway
04650 Natural killer cell mediated cytotoxicity
04660 T cell receptor signaling pathway
04662 B cell receptor signaling pathway
04664 Fc epsilon RI signaling pathway
04666 Fc gamma R-mediated phagocytosis
04668 TNF signaling pathway
04670 Leukocyte transendothelial migration
04710 Circadian rhythm
04711 Circadian rhythm - fly
04712 Circadian rhythm - plant
04713 Circadian entrainment
04720 Long-term potentiation
04721 Synaptic vesicle cycle
04722 Neurotrophin signaling pathway
04723 Retrograde endocannabinoid signaling
04724 Glutamatergic synapse
04725 Cholinergic synapse
04726 Serotonergic synapse
04727 GABAergic synapse
04728 Dopaminergic synapse
04730 Long-term depression
04744 Phototransduction
04745 Phototransduction - fly
04810 Regulation of actin cytoskeleton
04910 Insulin signaling pathway
04913 Ovarian Steroidogenesis
04914 Progesterone-mediated oocyte maturation
04915 Estrogen signaling pathway
04916 Melanogenesis
04917 Prolactin signaling pathway
04918 Thyroid hormone synthesis
04920 Adipocytokine signaling pathway
04960 Aldosterone-regulated sodium reabsorption
04961 Endocrine and other factor-regulated calcium reabsorption
04962 Vasopressin-regulated water reabsorption
04964 Proximal tubule bicarbonate reclamation
04966 Collecting duct acid secretion
04970 Salivary secretion
04971 Gastric acid secretion
04972 Pancreatic secretion
04973 Carbohydrate digestion and absorption
04974 Protein digestion and absorption
04975 Fat digestion and absorption
04976 Bile secretion
04977 Vitamin digestion and absorption
04978 Mineral absorption
