# Supplementary material for: Comparative De Novo Transcriptome Analysis of Fertilized Ovules in Xanthoceras sorbifolium Uncovered a Pool of Genes Expressed Specifically or Preferentially in the Selfed Ovule That Are Potentially Involved in Late-Acting Self-Incompatibility
Source: PLoS One. 2015 Oct 20;10(10):e0140507. doi: 10.1371/journal.pone.0140507 (PMC4616620; doi:10.1371/journal.pone.0140507)
Supplement: S7 Table — (XLSX) [file pone.0140507.s007.xlsx]

## Sheet: Sheet1
S7 Table. Seventy-six unigenes expressed specifically or preferentially in the selfed ovules were assigned with KOG annotation and classification.
Gene_ID	KOG Annotation	KOG classification	KOG Number
comp5928_c0_seq1	Leucine-rich repeat protein	Function unknown	KOG0472
comp6110_c0_seq2	Predicted NUDIX hydrolase FGF-2 and related proteins	Signal transduction mechanisms	KOG0648
comp6943_c0_seq1	Zn2+ transporter	Inorganic ion transport and metabolism	KOG1482
comp6957_c0_seq1	Translation initiation factor 1A (eIF-1A)	Translation, ribosomal structure and biogenesis	KOG3403
comp7608_c0_seq1	60S ribosomal protein L29	Translation, ribosomal structure and biogenesis	KOG3504
comp7631_c0_seq1	Cystathionine beta-lyases/cystathionine gamma-synthases	Amino acid transport and metabolism	KOG0053
comp7915_c0_seq1	Acyl-CoA synthetase	Lipid transport and metabolism	KOG1176
comp7986_c0_seq2	Transcription factor HEX, contains HOX and HALZ domains	Transcription	KOG0483
comp8062_c0_seq1	Glyoxylate/hydroxypyruvate reductase (D-isomer-specific 2-hydroxy acid dehydrogenase superfamily)	Energy production and conversion	KOG0069
comp8205_c0_seq1	Alkyl hydroperoxide reductase, thiol specific antioxidant and related enzymes	Posttranslational modification, protein turnover, chaperones	KOG0855
comp8243_c0_seq1	Transcription factor HEX, contains HOX and HALZ domains	Transcription	KOG0483
comp8280_c0_seq1	ATP synthase F0 subunit 6 and related proteins	Energy production and conversion	KOG4665
comp8351_c0_seq1	Beta-glucosidase, lactase phlorizinhydrolase, and related proteins	Carbohydrate transport and metabolism	KOG0626
comp10091_c0_seq2	Transcription factor HEX, contains HOX and HALZ domains	Transcription	KOG0483
comp10460_c0_seq2	Transcription factor, Myb superfamily	Transcription	KOG0048
comp11333_c0_seq2	Dosage compensation complex, subunit MLE	Transcription	KOG0921
comp11599_c0_seq1	FAD-dependent oxidoreductase	General function prediction only	KOG2820
comp12177_c0_seq1	Uncharacterized conserved protein	Function unknown	KOG4174
comp12271_c0_seq1	40S ribosomal protein S25	Translation, ribosomal structure and biogenesis	KOG1767
comp13011_c0_seq1	Cytochrome P450 CYP2 subfamily	Secondary metabolites biosynthesis, transport and catabolism	KOG0156
comp13492_c0_seq1	Actin and related proteins	Cytoskeleton	KOG0676
comp13614_c0_seq1	Copper chaperone	Inorganic ion transport and metabolism	KOG1603
comp13650_c0_seq1	Ca2+/calmodulin-dependent protein kinase, EF-Hand protein superfamily	Signal transduction mechanisms	KOG0032
comp13792_c0_seq2	Uncharacterized conserved protein	Function unknown	KOG4450
comp13995_c0_seq1	Thioredoxin	Posttranslational modification, protein turnover, chaperones	KOG0907
comp14418_c0_seq2	H+/oligopeptide symporter	Amino acid transport and metabolism	KOG1237
comp15036_c0_seq1	TFIIF-interacting CTD phosphatase, including NLI-interacting factor (involved in RNA polymerase II regulation)	Transcription	KOG1605
comp15538_c1_seq2	Ubiquitin-like proteins	Posttranslational modification, protein turnover, chaperones	KOG1769
comp15623_c0_seq1	Serine/threonine protein kinase	Signal transduction mechanisms	KOG0583
comp15791_c0_seq2	Stress responsive protein	General function prediction only	KOG1773
comp16174_c0_seq3	Cytochrome P450 CYP4/CYP19/CYP26 subfamilies	Secondary metabolites biosynthesis, transport and catabolism, Lipid transport and metabolism	KOG0157
comp16820_c0_seq1	NifU-like domain-containing proteins	Posttranslational modification, protein turnover, chaperones	KOG2358
comp16909_c0_seq1	Iron/ascorbate family oxidoreductases	Secondary metabolites biosynthesis, transport and catabolism, General function prediction only	KOG0143
comp17167_c0_seq1	Serine/threonine protein phosphatase	Signal transduction mechanisms	KOG0698
comp17403_c0_seq2	Serine/threonine protein phosphatase	Signal transduction mechanisms	KOG0698
comp17418_c0_seq2	K+-dependent Na+:Ca2+ antiporter	Inorganic ion transport and metabolism	KOG2399
comp18205_c0_seq1	Annexin	Intracellular trafficking, secretion, and vesicular transport	KOG0819
comp18367_c0_seq1	Cytochrome P450 CYP2 subfamily	Secondary metabolites biosynthesis, transport and catabolism	KOG0156
comp18509_c0_seq1	Huntingtin interacting protein HYPK	General function prediction only	KOG3450
comp18656_c0_seq1	Oxidosqualene-lanosterol cyclase and related proteins	Lipid transport and metabolism	KOG0497
comp18849_c0_seq4	Acyl-CoA reductase	Lipid transport and metabolism	KOG1221
comp19364_c0_seq1	Tuftelin-interacting protein TIP39, contains G-patch domain	RNA processing and modification	KOG2184
comp19670_c0_seq1	WD40-repeat-containing subunit of the 18S rRNA processing complex	RNA processing and modification	KOG0319
comp19771_c0_seq1	Vacuolar H+-ATPase V1 sector, subunit G	Energy production and conversion	KOG1772
comp20487_c0_seq5	Transcription factor, subunit of SRB subcomplex of RNA polymerase II	Transcription	KOG3046
comp20708_c1_seq5	Hydroxyindole-O-methyltransferase and related SAM-dependent methyltransferases	General function prediction only	KOG3178
comp20728_c0_seq2	Predicted hydrolase (HAD superfamily)	General function prediction only	KOG2961
comp21396_c1_seq1	Putative translation initiation inhibitor UK114/IBM1	Translation, ribosomal structure and biogenesis	KOG2317
comp21740_c0_seq1	Transporter, ABC superfamily (Breast cancer resistance protein)	Secondary metabolites biosynthesis, transport and catabolism	KOG0061
comp21821_c0_seq2	Annexin	Intracellular trafficking, secretion, and vesicular transport	KOG0819
comp22296_c0_seq5	Uncharacterized conserved protein	Function unknown	KOG3282
comp22480_c0_seq1	Geranylgeranyl pyrophosphate synthase/Polyprenyl synthetase	Coenzyme transport and metabolism	KOG0776
comp22594_c0_seq1	Cysteine proteinase Cathepsin L	Posttranslational modification, protein turnover, chaperones	KOG1543
comp23211_c0_seq1	Phosphoadenosine phosphosulfate reductase	Amino acid transport and metabolism	KOG0189
comp23254_c0_seq1	Arylacetamide deacetylase	Defense mechanisms	KOG1515
comp23298_c0_seq1	Thioredoxin	Posttranslational modification, protein turnover, chaperones	KOG0907
comp23344_c0_seq1	Serine/threonine protein kinase	Signal transduction mechanisms	KOG0583
comp23586_c0_seq1	Predicted RNA-binding protein SEB4 (RRM superfamily)	General function prediction only	KOG0149
comp23705_c0_seq1	Serine carboxypeptidases (lysosomal cathepsin A)	Amino acid transport and metabolism, Posttranslational modification, protein turnover, chaperones	KOG1282
comp24115_c0_seq1	Cytochrome P450 CYP2 subfamily	Secondary metabolites biosynthesis, transport and catabolism	KOG0156
comp24235_c0_seq4	Permease of the major facilitator superfamily	General function prediction only	KOG2615
comp24541_c0_seq7	Serine/threonine phosphatase 2C containing leucine-rich repeats, similar to SCN circadian oscillatory protein (SCOP)	Signal transduction mechanisms	KOG0618
comp24691_c0_seq1	Ferritin	Inorganic ion transport and metabolism	KOG2332
comp24912_c0_seq3	Hydroxyindole-O-methyltransferase and related SAM-dependent methyltransferases	General function prediction only	KOG3178
comp25083_c0_seq1	Iron/ascorbate family oxidoreductases	Secondary metabolites biosynthesis, transport and catabolism, General function prediction only	KOG0143
comp25189_c0_seq1	Geranylgeranyl pyrophosphate synthase/Polyprenyl synthetase	Coenzyme transport and metabolism	KOG0776
comp26604_c0_seq1	60s ribosomal protein L15/L27	Translation, ribosomal structure and biogenesis	KOG1742
comp31612_c0_seq1	Cystathionine beta-synthase and related enzymes	Amino acid transport and metabolism	KOG1252
comp32523_c0_seq1	O-methyltransferase	Secondary metabolites biosynthesis, transport and catabolism	KOG1663
comp32688_c0_seq1	Homocysteine S-methyltransferase	Amino acid transport and metabolism	KOG1579
comp32768_c0_seq1	Acyl-CoA synthetase	Lipid transport and metabolism	KOG1176
comp34425_c0_seq1	Dosage compensation complex, subunit MLE	Transcription	KOG0921
comp45507_c0_seq1	Copper chaperone	Inorganic ion transport and metabolism	KOG1603
comp46802_c0_seq1	NifU-like domain-containing proteins	Posttranslational modification, protein turnover, chaperones	KOG2358
comp56021_c0_seq1	Predicted small molecule transporter	Intracellular trafficking, secretion, and vesicular transport	KOG1162
comp73021_c0_seq1	Cytochrome P450 CYP2 subfamily	Secondary metabolites biosynthesis, transport and catabolism	KOG0156
